# Supplementary material for: In-hospital myocardial infarction and adherence to evidence-based drug therapies: a real-world evaluation
Source: PubMed Central journal article supplement — BMJ Open. 2021 Feb 5;11(2):e042878. doi: 10.1136/bmjopen-2020-042878 (PMC7925929; doi:10.1136/bmjopen-2020-042878), 2021-02-05
Supplement: bmjopen-2020-042878.draft_revisions.pdf [file bmjopen-2020-042878.draft_revisions.pdf]

# BMJ Open

BMJ Open is committed to open peer review. As part of this commitment we make the peer review history of every article we publish publicly available.

When an article is published we post the peer reviewers' comments and the authors' responses online. We also post the versions of the paper that were used during peer review. These are the versions that the peer review comments apply to.

The versions of the paper that follow are the versions that were submitted during the peer review process. They are not the versions of record or the final published versions. They should not be cited or distributed as the published version of this manuscript.

BMJ Open is an open access journal and the full, final, typeset and author-corrected version of record of the manuscript is available on our site with no access controls, subscription charges or pay-per-view fees (<http://bmjopen.bmj.com>).

If you have any questions on BMJ Open's open peer review process please email [info.bmjopen@bmj.com](mailto:info.bmjopen@bmj.com)

# BMJ Open

## In-hospital myocardial infarction and adherence to evidence-based drug therapies: a real-world evaluation

|                               |                                                                                                                                                                                                                                                                                                                                                                                                                          |
|-------------------------------|--------------------------------------------------------------------------------------------------------------------------------------------------------------------------------------------------------------------------------------------------------------------------------------------------------------------------------------------------------------------------------------------------------------------------|
| Journal:                      | <i>BMJ Open</i>                                                                                                                                                                                                                                                                                                                                                                                                          |
| Manuscript ID                 | bmjopen-2020-042878                                                                                                                                                                                                                                                                                                                                                                                                      |
| Article Type:                 | Original research                                                                                                                                                                                                                                                                                                                                                                                                        |
| Date Submitted by the Author: | 20-Jul-2020                                                                                                                                                                                                                                                                                                                                                                                                              |
| Complete List of Authors:     | Soldati, Salvatore ; Department of Epidemiology, Lazio Regional Health Service<br>Di Martino, Mirko; Department of Epidemiology, Lazio Regional Health Service<br>Castagno, Davide; Division of Cardiology, Department of Medical Sciences, University of Turin<br>Davoli, Marina; Department of Epidemiology, Lazio Regional Health Service<br>Fusco, Danilo; Department of Epidemiology, Lazio Regional Health Service |
| Keywords:                     | Myocardial infarction < CARDIOLOGY, EPIDEMIOLOGY, Quality in health care < HEALTH SERVICES ADMINISTRATION & MANAGEMENT                                                                                                                                                                                                                                                                                                   |
|                               |                                                                                                                                                                                                                                                                                                                                                                                                                          |

SCHOLARONE™  
Manuscripts

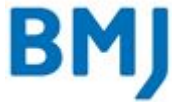

I, the Submitting Author has the right to grant and does grant on behalf of all authors of the Work (as defined in the below author licence), an exclusive licence and/or a non-exclusive licence for contributions from authors who are: i) UK Crown employees; ii) where BMJ has agreed a CC-BY licence shall apply, and/or iii) in accordance with the terms applicable for US Federal Government officers or employees acting as part of their official duties; on a worldwide, perpetual, irrevocable, royalty-free basis to BMJ Publishing Group Ltd ("BMJ") its licensees and where the relevant Journal is co-owned by BMJ to the co-owners of the Journal, to publish the Work in this journal and any other BMJ products and to exploit all rights, as set out in our [licence](#).

The Submitting Author accepts and understands that any supply made under these terms is made by BMJ to the Submitting Author unless you are acting as an employee on behalf of your employer or a postgraduate student of an affiliated institution which is paying any applicable article publishing charge ("APC") for Open Access articles. Where the Submitting Author wishes to make the Work available on an Open Access basis (and intends to pay the relevant APC), the terms of reuse of such Open Access shall be governed by a Creative Commons licence – details of these licences and which [Creative Commons](#) licence will apply to this Work are set out in our licence referred to above.

Other than as permitted in any relevant BMJ Author's Self Archiving Policies, I confirm this Work has not been accepted for publication elsewhere, is not being considered for publication elsewhere and does not duplicate material already published. I confirm all authors consent to publication of this Work and authorise the granting of this licence.

## **In-hospital myocardial infarction and adherence to evidence-based drug therapies: a real-world evaluation**

Salvatore Soldati<sup>1</sup>, Mirko Di Martino<sup>1</sup>, Davide Castagno<sup>2</sup>, Marina Davoli<sup>1</sup>, Danilo Fusco<sup>1</sup>.

(1) Department of Epidemiology, Lazio Regional Health Service, Rome, Italy.

(2) Division of Cardiology, Department of Medical Sciences, University of Turin, Turin, Italy.

*Key Words:* acute myocardial infarction; in-hospital AMI; out-of-hospital AMI; secondary prevention; adherence to poly-therapy.

*Corresponding author:* Mirko Di Martino

Department of Epidemiology, Lazio Regional Health Service

Via Cristoforo Colombo, 112 - 00147 Rome, Italy

Phone: +39 06 99722142 - Fax +39 06 99722111

E-mail: [m.dimartino@deplazio.it](mailto:m.dimartino@deplazio.it)

## ABSTRACT

### Background and aims

Little is known about acute myocardial infarction (AMI) occurring during hospital stay. Few studies compared the clinical characteristics and outcome of patients suffering in-hospital (IH-AMI) vs. out-of-hospital (OH-AMI). Guidelines for the secondary prevention of AMI recommended the use of combinations of evidence-based (E-B) drugs. However, observational studies reported poor adherence to chronic poly-therapy. The aims of the study are to measure the adherence to poly-therapy after AMI, to identify determinants of adherence to medications and, above all, to investigate the association between setting of AMI onset (IH-AMI vs. OH-AMI) and adherence to poly-therapy. However, the adherence to E-B drugs recommended for secondary prevention has never been investigated according to AMI setting of onset.

### Methods

We identified a cohort of patients hospitalized with an incident MI between 2012 and 2016. Patients were classified as IH-AMI or OH-AMI based on present-on-admission codes. Patients were followed-up for 6 months. Adherence to poly-therapy was defined as a medication possession ratio  $\geq 0.75$  for at least three of the following drugs: antithrombotics,  $\beta$ -blockers, ACEIs/ARBs, statins.

### Results

Among the 25,779 patients included (1,044 [4.1%] had an IH-AMI) 60% were adherent to chronic poly-therapy. Female gender, older age, mental disorders, renal disease, asthma and ongoing concomitant treatments were factors associated with poor adherence. By contrast, patients with more severe AMI and those already taking E-B drugs were more likely to be adherent. Strikingly, the setting of AMI onset was strongly associated with the adherence to poly-therapy: IH-AMI patients were less likely to be adherent to E-B medications during their 6-month follow-up as compared to OH-AMI patients (OR=0.54, 95%CI: 0.47-0.62).

### Conclusion

Pharmacotherapy is not consistent with clinical guidelines, especially for IH-AMI patients. Moreover, our results identify groups of patients at risk for poor adherence who might benefit from greater medical attention and dedicated health-care interventions.

## STRENGTHS AND LIMITATIONS OF THIS STUDY

- International guidelines for the secondary prevention of AMI recommended the use of combinations of evidence-based (E-B) drugs. Post-AMI survival benefit deriving from adherence to guidelines recommended poly-therapy has been clearly shown in literature. However, observational studies highlighted suboptimal use and poor compliance in the general post-AMI population and in specific subset of affected individuals.
- To the best of our knowledge, no population study attempted to determine whether poly-therapy after AMI differed in patients who had a AMI during their hospital stay as compared with those who experienced an out-of-hospital AMI.
- Adherence to drug treatment was estimated on the basis of defined daily doses. Although this is a useful instrument for comparing the results from different studies, misclassification of drug utilization may have occurred.

## INTRODUCTION

Most studies investigating acute myocardial infarction (AMI) epidemiology have focused on outpatients. Insights from these observational studies have informed risk factors and optimal treatment of MI, contributing to a progressive reduction in overall mortality and risk of recurrent AMI worldwide [1-2]. Although it is increasingly recognized that AMI can also occur among patients already hospitalized for other medical conditions [3-4] little is known about the incidence, clinical characteristics, and management of patients experiencing in-hospital AMI (IH-AMI).

Regardless of the setting of incidence, evidence-based secondary prevention strategies are based on changes in lifestyle and evidence based drug therapy. With this regard, international guidelines recommend the combined use of drugs belonging to different anatomical therapeutic chemical (ATC) groups including antithrombotic agents,  $\beta$ -blockers, angiotensin-converting enzyme inhibitors (ACEIs), angiotensin receptor blockers (ARBs) and statins [5-6].

Post-AMI survival benefit deriving from long-term adherence to guidelines recommended poly-therapy has been clearly shown in literature [7-12]. However, observational studies highlighted suboptimal use and poor compliance in the general post-AMI population and in specific subset of affected individuals [9, 13-15].

Moreover, substantial between-hospital variation in AMI treatment exist. This variability has important consequences on equal and optimal care delivery. Our research hypothesis is that the setting in which AMI develops may significantly impact on recommended therapeutic strategies and adherence to them.

Therefore, the main objectives of this study were: 1) to measure, in a real world scenario, the adherence to chronic poly-therapy following an AMI; 2) to identify determinants of adherence to E-B drugs specifically focusing on the potential association between setting of onset of AMI (i.e. IH-AMI vs. OHAMI).

To the best of our knowledge, no population study attempted to determine whether poly-therapy after AMI differed in patients who had a AMI during their hospital stay as compared with those who experienced an out-of-hospital AMI. The identification of this subgroup of patients may be useful for health planning purposes and could contribute to better tailor therapeutic interventions to the special needs of this population.

## METHODS

### Data sources

Our Department has access to health information systems of the Lazio region of Italy that contain mortality, hospital admission and drug claims data. We collected data from the Regional Hospital Information Systems (HIS), the Regional Admission and Discharge Information System (RAD), the Regional Healthcare Emergency Information System (HEIS), the Mortality Information System and the Regional Drug Dispense Registry (PHARMA).

The HIS is an integrated information system designed to collect clinical and administrative information regarding hospital admissions for each patient discharged from public and private hospitals of the Lazio region. The HIS includes patients' characteristics (single anonymous identifier, gender, date and place of birth, and place of residence); admission and discharge dates; discharge diagnoses (up to 6); procedure codes (up to 6) according to the International Classification of Disease, Ninth Revision, Clinical Modification (ICD-9-CM); hospital admission and discharge ward and a regional code that corresponds to the admitting facility.

Since July 2008 tracking of additional information about hospital discharge record has been activated in the Lazio region thanks to RAD Information System (corporate decision nr. D4118). The ministerial directive of December 2010 establishes "the integration of the HIS with additional mandatory sections for the collection of additional information about hospital discharge data". RAD collects additional information on comorbidities (e.g., time to surgery, the presence of AMI diagnosis code at hospital admission time). This information is useful to characterize the patient's severity at the time of hospitalization or surgery and also it be able to support the regional appropriateness and outcome of the treatments evaluation programs.

The HEIS includes all visits occurred in emergency departments of the Lazio region and collects: patient demographic characteristics, admission information, visit and discharge dates and hours, ICD-9-CM diagnosis at discharge, reported symptoms on arrival, status at discharge (e.g., dead, hospitalized, or discharged at home) and triage score.

Information on drugs reimbursed by the national healthcare system and dispensed by public and private pharmacies or by hospital pharmacies at discharge is available from



1  
2  
3 the Regional Drug Dispense Registry. The data available on each prescription includes  
4 patient's identification number, prescribing physician's number, Anatomical-  
5 Therapeutic-Chemical (ATC) code of the drug purchased, number of packs, number of  
6 units per pack, dosage, unit cost per pack and prescription date.  
7  
8  
9

10 Any date of death was obtained from the Mortality Information System (MIS).  
11  
12

13 Data from different information systems have been integrated using a deterministic  
14 record linkage procedure based on unique and anonymous subject identifier. In this  
15 way, we created a chronological, demographical, residential, clinical, healthcare-related  
16 patient profile.  
17  
18  
19

### 20 21 22 23 **Setting and study cohort**

24  
25  
26 The present observational study was based on the population living in the Lazio region  
27 Italy. Using data from the regional HIS, the study included a cohort of all patients  
28 discharged from hospitals between 1 January 2012 and 31 December 2016 with a  
29 diagnosis of AMI. AMI was defined according to International Classification of  
30 Diseases Ninth Revision Clinical Modification (ICD-9-CM) codes 410.xx (first or  
31 second diagnosis position). In case of multiple hospital admissions, the first admission  
32 during the study period was defined as the index admission. Subsequent hospitalizations  
33 for any reason were recorded, and repeated admissions within 2 days of discharge were  
34 regarded as one single 'episode of care'.  
35  
36  
37  
38  
39  
40  
41

42 Classification as to whether AMI occurred in-hospital was based on present-on-  
43 admission codes from RAD Information System. Admission code diagnosis was  
44 available in more than 98% of patients with AMI. Patients aged 18–100 years at  
45 discharge were screened for inclusion in the study.  
46  
47  
48  
49

50 Only incident cases of AMI were included: patients with hospital admission for AMI or  
51 related causes (i.e., percutaneous coronary intervention, bypass or surgery of the heart  
52 and great vessels) in the 5 years before index admission were excluded.  
53  
54  
55

56 Patients who were not registered in the regional health assistance file at time of  
57 discharge from hospital were excluded (note that healthcare assistance in Italy is offered  
58 to all resident citizens without restrictions). Finally, patients who had an individual  
59  
60

1  
2  
3 follow-up shorter than 30 days were excluded, to give all patients the chance to achieve  
4 clinical stability and to guarantee a minimum observation period of one month for  
5 consistently estimate adherence to poly-therapy.  
6  
7

### 8 9 **Patient and Public Involvement**

10  
11 No patient involved.  
12

### 13 14 **Patient characteristics**

15  
16 Patients were characterized according to socio-demographic factors (age, gender),  
17 comorbidities that might contraindicate prescription of specific ATC group drugs,  
18 previous use of E-B drugs, previous use of other (non E-B) medications, previous  
19 hospitalization with a diagnosis of mental disorders (ICD-9-CM codes: 290-319),  
20 hospital discharge ward and ST-elevation myocardial infarction (STEMI) as indicator of  
21 severity of disease. STEMI patients were identified using ICD-9-CM diagnosis codes  
22 410.xx, excluding 410.7x (non-ST-elevation MI) and 410.9x (acute MI, not otherwise  
23 specified) in any diagnostic position. The following diseases were assessed by health  
24 ticket exemption or during hospitalization or emergency department visit for index  
25 admission as well as in the 2 years preceding the beginning of follow-up: asthma (ICD-  
26 9-CM diagnosis code 493), renal disease (ICD-9-CM diagnosis codes: 582-588, V42.0,  
27 V45.1, V56, ICD-9-CM procedure codes: 38.95, 39.95, 54.98, 55.6), sinoatrial  
28 bradycardia (ICD-9-CM diagnosis code 427.8). These clinical conditions might  
29 contraindicate drug prescription of specific ATC groups due to potential adverse effects  
30 (e.g.  $\beta$ -blockers in patients suffering from asthma).  
31  
32  
33  
34  
35  
36  
37  
38  
39  
40  
41  
42

43 We used the number of distinct, non E-B drugs, prescribed in the 6 months preceding  
44 the beginning of follow-up as a crude measure of ongoing concomitant treatments.  
45 Medications with the same first five digits of the ATC code were considered as a group  
46 [19].  
47  
48  
49

50  
51 Moreover, to better define patients' clinical profile, during the 6 months preceding  
52 follow-up initiation, information was also collected on the use of all E-B drugs:  
53 antithrombotic agents,  $\beta$ -blockers, ACEIs, ARBs and statins.  
54  
55  
56  
57  
58  
59

### 60 **Follow-up**

1  
2  
3 We evaluated medication use ‘immediately’ after the acute event, by analyzing  
4 prescription patterns during the 6 months following discharge from the index admission.  
5 Follow-up started the same date of hospital discharge of the index episode of AMI. The  
6 end of follow-up coincided either with the end of 6-month follow-up, the date of death  
7 or with the date of all-cause hospitalization whichever came first. The last ‘censoring’  
8 criterion allows one to measure the net impact of the hospital that has discharged the  
9 patient on medication adherence without the potential interference of subsequent  
10 hospitalizations.  
11  
12  
13  
14  
15  
16  
17  
18  
19

### 20 **Definition of exposure and outcome.**

21  
22  
23 AMI were classified as IH-AMI or OH-AMI according to “present-on-admission” codes  
24 retrieved using the Regional Admission and Discharge Information System (RAD)  
25 which provides information regarding diagnostic codes (present or absent) at the time of  
26 presentation.  
27  
28  
29

30  
31 The main outcome of the study was adherence to chronic poly-therapy at 6-month  
32 follow-up. All drugs in this study were included in the patients’ health care plans and  
33 were equally available to all residents, in accordance with the universal health care  
34 coverage provided to residents of Italy. Information about prescriptions of  
35 antithrombotics (ATC: B01AC06, B01AC04, B01AC05, B01AC22, B01AC24,  
36 B01AF01, B01AF02, B01AF03, B01AA03, B01AA07, B01AE07),  $\beta$ -blockers (ATC:  
37 C07), ACEI/ARBs (ATC: C09), and statins (ATC: C10AA) were retrieved for all  
38 patients. Adherence to medication was measured through the medication possession  
39 ratio (MPR), calculated as the number of days of medication supplied during the follow-  
40 up on the basis of defined daily doses (DDDs) divided by the number of calendar days  
41 in the follow-up. Adherence to individual medications was defined as a  $MPR \geq 0.75$ .  
42 Adherence to chronic poly-therapy was defined as a  $MPR \geq 0.75$  for at least three of the  
43 four evidence-based drugs [12,13].  
44  
45  
46  
47  
48  
49  
50  
51  
52  
53  
54  
55

### 56 **Statistical analysis**

57  
58  
59 Data are presented as column-wise frequencies and percentages for categorical variables  
60 (compared using Pearson chi-squared test) and mean value  $\pm$  standard deviation for

1  
2  
3 continuous variables (compared using Student's t-test). Considering the hierarchical  
4 data structure (patients are nested within hospitals), logistic multilevel models were  
5 performed to take into account potential intra-class correlation. The variance  
6 components were expressed in terms of Median Odds Ratio (MOR), a measure that  
7 quantifies the variability between clusters, in this case between different hospitals of  
8 discharge [20]. The MOR quantifies the variation between clusters by comparing two  
9 persons from two randomly chosen clusters. Consider two persons with the same  
10 covariates, chosen randomly from two different clusters. MOR is the median odds ratio  
11 between the person of higher propensity and the person of lower propensity [21]. This  
12 measure is always equal or greater than 1. MOR equal to 1 indicates no variability  
13 between clusters; as the variability between group increases MOR value increases. In a  
14 first step, MOR was estimated using an intercept-only model. In a second step, MOR  
15 was estimated controlling for patient characteristics, in order to ensure that of the  
16 heterogeneity of patients within groups (in terms of age, comorbidities or severity of  
17 AMI) did not influence the estimates of variance.  
18  
19  
20  
21  
22  
23  
24  
25  
26  
27  
28  
29

30 Logistic multilevel models were also applied to identify determinants of adherence to  
31 evidence-based drugs, taking into account the correlation within clusters. Determinants  
32 of adherence were selected based on a priori knowledge [22-23]: gender and age,  
33 discharge ward, ST-elevation AMI, use of evidence-based drugs (i.e., antithrombotics,  
34  $\beta$ -blockers, ACEI/ARBs, statins) during the 6 months prior to the index admission  
35 (defined as at least one prescription), ongoing concomitant treatments (i.e., number of  
36 distinct non-evidence-based drugs) and relevant comorbidities retrieved from the  
37 hospital records for both the index admission and the two previous years.  
38  
39  
40  
41  
42  
43

44 Results were expressed as odds ratios (OR), 95% confidence intervals (95% CI) and p-  
45 values. Statistical analyses were carried out using Stata software, version 15  
46 (StataCorp.2015. Stata Statistical Software: Release 15. College Station, TX: StataCorp  
47 LP).  
48  
49  
50  
51  
52  
53  
54  
55  
56  
57  
58  
59  
60

## RESULTS

### The study cohort

The flow chart in figure 1 shows the selection process of the study cohort. Of the 34,854 patients discharged from hospital with a first diagnosis of AMI between January 1<sup>st</sup> 2012 and December 31<sup>th</sup> 2016, 25,779 (74%) met the inclusion criteria and were enrolled in the present study. Mean age was 68 years, 17,138 (66%) were male (Table 1). Overall, 11,108 (43%) of patients suffered an AMI with ST segment elevation and the vast majority of patients 20,207 (78%) was discharged from cardiology wards. More than 65% of patients had at least a prescription of E-B medications ( $\beta$ -blockers, anti-thrombotics, ACEI/ARBs or statins) during the 6 months prior to the index admission. Overall, more than two thirds of patients were receiving concomitant treatments (distinct group of non E-B drugs) at the time of AMI and the prevalence of these treatments showed a parallel increase with age .

Among the entire cohort, 1,044 (4.0%) patients suffered an IH-AMI. They were older, had more comorbidities (e.g. renal disease, asthma and mental disorders) and less frequently had a diagnosis of ST-elevation AMI (31% vs 44%) compared with patients experiencing an OH-AMI. In addition, the use of at least one E-B medication before hospitalisation was greater amongst patients suffering an IH-AMI compared with OH-AMI (78% vs 66%). Patients suffering IH-AMI also showed a higher prevalence of ongoing concomitant treatments (number of distinct non E-B drugs prescribed in the 6 months preceding the beginning of follow-up) and less likely were discharged from cardiology wards (48% vs 80%).

### Post-AMI adherence to evidence-based medications

The adherence to E-B medications by gender and age group is reported in table 2. Statins were characterised by the highest adherence (78%), followed by antithrombotics (69%), ACEI/ARBs (63%) and  $\beta$ -blockers (50%). Lower adherence was observed among women, most notably for statins and antithrombotics (14 and 12 percentage points lower than men, respectively). This gender difference was attenuated as age increased. Older age groups showed lower adherence to all medications. The adherence

1  
2  
3 to each of the recommended drugs decreased markedly, for both males and females,  
4 moving from the age group '75-84' to the group '85+' years.  
5  
6

7 Overall, 15,440 (60%) patients were adherent to chronic poly-therapy (as per protocol  
8 definition) following an AMI. However, only 6,463 (25%) patients were adherent to the  
9 full combination of E-B treatments considered in this study. Women were less likely to  
10 be treated with a combination of E-B drugs compared with males (51% vs. 64%). This  
11 gender difference was less pronounced as age increased (Table 3).  
12  
13  
14  
15

16 A significant variability in adherence to poly-therapy between different hospital was  
17 observed, even after controlling for patients' characteristics (MOR: 1.46; 95% CI: 1.34-  
18 1.64; p-value: <0.001, table 4). This variability was also observed when evaluating  
19 adherence to poly-therapy only for IH-AMI patients (MOR: 1.60; 95% CI: 1.34-2.12; p-  
20 value: 0.019).  
21  
22  
23  
24  
25

26 Using logistic multilevel model determinants of adherence to chronic poly-therapy were  
27 determined (table 6). A lower probability of adherence was observed in women (OR:  
28 0.75; 95% CI: 0.71-0.79; p-value: <0.001) and elderly patients. With this regard, the  
29 effect of age was not completely linear: with respect to the reference category (age less  
30 than 55 years): the probability of adherence increased in the age group '55-64' years  
31 (OR: 1.12; 95% CI: 1.03-1.22; p-value: 0.007) but decreased, although not significantly,  
32 in the group '65-74' years (OR: 0.98; 95% CI: 0.90-1.07; p-value: 0.618). A significant  
33 drop in the probability of adherence was observed in older age groups ('75-84' years  
34 OR: 0.67; 95% CI: 0.61-0.73; p-value: <0.001, ≥85 years; OR: 0.40; 95% CI: 0.35-0.44;  
35 p-value: <0.001). A similar trend was observed for the ongoing concomitant treatments  
36 in the six months before index admission.  
37  
38  
39  
40  
41  
42  
43  
44  
45

46 In addition, lower adherence to chronic poly-therapy was observed among patients with  
47 comorbidities. In contrast, a significantly higher adherence to poly-therapy was  
48 observed amongst patients already taking E-B drugs in the 6 months prior index  
49 admission (OR: 1.57; 95% CI: 1.47-1.67; p-value: <0.001) and amongst patients  
50 suffering from an ST-elevation MI (OR: 1.48; 95% CI: 1.40-1.56; p-value: <0.001).  
51  
52  
53  
54  
55

56 After adjustment for potential confounders (including age, gender, renal disease,  
57 sinoatrial bradycardia, asthma, mental disorders, ST-elevation AMI, ongoing  
58 concomitant treatments and E-B drugs use during the 6 months prior to hospitalization)  
59  
60

1  
2  
3 patients suffering IH-AMI were 46% less likely to be adherent to poly-therapy as  
4 compared with OH-AMI patients (OR: 0.54; 95% CI: 0.47-0.62; p-value: <0.001).  
5  
6  
7  
8  
9  
10  
11

## 12 DISCUSSION

### 13 **Incidence and clinical characteristics of patients with an IH-AMI.**

14  
15  
16  
17 Acute myocardial infarction occurring in patients who have already been admitted to the  
18 hospital for other clinical conditions is an entity that has been poorly investigated so far.  
19 In this study, amongst all the patients experiencing an AMI between January 1<sup>st</sup> 2012  
20 and December 31<sup>th</sup> 2016 in Lazio region (see cohort selection in figure 1), the incidence  
21 of IH-AMI was 4.0%. Our study has several key findings. First, compared with OH-  
22 AMI patients, those suffering an IH-AMI were more often female, older and less likely  
23 to be discharged from cardiology wards, possibly reflecting a higher burden of  
24 comorbidities. Indeed, IH-AMI patients had more often a history of renal disease,  
25 asthma, mental disorders and more frequently were treated with beta-blockers,  
26 antithrombotic agents, ACE-Is/ARBs or statins in the 6 months prior the index event  
27 Interestingly, IH-AMI patients less frequently suffered from a ST-elevation AMI. These  
28 findings are concordant with the observations from other studies Zahn et al. [24].  
29 Maynard et al. [3] reported that patients who had a AMI while hospitalized for other  
30 medical conditions were older, more likely to have atypical symptoms, and had higher  
31 rates of renal disease, cerebrovascular disease, congestive heart failure, diabetes  
32 mellitus, chronic obstructive pulmonary disease, dementia, and cancer than patients who  
33 presented as OH-AMI to the Department of Veterans Affairs Health System.  
34  
35  
36  
37  
38  
39  
40  
41  
42  
43  
44  
45  
46  
47

48 Second, and possibly even more important, we observed that patients experiencing an  
49 IH-AMI were less likely to be adherent to E-B medications for secondary prevention of  
50 AMI during 6-month follow-up. This may be mainly explained by different patient  
51 characteristics. Another possible explanation is that, given the often complex and  
52 atypical presentations of cardiac disease in patients with other significant comorbidities.  
53 Moreover IH-AMI patients were more likely to be discharged from non-cardiological  
54 wards and this may have negatively impacted on the quality of care after the acute  
55 event.  
56  
57  
58  
59  
60



### **Adherence to chronic poly-therapy.**

Concerning the whole study period, we found that after a hospital discharge for AMI, only 60% of patients were adherent to poly-therapy in the following 6 months. Treatments with proven benefit in secondary prevention following an AMI were underused in this study. This result is alarming if we consider that our definition of adherence was not very restrictive (i.e. adherence defined as MPR  $\geq$  75% for at least three of the four predefined E-B drugs) and that adherence was evaluated only for the first 6 months after AMI (adherence should be greater in the initial stages of care and may decrease over time) [25]. Our findings are consistent with the results of other investigations, which reported unsatisfactory prescribing rates of E-B therapies after AMI during different time frames [14] and in different countries [21-22-24].

To the best of our knowledge our study was the first to assess, whether adherence differed between patients who had an IH-AMI as compared with those who experienced an OH-AMI. Interestingly, the setting of AMI onset had a significant impact on poly-therapy adherence. In fact, patients who had an AMI during their hospital stay were less likely to be adherent to chronic poly-therapy compared with patients who had an AMI outside of the hospital. In crude logistic multilevel model, IH-AMI patients were 53% less likely to be adherent as compared with OH-AMI patients (OR: 0.47; 95% CI: 0.41-0.54; p-value: <0.001). After adjustment for potential confounders, this relationship was only slightly attenuated but remained strongly significant (OR: 0.54; 95% CI: 0.47-0.62; p-value: <0.001) (table 6). Of note, estimates were adjusted for all variables identified as determinants of adherence to poly-therapy such as age, gender, renal disease, sinoatrial bradycardia, asthma, mental disorders, ST-elevation MI, ongoing concomitant treatments and E-B drugs use during the 6 months prior to hospitalisation. Although being discharge from a specialized hospital ward (e.g., cardiology, cardiac surgery, coronary care units) was found to be associated with higher adherence rates in previous studies [16-18], we decided not to adjust for discharge ward because we felt it could be a proxy for setting of MI onset. IH-AMI patients were less likely discharged from cardiology wards (48% vs 80%) and this reflects a different care pathway for those compared to patients who had an OH-AMI. In this situation, an adjustment for discharge ward, could have introduced (rather than eliminated) a bias (overadjustment) [27].



1  
2  
3 We also found that female gender, older age, mental disorders, renal disease, asthma  
4 and ongoing concomitant treatments were significantly associated with non-adherence  
5 to chronic poly-therapy. Conversely, adherence was positively and significantly  
6 associated with patients who had a severe form of disease (ST-elevation AMI) and  
7 patients who have already begun E-B drugs in the 6 months before index admission.  
8  
9

10  
11  
12 Our findings are consistent with the results of other investigations. It is notable that the  
13 current study demonstrates that women are receiving less optimal medical therapy in all  
14 age groups and all drug categories. The clinical relevance of gender differences varies  
15 by age and type of medication. For example, small differences are observed in the use  
16 of beta-blockers, larger differences are observed in the use of statins. Additionally,  
17 women are still considered at lower risk of acute myocardial infarction, which makes  
18 physicians less aware of the risk of new cardiovascular events, causing lower medical  
19 adherence. Smolina et al. confirmed these gender differences and showed that treatment  
20 was less often initiated in women [28]. Older age was also found to be associated with  
21 lower adherence in several previous studies [9,15,17,18]. A higher prevalence of  
22 cognitive disorders, memory impairment, and limited ability to absorb new information  
23 in the elderly population have been associated with lower adherence. Tuppin et al.  
24 reported that adherence to E-B treatment was decreased significantly by an age greater  
25 than 74 years [18], confirming our findings. The prescription of complex regimens  
26 including multiple drugs has been widely acknowledged as a barrier to patient  
27 adherence [29]: the longer the list of drugs prescribed, the lower the adherence of  
28 patients. Chronic conditions like asthma, sinoatrial bradycardia and renal disease reduce  
29 drug prescription of specific ATC groups due to adverse effects and contraindications  
30 increasing the probability of poor adherence to chronic poly-therapy. A previous  
31 hospitalization with a diagnosis of mental disorders decreased the odds of adherence:  
32 the mechanisms by which mental disorders can affect adherence may include poor  
33 motivation, pessimism about treatment effectiveness, diminished attention, memory and  
34 cognition, decreased self-care, and even intentional self-harm [30]. Moreover, patients  
35 suffering from a ST-elevation AMI or those who had already begun E-B drugs before  
36 index AMI were more likely to be adherent to chronic poly-therapy. The former have  
37 had a more severe form of the disease and were probably more carefully monitored and  
38 made aware of the long-term benefits generated by a continuous and persistent drug  
39 treatment. The latter were already used to the chronic and continuous intake of those  
40  
41  
42  
43  
44  
45  
46  
47  
48  
49  
50  
51  
52  
53  
54  
55  
56  
57  
58  
59  
60

1  
2  
3 drugs that are recommended for the secondary prevention of MI, as a sort of “inertial  
4 effect”.  
5  
6  
7  
8  
9

### 10 **Strengths and limitations of the study.**

11  
12 The population-based design, a large number of patients involved and the opportunity to  
13 integrate many sources of data to define and analyse the patient’s care pathway are the  
14 main strengths of this study. Moreover, to our knowledge, this is the first study to  
15 evaluate the adherence to E-B medications, taking into account the setting of AMI  
16 onset.  
17  
18  
19  
20

21  
22 However, the results come from a single region in Italy and may not be generalizable to  
23 the other Italian regions due to possible differences in the organization of regional  
24 health care services. This notwithstanding, our results are in line with results of similar  
25 studies carried out in Italy [31]. Moreover, our pharmaceutical database does not  
26 contain information on the prescribed daily doses and adherence to drug treatment was  
27 estimated on the basis of the DDDs. Although this is a useful instrument for comparing  
28 the results from different studies [32], misclassification of drug utilization may have  
29 occurred.  
30  
31  
32  
33  
34  
35

36  
37 Finally, although all available potential confounders were included in the models to  
38 adjust for differences in patients characteristics, we cannot exclude that the lack of more  
39 detailed clinical data might have caused unmeasured confounding. We tried to  
40 counteract this limit by applying a number of restrictions to obtain a cohort with  
41 patients that were as homogeneous as possible.  
42  
43  
44  
45  
46  
47

### 48 **Conclusions.**

49  
50  
51 The availability of information systems offers the opportunity to monitor the quality of  
52 care and identify weaknesses in public health-care systems. Although most attention has  
53 been paid to patients with AMI admitted via the community emergency medical system  
54 or through the emergency department, AMI occurring during hospitalization for other  
55 medical problems is an important clinical problem.  
56  
57  
58  
59  
60

1  
2  
3 Our findings show that, in clinical practice, pharmacotherapy for secondary prevention  
4 of AMI is not fully consistent with clinical guidelines, especially for IH-AMI patients.  
5 Moreover, we found the setting of AMI onset was strongly associated with adherence to  
6 chronic poly-therapy. The results of our study may be of help to identify groups of  
7 patients at risk for non-adherence who might benefit from greater medical attention and  
8 dedicated health-care interventions.  
9  
10  
11  
12

13  
14 Finally, our results suggest that efforts to improve adherence to E-B medications in  
15 clinical practice, should focus especially on patients who had an infarction during their  
16 stay in hospital, an issue that deserves further analysis.  
17  
18  
19  
20  
21  
22  
23  
24  
25  
26  
27  
28  
29  
30  
31  
32  
33  
34  
35  
36  
37  
38  
39  
40  
41  
42  
43  
44  
45  
46  
47  
48  
49  
50  
51  
52  
53  
54  
55  
56  
57  
58  
59  
60

**Figure 1. Cohort selection. Exclusion criteria flow chart**

For peer review only

1  
2  
3  
4  
5  
6  
7  
8  
9  
10  
11  
12  
13  
14  
15  
16  
17  
18  
19  
20  
21  
22  
23  
24  
25  
26  
27  
28  
29  
30  
31  
32  
33  
34  
35  
36  
37  
38  
39  
40  
41  
42  
43  
44  
45  
46  
47  
48  
49  
50  
51  
52  
53  
54  
55  
56  
57  
58  
59  
60

**Table 1. Baseline characteristics of the study cohort**

|                                                           | <b>Total cohort</b><br><b>25.779 (100%)</b> | <b>IH-AMI</b><br><b>1.044 (4.0%)</b> | <b>OH-AMI</b><br><b>24.735 (96.0%)</b> |
|-----------------------------------------------------------|---------------------------------------------|--------------------------------------|----------------------------------------|
|                                                           | <b>N (%)</b>                                | <b>N (%)</b>                         | <b>N (%)</b>                           |
| Age group (years)                                         |                                             |                                      |                                        |
| 18-54                                                     | 4702 (18.24)                                | 101 (9.67)                           | 4601 (18.6)                            |
| 55-64                                                     | 5886 (22.83)                                | 149 (14.27)                          | 5737 (23.19)                           |
| 65-74                                                     | 6387 (24.78)                                | 243 (23.28)                          | 6144 (24.84)                           |
| 75-84                                                     | 6122 (23.75)                                | 360 (34.48)                          | 5762 (23.29)                           |
| 85 +                                                      | 2682 (10.4)                                 | 191 (18.3)                           | 2491 (10.07)                           |
| Age, mean(std), years                                     | 67.61 (13.20)                               | 73.19 (12.52)                        | 67.37 (13.18)                          |
| Gender (men)                                              | 17138 (66.48)                               | 590 (56.51)                          | 16548 (66.9)                           |
| ST-elevation MI                                           | 11108 (43.09)                               | 319 (30.56)                          | 10789 (43.62)                          |
| Renal disease                                             | 2335 (9.06)                                 | 166 (15.9)                           | 2169 (8.77)                            |
| Sinoatrial bradycardia                                    | 249 (0.97)                                  | 10 (0.96)                            | 239 (0.97)                             |
| Asthma                                                    | 188 (0.73)                                  | 12 (1.15)                            | 176 (0.71)                             |
| Mental disorders                                          | 1098 (4.26)                                 | 97 (9.29)                            | 1001 (4.05)                            |
| Ongoing concomitant treatments (distinct group of drugs)* |                                             |                                      |                                        |
| 0-1                                                       | 7587 (29.43)                                | 180 (17.24)                          | 7407 (29.95)                           |
| 2-4                                                       | 8507 (33)                                   | 293 (28.07)                          | 8214 (33.21)                           |
| 5-7                                                       | 5236 (20.31)                                | 272 (26.05)                          | 4964 (20.07)                           |
| 8-10                                                      | 2688 (10.43)                                | 161 (15.42)                          | 2527 (10.22)                           |
| >10                                                       | 1761 (6.83)                                 | 138 (13.22)                          | 1623 (6.56)                            |
| E-B drugs use (at least 1 prescription)*                  | 17083 (66.27)                               | 811 (77.68)                          | 16272 (65.79)                          |
| Discharge ward (cardiology)                               | 20207 (78.39)                               | 501 (47.99)                          | 19706 (79.67)                          |

\*, prescribed in the 6 months preceding the index admission; E-B, evidence-based

**Table 2. Adherence to evidence-based medications by gender and age group**

| Age group<br>(years) | $\beta$ -Blockers<br>(%) | ACEI/ARBs<br>(%) | Antithrombotics<br>(%) | Statins<br>(%) |
|----------------------|--------------------------|------------------|------------------------|----------------|
| <b>Males</b>         |                          |                  |                        |                |
| 18-54                | 55.20                    | 62.50            | 77.18                  | 87.74          |
| 55-64                | 54.41                    | 68.83            | 78.00                  | 88.37          |
| 65-74                | 51.44                    | 68.64            | 74.20                  | 83.74          |
| 75-84                | 45.18                    | 61.81            | 65.80                  | 73.83          |
| 85 +                 | 37.44                    | 50.25            | 54.99                  | 58.93          |
| <b>Total</b>         | <b>51.10</b>             | <b>64.94</b>     | <b>73.20</b>           | <b>82.59</b>   |
| <b>Females</b>       |                          |                  |                        |                |
| 18-54                | 48.95                    | 49.20            | 66.83                  | 76.33          |
| 55-64                | 51.67                    | 61.61            | 68.83                  | 78.97          |
| 65-74                | 52.00                    | 65.37            | 65.27                  | 76.24          |
| 75-84                | 48.92                    | 61.77            | 58.74                  | 67.44          |
| 85 +                 | 40.21                    | 53.99            | 51.69                  | 51.15          |
| <b>Total</b>         | <b>48.34</b>             | <b>59.90</b>     | <b>61.03</b>           | <b>68.81</b>   |
| <b>Whole cohort</b>  |                          |                  |                        |                |
| 18-54                | 54.13                    | 60.21            | 75.39                  | 85.77          |
| 55-64                | 53.84                    | 67.33            | 75.99                  | 86.41          |
| 65-74                | 51.62                    | 67.59            | 71.33                  | 81.34          |
| 75-84                | 46.93                    | 61.79            | 62.50                  | 70.84          |
| 85 +                 | 39.19                    | 52.61            | 52.91                  | 54.03          |
| <b>Total</b>         | <b>50.18</b>             | <b>63.25</b>     | <b>69.12</b>           | <b>77.97</b>   |

ACEI/ARBs, angiotensin-converting enzyme inhibitors/angiotensin receptor blockers

**Table 3. Adherence to chronic poly-therapy by gender and age group**

| Age group<br>(years) | Adherence (%)<br>(MPR $\geq$ 75% at least 3 of 4 E-B drugs) | Adherence (%)<br>(MPR $\geq$ 75% for all 4 E-B drugs) |
|----------------------|-------------------------------------------------------------|-------------------------------------------------------|
| <b>Males</b>         |                                                             |                                                       |
| 18-54                | 67.95                                                       | 32.20                                                 |
| 55-64                | 70.53                                                       | 32.47                                                 |
| 65-74                | 67.12                                                       | 27.72                                                 |
| 75-84                | 54.05                                                       | 20.12                                                 |
| 85 +                 | 39.15                                                       | 11.81                                                 |
| <b>Total</b>         | <b>64.13</b>                                                | <b>27.66</b>                                          |
| <b>Females</b>       |                                                             |                                                       |
| 18-54                | 51.91                                                       | 23.55                                                 |
| 55-64                | 60.64                                                       | 25.67                                                 |
| 65-74                | 58.88                                                       | 24.59                                                 |
| 75-84                | 51.08                                                       | 18.06                                                 |
| 85 +                 | 36.37                                                       | 11.53                                                 |
| <b>Total</b>         | <b>51.49</b>                                                | <b>19.93</b>                                          |
| <b>Whole cohort</b>  |                                                             |                                                       |
| 18-54                | 65.19                                                       | 30.71                                                 |
| 55-64                | 68.47                                                       | 31.06                                                 |
| 65-74                | 64.47                                                       | 26.71                                                 |
| 75-84                | 52.66                                                       | 19.16                                                 |
| 85 +                 | 37.40                                                       | 11.63                                                 |
| <b>Total</b>         | <b>59.89</b>                                                | <b>25.07</b>                                          |

**Table 4. Variation between clusters: the MORs**

| Multilevel model     | Level of analysis | Explanatory variables     | MOR (95% CI)       | p Value |
|----------------------|-------------------|---------------------------|--------------------|---------|
| Two-level regression | (Patients) - HoD  | Intercept only            | 1.86 (1.63 - 2.20) | <0.001  |
| Two-level regression | (Patients) - HoD  | Patient's characteristics | 1.46 (1.34 - 1.64) | <0.001  |

HoD, hospital of discharge; MOR, median odds ratio

**Table 5. Variation between clusters for in-hospital patients: the MORs**

| Multilevel model     | Level of analysis | Explanatory variables     | MOR (95% CI)       | p Value |
|----------------------|-------------------|---------------------------|--------------------|---------|
| Two-level regression | (Patients) - HoD  | Intercept only            | 1.72 (1.45 - 2.22) | 0.005   |
| Two-level regression | (Patients) - HoD  | Patient's characteristics | 1.60 (1.34 - 2.12) | 0.019   |

HoD, hospital of discharge; MOR, median odds ratio



**Table 6. Association between adherence to chronic poly-therapy and symptom onset (IH-AMI VS OH-AMI), socio-demographics and clinical characteristics.**

| Category                                                                                                  | Subcategory | OR   | 95% CI      | p Value |
|-----------------------------------------------------------------------------------------------------------|-------------|------|-------------|---------|
| Symptom onset of AMI                                                                                      | OH-AMI      | 1.00 | -           | -       |
|                                                                                                           | IH-AMI      | 0.54 | 0.47 - 0.62 | <0.001  |
| Gender of patient                                                                                         | Male        | 1.00 | -           | -       |
|                                                                                                           | Female      | 0.75 | 0.71 - 0.79 | <0.001  |
| Age group (years)                                                                                         | (18-54)     | 1.00 | -           | -       |
|                                                                                                           | (55-64)     | 1.12 | 1.03 - 1.22 | 0.007   |
|                                                                                                           | (65-74)     | 0.98 | 0.90 - 1.07 | 0.618   |
|                                                                                                           | (75-84)     | 0.67 | 0.61 - 0.73 | <0.001  |
|                                                                                                           | (85 +)      | 0.40 | 0.35 - 0.44 | <0.001  |
| Renal disease                                                                                             | No          | 1.00 | -           | -       |
|                                                                                                           | Yes         | 0.58 | 0.53 - 0.64 | <0.001  |
| Sinoatrial bradycardia                                                                                    | No          | 1.00 | -           | -       |
|                                                                                                           | Yes         | 0.83 | 0.64 - 1.08 | 0.171   |
| Asthma                                                                                                    | No          | 1.00 | -           | -       |
|                                                                                                           | Yes         | 0.51 | 0.37 - 0.69 | <0.001  |
| ST-elevation MI                                                                                           | No          | 1.00 | -           | -       |
|                                                                                                           | Yes         | 1.48 | 1.40 - 1.56 | <0.001  |
| Ongoing concomitant treatments in the 6 months before index admission (number of distinct group of drugs) | (0-1)       | 1.00 | -           | -       |
|                                                                                                           | (2-4)       | 1.05 | 0.98 - 1.13 | 0.147   |
|                                                                                                           | (5-7)       | 0.92 | 0.84 - 1.00 | 0.055   |
|                                                                                                           | (8-10)      | 0.90 | 0.81 - 0.99 | 0.046   |
|                                                                                                           | (10 +)      | 0.73 | 0.64 - 0.82 | <0.001  |
| E-B drugs use in the 6 months before index admission (at least 1 prescription)                            | No          | 1.00 | -           | -       |
|                                                                                                           | Yes         | 1.57 | 1.47 - 1.67 | <0.001  |
| Mental disorders                                                                                          | No          | 1.00 | -           | -       |
|                                                                                                           | Yes         | 0.72 | 0.63 - 0.82 | <0.001  |

OR, odds ratio; CI, confidence interval; E-B, evidence-based

## CONTRIBUTORSHIP STATEMENT

*Salvatore Soldati* contributed to the concept and design of the study, the acquisition of data from the Lazio regional health information systems, the analysis of data and the statistical methodology required for the analytic modelling, the interpretation of results, and the writing of the article.

*Mirko Di Martino* contributed to the design of the study, the statistical methodology required for the analytic modelling, the interpretation of results, and the writing of the article.

*Davide Castagno* contributed to the clinical interpretation of results, and the writing of the article.

*Marina Davoli* and *Daniilo Fusco* contributed to the design of the study, and the critical revision of the paper for important intellectual content, and they have given their final approval of the version submitted for publication.

All authors agree to be accountable for all aspects of the work and ensure that questions related to the accuracy or integrity of any part of the work were appropriately investigated and resolved.

## COMPETING INTERESTS

The authors declare that they have no conflict of interest.

## FUNDING STATEMENT

The authors received no specific funding for this research from any funding agency in the public, commercial or not-for-profit sectors.

## DATA SHARING STATEMENT

No additional data are available.

## PRIVACY LAWS

This study was carried out in full compliance with the current privacy laws. The Department of Epidemiology is legitimized by the Lazio Region Committee in managing and analyzing data from the regional health information systems for epidemiological purposes.

## References

1. Peterson ED, Shah BR, Parsons L, et al. Trends in quality of care for patients with acute myocardial infarction in the National Registry of Myocardial Infarction from 1990 to 2006. *Am Heart J.* 2008; 156(6):1045-1055.
2. Yeh RW, Sidney S, ChandraM, Sorel M, Selby JV, Go AS. Population trends in the incidence and outcomes of acute myocardial infarction. *N Engl J Med.* 2010; 362(23): 2155-2165.
3. Maynard C, Lowy E, Rumsfeld J, et al. The prevalence and outcomes of in-hospital acute myocardial infarction in the Department of Veterans Affairs health system. *Arch Intern Med.* 2006; 166(13): 1410-1416.
4. Erne P, Bertel O, Urban P, Pedrazzini G, Lüscher TF, Radovanovic D; AMIS Plus Investigators. Inpatient versus outpatient onsets of acute myocardial infarction. *Eur J Intern Med.* 2015; 26(6): 414-419.
5. National Institute for Clinical Excellence. Secondary prevention in primary and secondary care for patients following a myocardial infarction. NICE guidelines [CG172]. Published date: November 2013.
6. Smith SC Jr, Benjamin EJ, Bonow RO, Braun LT, Creager MA, et al. AHA/ACCF secondary prevention and risk reduction therapy for patients with coronary and other atherosclerotic vascular disease: 2011 update: a guideline from the American Heart Association and American College of Cardiology Foundation endorsed by the World Heart Federation and the Preventive Cardiovascular Nurses Association. *J Am Coll Cardiol* 2011; 58:2432-46.
7. Briffa T, Hickling S, Knuiman M, et al. Long term survival after evidence based treatment of acute myocardial infarction and revascularisation: follow-up of population based Perth MONICA cohort, 1984–2005. *BMJ* 2009; 338:b36.
8. Gouya G, Reichardt B, Ohrenberger G, et al. Survival of patients discharged after acute myocardial infarction and evidence-based drug therapy. *Eur J Epidemiol* 2007; 22: 145–9.
9. Yan AT, Yan RT, Tan M, et al., Canadian ACS Registries Investigators. Optimal medical therapy at discharge in patients with acute coronary

- 1  
2  
3 syndromes: temporal changes, characteristics, and 1-year outcome. *Am Heart J*  
4 2007; 154: 1108–15.  
5  
6  
7  
8 10. Newby LK, LaPointe NM, Chen AY, et al. Long-term adherence to evidence-  
9 based secondary prevention therapies in coronary artery disease. *Circulation*  
10 2006; 113: 203–12.  
11  
12  
13 11. Mukherjee D, Fang J, Chetcuti S, et al. Impact of combination evidence-based  
14 medical therapy on mortality in patients with acute coronary syndromes.  
15 *Circulation* 2004; 109:745–9.  
16  
17  
18  
19 12. Kirchmayer U, Di Martino M, Agabiti N, et al. Effect of evidence-based drug  
20 therapy on long-term outcomes in patients discharged after myocardial  
21 infarction: a nested case–control study in Italy. *Pharmacoepidemiol Drug Saf*  
22 2013; 22: 649–57.  
23  
24  
25  
26  
27 13. Di Martino M, Alagna M, Cappai G, et al. Adherence to evidence-based drug  
28 therapies after myocardial infarction: is geographic variation related to hospital  
29 of discharge or primary care providers? A cross-classified multilevel design.  
30 *BMJ Open*. 2016;6(4):e010926.  
31  
32  
33  
34  
35 14. Gislason GH, Rasmussen JN, Abildstrøm SZ, et al. Long-term compliance with  
36 beta-blockers, angiotensin-converting enzyme inhibitors, and statins after acute  
37 myocardial infarction. *Eur Heart J* 2006; 27: 1153–8.  
38  
39  
40  
41 15. Kirchmayer U, Agabiti N, Belleudi V, et al. Socio-demographic differences in  
42 adherence to evidence-based drug therapy after hospital discharge from acute  
43 myocardial infarction: a population-based cohort study in Rome, Italy. *J Clin*  
44 *Pharm Ther* 2012; 37: 37–44.  
45  
46  
47  
48 16. Simpson E, Beck C, Richard H, Eisenberg MJ, Pilot L. Drug prescriptions after  
49 acute myocardial infarction: dosage, compliance, and persistence. *American*  
50 *Heart Journal*, 2003; 145(3): 438–444.  
51  
52  
53  
54 17. Austin PC, Tu JV, Ko DT, Alter DA. Use of evidence-based therapies after  
55 discharge among elderly patients with acute myocardial infarction. *Canadian*  
56 *Medical Association Journal*, 2008; 179(9): 895–900.  
57  
58  
59  
60

- 1  
2  
3 18. Tuppin P, Neumann A, Danchin N, Weill A, Ricordeau P, de Peretti C,  
4 Allemand H. Combined secondary prevention after hospitalization for  
5 myocardial infarction in France: analysis from a large administrative database.  
6 Archives of Cardiovascular Diseases, 2009; 102(4): 279–292.  
7  
8  
9
- 10  
11 19. Schneeweiss S, Seeger JD, Maclure M, et al. Performance of comorbidity scores  
12 to control for confounding in epidemiologic studies using claims data. *Am J*  
13 *Epidemiol* 2001; 154 (9): 854 – 864.  
14  
15
- 16  
17 20. Larsen K, Merlo J. Appropriate assessment of neighborhood effects on  
18 individual health: integrating random and fixed effects in multilevel logistic  
19 regression. *American Journal of Epidemiology* 2005; 161: 81-88.  
20  
21
- 22  
23 21. Di Martino M, Ventura M, Cappai G, et al. Discharge from COPD: how much of  
24 the geographic variation is attributable to the hospital of discharge and how  
25 much to the primary care providers? *COPD* 2017; 14(1): 86-94.  
26  
27
- 28  
29 22. Ho PM, Bryson CL, Rumsfeld JS. Medication adherence: its importance in  
30 cardiovascular outcomes. *Circulation* 2009; 119:3028–35.  
31  
32
- 33 23. Mathews R, Wang TY, Honeycutt E, et al. TRANSLATE-ACS Study  
34 Investigators. Persistence with secondary prevention medications after acute  
35 myocardial infarction: insights from the TRANSLATE-ACS study. *Am Heart J*  
36 2015; 170:62–9.  
37  
38  
39
- 40  
41 24. Zahn R, Schiele R, Seidl K, et al; Maximal Individual Therapy in Acute  
42 Myocardial Infarction (MITRA) Study Group. Acute myocardial infarction  
43 occurring in versus out of the hospital: patient characteristics and clinical  
44 outcome. *J Am Coll Cardiol*. 2000; 35:1820–1826.  
45  
46  
47
- 48  
49 25. Sanf elix-Gimeno G, Peir  S, Ferreros I, et al. Adherence to evidence-based  
50 therapies after acute coronary syndrome: a retrospective population-based cohort  
51 study linking hospital, outpatient, and pharmacy health information systems in  
52 Valencia, Spain. *J Manag Care Pharm* 2013; 19:247–57.  
53  
54
- 55  
56 26. Di Martino M, Kirchmayer U, Agabiti N, et al. The impact of time-window bias  
57 on the assessment of the long-term effect of medication adherence: the case of  
58  
59  
60

- 1  
2  
3 secondary prevention after myocardial infarction. *BMJ OPEN*, 2015; 5(6):  
4 e007866.  
5  
6  
7  
8 27. VanderWeele, Tyler J. On the Relative Nature of Overadjustment and  
9 Unnecessary Adjustment. *Epidemiology* 2009; 20; 496-499.  
10  
11  
12 28. Smolina K, Ball L, Humphries KH, et al. Sex disparities in post-acute  
13 myocardial infarction pharmacologic treatment initiation and adherence:  
14 Problem for young women. *Circ Cardiovasc Qual Outcomes* 2015; 8: 586–592.  
15  
16  
17 29. Vermeire E, Hearnshaw H, Van RP, Denekens J. Patient adherence to treatment:  
18 three decades of research. A comprehensive review. *J Clin Pharm Ther*  
19 2001;26(5):331-42  
20  
21  
22  
23 30. Wang PS, Bohn RL, Knight E, Glynn RJ, Mogun H, Avorn J. Noncompliance  
24 with antihypertensive medications: the impact of depressive symptoms and  
25 psychosocial factors. *J Gen Intern Med* 2002;17(7):504-11  
26  
27  
28  
29 31. Filippi A, D'Ambrosio G, Giustini SE, et al. Pharmacological treatment after  
30 acute myocardial infarction from 2001 to 2006: a survey in Italian primary care.  
31 *J Cardiovasc Med* 2009; 10: 714–18.  
32  
33  
34  
35 32. World Health Organization Collaborating Centre for Drug Statistics  
36 Methodology, Guidelines for ATC classification and DDD assignment 2013  
37 (16th edition). Oslo, Norway, 2012.  
38  
39  
40  
41  
42  
43  
44  
45  
46  
47  
48  
49  
50  
51  
52  
53  
54  
55  
56  
57  
58  
59  
60

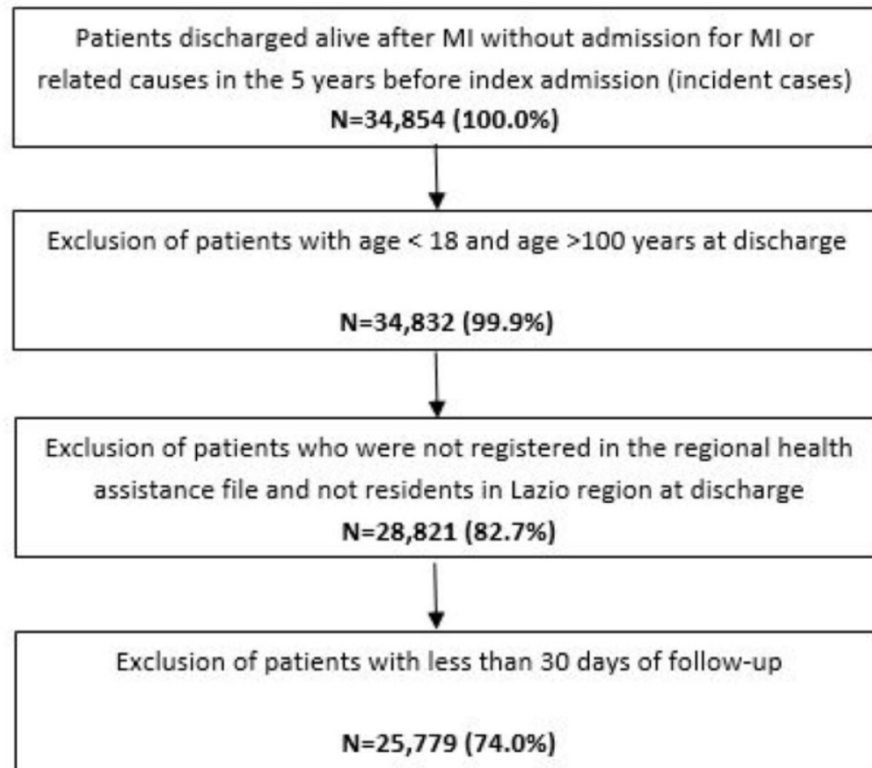

Figure1. Cohort selection. Exclusion criteria flow chart

111x92mm (300 x 300 DPI)

**STROBE 2007 (v4) checklist of items to be included in reports of observational studies in epidemiology\***  
**Checklist for cohort, case-control, and cross-sectional studies (combined)**

| Section/Topic             | Item # | Recommendation                                                                                                                                                                                                                                                                                                                                                                                                                                                         | Reported on page #                                          |
|---------------------------|--------|------------------------------------------------------------------------------------------------------------------------------------------------------------------------------------------------------------------------------------------------------------------------------------------------------------------------------------------------------------------------------------------------------------------------------------------------------------------------|-------------------------------------------------------------|
| Title and abstract        | 1      | (a) Indicate the study's design with a commonly used term in the title or the abstract                                                                                                                                                                                                                                                                                                                                                                                 | 1, 2                                                        |
|                           |        | (b) Provide in the abstract an informative and balanced summary of what was done and what was found                                                                                                                                                                                                                                                                                                                                                                    | 2                                                           |
| <b>Introduction</b>       |        |                                                                                                                                                                                                                                                                                                                                                                                                                                                                        |                                                             |
| Background/rationale      | 2      | Explain the scientific background and rationale for the investigation being reported                                                                                                                                                                                                                                                                                                                                                                                   | 4                                                           |
| Objectives                | 3      | State specific objectives, including any pre-specified hypotheses                                                                                                                                                                                                                                                                                                                                                                                                      | 4                                                           |
| <b>Methods</b>            |        |                                                                                                                                                                                                                                                                                                                                                                                                                                                                        |                                                             |
| Study design              | 4      | Present key elements of study design early in the paper                                                                                                                                                                                                                                                                                                                                                                                                                | 5, 6,7                                                      |
| Setting                   | 5      | Describe the setting, locations, and relevant dates, including periods of recruitment, exposure, follow-up, and data collection                                                                                                                                                                                                                                                                                                                                        | 5, 6, 7, 8                                                  |
| Participants              | 6      | (a) <i>Cohort study</i> —Give the eligibility criteria, and the sources and methods of selection of participants. Describe methods of follow-up<br><i>Case-control study</i> —Give the eligibility criteria, and the sources and methods of case ascertainment and control selection. Give the rationale for the choice of cases and controls<br><i>Cross-sectional study</i> —Give the eligibility criteria, and the sources and methods of selection of participants | 5, 6, 7, 8                                                  |
|                           |        | (b) <i>Cohort study</i> —For matched studies, give matching criteria and number of exposed and unexposed<br><i>Case-control study</i> —For matched studies, give matching criteria and the number of controls per case                                                                                                                                                                                                                                                 | We used a multilevel approach. Matching was Not Applicable. |
| Variables                 | 7      | Clearly define all outcomes, exposures, predictors, potential confounders, and effect modifiers. Give diagnostic criteria, if applicable                                                                                                                                                                                                                                                                                                                               | 7, 8                                                        |
| Data sources/ measurement | 8*     | For each variable of interest, give sources of data and details of methods of assessment (measurement). Describe comparability of assessment methods if there is more than one group                                                                                                                                                                                                                                                                                   | 5, 6, 7, 8, 9                                               |
| Bias                      | 9      | Describe any efforts to address potential sources of bias                                                                                                                                                                                                                                                                                                                                                                                                              | 8, 9,13                                                     |
| Study size                | 10     | Explain how the study size was arrived at                                                                                                                                                                                                                                                                                                                                                                                                                              | 6, 10, 17                                                   |
| Quantitative variables    | 11     | Explain how quantitative variables were handled in the analyses. If applicable, describe which groupings were chosen and why                                                                                                                                                                                                                                                                                                                                           | 8, 9                                                        |
| Statistical methods       | 12     | (a) Describe all statistical methods, including those used to control for confounding                                                                                                                                                                                                                                                                                                                                                                                  | 8, 9                                                        |
|                           |        | (b) Describe any methods used to examine subgroups and interactions                                                                                                                                                                                                                                                                                                                                                                                                    | The quantitative analysis of the                            |



|                  |     |                                                                                                                                                                                                                                                                                                           |                                                                                                       |
|------------------|-----|-----------------------------------------------------------------------------------------------------------------------------------------------------------------------------------------------------------------------------------------------------------------------------------------------------------|-------------------------------------------------------------------------------------------------------|
|                  |     |                                                                                                                                                                                                                                                                                                           | interaction between the different levels of the healthcare system was described on pages 8 and 9.     |
|                  |     | (c) Explain how missing data were addressed                                                                                                                                                                                                                                                               | Not Applicable. We have no missing data.                                                              |
|                  |     | (d) <i>Cohort study</i> —If applicable, explain how loss to follow-up was addressed<br><i>Case-control study</i> —If applicable, explain how matching of cases and controls was addressed<br><i>Cross-sectional study</i> —If applicable, describe analytical methods taking account of sampling strategy | 5, 6,7                                                                                                |
|                  |     | (e) Describe any sensitivity analyses                                                                                                                                                                                                                                                                     | Not Applicable                                                                                        |
| <b>Results</b>   |     |                                                                                                                                                                                                                                                                                                           |                                                                                                       |
| Participants     | 13* | (a) Report numbers of individuals at each stage of study—eg numbers potentially eligible, examined for eligibility, confirmed eligible, included in the study, completing follow-up, and analysed                                                                                                         | 10, 17                                                                                                |
|                  |     | (b) Give reasons for non-participation at each stage                                                                                                                                                                                                                                                      | 6, 7                                                                                                  |
|                  |     | (c) Consider use of a flow diagram                                                                                                                                                                                                                                                                        | 17                                                                                                    |
| Descriptive data | 14* | (a) Give characteristics of study participants (eg demographic, clinical, social) and information on exposures and potential confounders                                                                                                                                                                  | (6, 7, 8), 10, 11, 18                                                                                 |
|                  |     | (b) Indicate number of participants with missing data for each variable of interest                                                                                                                                                                                                                       | Not Applicable. We have no missing data.                                                              |
|                  |     | (c) <i>Cohort study</i> —Summarise follow-up time (eg, average and total amount)                                                                                                                                                                                                                          | 8                                                                                                     |
| Outcome data     | 15* | <i>Cohort study</i> —Report numbers of outcome events or summary measures over time                                                                                                                                                                                                                       | 8, 10, 19, 20, 22                                                                                     |
|                  |     | <i>Case-control study</i> —Report numbers in each exposure category, or summary measures of exposure                                                                                                                                                                                                      | Not Applicable                                                                                        |
|                  |     | <i>Cross-sectional study</i> —Report numbers of outcome events or summary measures                                                                                                                                                                                                                        | Not Applicable                                                                                        |
| Main results     | 16  | (a) Give unadjusted estimates and, if applicable, confounder-adjusted estimates and their precision (eg, 95% confidence interval). Make clear which confounders were adjusted for and why they were included                                                                                              | 9, 10, 11, 12, 13, 18, 19, 21, 22                                                                     |
|                  |     | (b) Report category boundaries when continuous variables were categorized                                                                                                                                                                                                                                 | 9, 10, 13, 18, 19, 20                                                                                 |
|                  |     | (c) If relevant, consider translating estimates of relative risk into absolute risk for a meaningful time period                                                                                                                                                                                          | This is a multilevel study on variation in adherence to clinical guidelines. Therefore the “reporting |

|                          |    |                                                                                                                                                                            |                                                                                                                                           |
|--------------------------|----|----------------------------------------------------------------------------------------------------------------------------------------------------------------------------|-------------------------------------------------------------------------------------------------------------------------------------------|
|                          |    |                                                                                                                                                                            | method” suggested by the checklist (i.e. absolute risk measures) might probably be misleading within this framework.                      |
| Other analyses           | 17 | Report other analyses done—eg analyses of subgroups and interactions, and sensitivity analyses                                                                             | 10, 11, 12, 19, 20, 21                                                                                                                    |
| <b>Discussion</b>        |    |                                                                                                                                                                            |                                                                                                                                           |
| Key results              | 18 | Summarise key results with reference to study objectives                                                                                                                   | 12, 13, 14                                                                                                                                |
| Limitations              | 19 | Discuss limitations of the study, taking into account sources of potential bias or imprecision. Discuss both direction and magnitude of any potential bias                 | 15                                                                                                                                        |
| Interpretation           | 20 | Give a cautious overall interpretation of results considering objectives, limitations, multiplicity of analyses, results from similar studies, and other relevant evidence | 12, 13, 14, 15, 16                                                                                                                        |
| Generalisability         | 21 | Discuss the generalisability (external validity) of the study results                                                                                                      | 15                                                                                                                                        |
| <b>Other information</b> |    |                                                                                                                                                                            |                                                                                                                                           |
| Funding                  | 22 | Give the source of funding and the role of the funders for the present study and, if applicable, for the original study on which the present article is based              | 23 The authors received no specific funding for this research from any funding agency in the public, commercial or not-for-profit sectors |

\*Give information separately for cases and controls in case-control studies and, if applicable, for exposed and unexposed groups in cohort and cross-sectional studies.

**Note:** An Explanation and Elaboration article discusses each checklist item and gives methodological background and published examples of transparent reporting. The STROBE checklist is best used in conjunction with this article (freely available on the Web sites of PLoS Medicine at <http://www.plosmedicine.org/>, Annals of Internal Medicine at <http://www.annals.org/>, and Epidemiology at <http://www.epidem.com/>). Information on the STROBE Initiative is available at [www.strobe-statement.org](http://www.strobe-statement.org).

# BMJ Open

## In-hospital myocardial infarction and adherence to evidence-based drug therapies: a real-world evaluation

|                                 |                                                                                                                                                                                                                                                                                                                                                                                                                                              |
|---------------------------------|----------------------------------------------------------------------------------------------------------------------------------------------------------------------------------------------------------------------------------------------------------------------------------------------------------------------------------------------------------------------------------------------------------------------------------------------|
| Journal:                        | <i>BMJ Open</i>                                                                                                                                                                                                                                                                                                                                                                                                                              |
| Manuscript ID                   | bmjopen-2020-042878.R1                                                                                                                                                                                                                                                                                                                                                                                                                       |
| Article Type:                   | Original research                                                                                                                                                                                                                                                                                                                                                                                                                            |
| Date Submitted by the Author:   | 04-Nov-2020                                                                                                                                                                                                                                                                                                                                                                                                                                  |
| Complete List of Authors:       | Soldati, Salvatore ; Department of Epidemiology, Lazio Regional Health Service<br>Di Martino, Mirko; Department of Epidemiology of the Regional Health Service Lazio<br>Castagno, Davide; Division of Cardiology, Department of Medical Sciences, University of Turin, Turin, Italy<br>Davoli, Marina; Department of Epidemiology, Lazio Regional Health Service<br>Fusco, Danilo; Department of Epidemiology, Lazio Regional Health Service |
| <b>Primary Subject Heading</b>: | Epidemiology                                                                                                                                                                                                                                                                                                                                                                                                                                 |
| Secondary Subject Heading:      | Cardiovascular medicine, Evidence based practice, Health services research, Public health                                                                                                                                                                                                                                                                                                                                                    |
| Keywords:                       | Myocardial infarction < CARDIOLOGY, EPIDEMIOLOGY, Quality in health care < HEALTH SERVICES ADMINISTRATION & MANAGEMENT                                                                                                                                                                                                                                                                                                                       |
|                                 |                                                                                                                                                                                                                                                                                                                                                                                                                                              |

SCHOLARONE™  
Manuscripts



I, the Submitting Author has the right to grant and does grant on behalf of all authors of the Work (as defined in the below author licence), an exclusive licence and/or a non-exclusive licence for contributions from authors who are: i) UK Crown employees; ii) where BMJ has agreed a CC-BY licence shall apply, and/or iii) in accordance with the terms applicable for US Federal Government officers or employees acting as part of their official duties; on a worldwide, perpetual, irrevocable, royalty-free basis to BMJ Publishing Group Ltd ("BMJ") its licensees and where the relevant Journal is co-owned by BMJ to the co-owners of the Journal, to publish the Work in this journal and any other BMJ products and to exploit all rights, as set out in our [licence](#).

The Submitting Author accepts and understands that any supply made under these terms is made by BMJ to the Submitting Author unless you are acting as an employee on behalf of your employer or a postgraduate student of an affiliated institution which is paying any applicable article publishing charge ("APC") for Open Access articles. Where the Submitting Author wishes to make the Work available on an Open Access basis (and intends to pay the relevant APC), the terms of reuse of such Open Access shall be governed by a Creative Commons licence – details of these licences and which [Creative Commons](#) licence will apply to this Work are set out in our licence referred to above.

Other than as permitted in any relevant BMJ Author's Self Archiving Policies, I confirm this Work has not been accepted for publication elsewhere, is not being considered for publication elsewhere and does not duplicate material already published. I confirm all authors consent to publication of this Work and authorise the granting of this licence.

## **In-hospital myocardial infarction and adherence to evidence-based drug therapies: a real-world evaluation**

Salvatore Soldati<sup>1</sup>, Mirko Di Martino<sup>1</sup>, Davide Castagno<sup>2</sup>, Marina Davoli<sup>1</sup>, Danilo Fusco<sup>1</sup>.

(1) Department of Epidemiology, Lazio Regional Health Service, Rome, Italy.

(2) Division of Cardiology, Department of Medical Sciences, University of Turin, Turin, Italy.

*Key Words:* acute myocardial infarction; in-hospital AMI; out-of-hospital AMI; secondary prevention; adherence to poly-therapy.

*Corresponding author:* Mirko Di Martino

Department of Epidemiology, Lazio Regional Health Service, Rome, Italy

E-mail: [m.dimartino@deplazio.it](mailto:m.dimartino@deplazio.it)

## ABSTRACT

**Objectives** This study aimed to measure adherence to chronic poly-therapy following an acute myocardial infarction (AMI) and to find out associations between adherence and the setting of AMI onset (In versus Out of hospital) as well as other determinants.

**Design** Retrospective follow-up study.

**Setting** Population living in the Lazio Region, Italy.

**Participants** This study included 25 779 hospitalized patients with a first diagnosis of AMI in 2012-2016, after the exclusion of those with hospital admission for AMI or related causes in the previous five years.

**Primary and secondary outcome measures** Patients were classified as IH-AMI or OH-AMI according to present-on-admission codes. Adherence was measured based on prescription claims during a 6-month follow-up after hospital discharge, using medication possession ratio (MPR). Adherence to chronic poly-therapy was defined as  $MPR \geq 75\%$  to at least 3 of the following medications: antithrombotics, betablockers, ACE inhibitors/angiotensin receptor blockers (ARB) and statins.

**Results** Among the entire cohort, 1 044 (4%) patients suffered an IH-AMI. Overall, 15 440 (60%) patients were deemed adherent to chronic poly-therapy. Female gender, older age, mental disorders, renal disease, asthma, and ongoing concomitant treatments were factors associated with poor adherence. By contrast, patients with more severe AMI and those already taking evidence-based (E-B) drugs were more likely to be adherent. A strong association between the setting of AMI onset and adherence was observed: IH-AMI patients were 46% less likely to be adherent to E-B medications during their 6-month follow-up as compared to OH-AMI patients (OR=0.54; 95%CI: 0.47-0.62; p-value: <0.001).

**Conclusion** Pharmacotherapy is not consistent with clinical guidelines, especially for IH-AMI patients. Our findings provide evidence on a previously unidentified groups of patients at risk for poor adherence, who might benefit from greater medical attention and dedicated health-care interventions.

## STRENGTHS AND LIMITATIONS OF THIS STUDY

- The population-based design, many patients involved and the integration of health information systems to define and analyse the patient's care pathway.
- This is the first study evaluating the adherence to chronic poly-therapy post AMI, taking into account, the setting of AMI onset (In versus Out of hospital).
- This study uses multilevel modelling techniques to control for any variability on medication adherence attributable to hospitals of discharge.
- Misclassification of drug utilization may have occurred because the dosage instructions were not known, and the defined daily doses were used as the dosage assumption.
- Although all available potential confounders were considered to adjust for differences in patients' characteristics, the possibility of unmeasured confounding remains.

## INTRODUCTION

Most studies investigating acute myocardial infarction (AMI) epidemiology have target patients with AMI admitted via the community emergency medical system or through the emergency department (OH-AMI). Findings from these observational studies have informed risk factors and optimal treatment of AMI, contributing to a progressive reduction in overall mortality and risk of recurrent AMI worldwide [1-2]. It is increasingly recognized, however, that there are patients whose symptoms onset of AMI begin after being hospitalized for other medical conditions [3-4]. Little is known, in literature, about patients experiencing in-hospital AMI (IH-AMI). One such recent study focused on the incidence, risk factors and mortality-outcomes related to IH-AMI [5].

Regardless of the setting of onset of AMI, evidence-based secondary prevention strategies are based on changes in lifestyle and evidence-based drug therapy. With this regard, international guidelines recommend the combined use of drugs belonging to different anatomical therapeutic chemical (ATC) groups including antithrombotic agents,  $\beta$ -blockers, angiotensin-converting enzyme inhibitors (ACEIs), angiotensin receptor blockers (ARBs) and statins [6-7].

Poor medication adherence after AMI is a world-spread problem, which compromises patient outcomes and increases patient mortality. Post-AMI survival benefit deriving from long-term adherence to guidelines recommended poly-therapy has been clearly shown in literature [8-14]. However, observational studies highlighted suboptimal use and poor compliance in the general post-AMI population and in specific subset of affected individuals [11, 14-15].

Moreover, the transition of care from hospital to the community-based setting might also represents an important aspect to be taken into account when assessing medication adherence: patients discharged from a specialized hospital ward (e.g., cardiology, cardiac surgery, coronary care units) were found to be associated with higher adherence rates [14, 16-18]. Typically, the hospital takes care of patients in the “first phase” of follow-up period. After this period, patients are definitively managed by cardiologists in the community-based setting. However, different hospitals have different follow-up protocols, according to the length of follow-up period and frequency of evaluation. These differences in health care delivery generate heterogeneity in the population and raise equity issues in terms of quality and effectiveness of the transition care from the



1  
2  
3 acute setting to the outpatient setting. For these reasons, our research hypothesis is that  
4 the setting in which AMI develops may significantly impact on the probability of being  
5 discharge by specialized hospital wards and, consequently, on the recommended  
6 therapeutic strategies and adherence to them.  
7  
8  
9

10 Therefore, the main objectives of this study were: 1) to measure, in a real world  
11 scenario, the adherence to chronic poly-therapy following an AMI; 2) to identify  
12 determinants of adherence to E-B drugs specifically focusing on the potential  
13 association between setting of onset of AMI (i.e. IH-AMI vs. OHAMI).  
14  
15  
16  
17

18 To the best of our knowledge, no population study attempted to determine whether  
19 poly-therapy after AMI differed in patients who had an AMI during their hospital stay  
20 as compared with those who experienced an out-of-hospital AMI. The identification of  
21 this subgroup of patients may be useful for health planning purposes and could  
22 contribute to better tailor therapeutic interventions to the special needs of this  
23 population.  
24  
25  
26  
27  
28  
29  
30  
31

## 32 **METHODS**

### 33 **Data sources**

34  
35 Our Department has access to health information systems of the Lazio region of Italy  
36 that contain mortality, hospital admission and drug claims data. We collected data from  
37 the Regional Hospital Information Systems (HIS), the Regional Admission and  
38 Discharge Information System (RAD), the Regional Healthcare Emergency Information  
39 System (HEIS), the Mortality Information System and the Regional Drug Dispense  
40 Registry (PHARMA).  
41  
42  
43  
44  
45  
46  
47  
48

49 The HIS is an integrated information system designed to collect clinical and  
50 administrative information regarding hospital admissions for each patient discharged  
51 from public and private hospitals of the Lazio region. The HIS includes patients'  
52 characteristics (single anonymous identifier, gender, date and place of birth, and place  
53 of residence); admission and discharge dates; discharge diagnoses (up to 6); procedure  
54 codes (up to 6) according to the International Classification of Disease, Ninth Revision,  
55 Clinical Modification (ICD-9-CM); hospital admission and discharge ward and a  
56 regional code that corresponds to the admitting facility.  
57  
58  
59  
60

1  
2  
3 Since July 2008 tracking of additional information about hospital discharge record has  
4 been activated in the Lazio region thanks to RAD Information System (corporate  
5 decision nr. D4118). The ministerial directive of December 2010 establishes “the  
6 integration of the HIS with additional mandatory sections for the collection of  
7 additional information about hospital discharge data”. RAD collects additional  
8 information on comorbidities (e.g., time to surgery, the presence of AMI diagnosis code  
9 at hospital admission time). This information is useful to characterize the severity of  
10 patient’s condition at the time of hospitalization or surgery.  
11  
12  
13  
14  
15  
16

17  
18 The HEIS includes all visits occurred in emergency departments of the Lazio region and  
19 collects: patient demographic characteristics, admission information, visit and discharge  
20 dates and hours, ICD-9-CM diagnosis at discharge, reported symptoms on arrival, status  
21 at discharge (e.g., dead, hospitalized, or discharged at home) and triage score.  
22  
23  
24

25  
26 Information on drugs reimbursed by the national healthcare system and dispensed by  
27 public and private pharmacies or by hospital pharmacies at discharge is available from  
28 the Regional Drug Dispense Registry. The data available on each prescription includes  
29 patient's identification number, prescribing physician's number, Anatomical-  
30 Therapeutic-Chemical (ATC) code of the drug purchased, number of packs, number of  
31 units per pack, dosage, unit cost per pack and prescription date.  
32  
33  
34  
35

36  
37 Any date of death was obtained from the Mortality Information System (MIS).  
38

39  
40 Data from different information systems have been integrated using a deterministic  
41 record linkage procedure based on unique and anonymous subject identifier. In this  
42 way, we created a chronological, demographical, residential, clinical, healthcare-related  
43 patient profile.  
44  
45  
46

### 47 **Setting and study cohort**

48  
49 The present observational study was based on the population living in the Lazio region,  
50 Italy. Using data from the regional HIS, the study included a cohort of all patients  
51 discharged from hospitals between 1 January 2012 and 31 December 2016 with a  
52 diagnosis of AMI. AMI was defined according to International Classification of  
53 Diseases Ninth Revision Clinical Modification (ICD-9-CM) codes 410.xx (first or  
54 second diagnosis position). In case of multiple hospital admissions, the first admission  
55 during the study period was defined as the index admission. Subsequent hospitalizations  
56  
57  
58  
59  
60

1  
2  
3 for any reason were recorded, and repeated admissions within 2 days of discharge were  
4 regarded as one single ‘episode of care’.  
5  
6

7 Classification as to whether AMI occurred in-hospital was based on present-on-  
8 admission codes from RAD Information System. Admission code diagnosis was  
9 available in more than 98% of patients with AMI. Patients aged 18–100 years at  
10 discharge were screened for inclusion in the study.  
11  
12  
13

14  
15 Only incident cases of AMI were included: patients with hospital admission for AMI or  
16 related causes (i.e., percutaneous coronary intervention, bypass or surgery of the heart  
17 and great vessels) in the 5 years before index admission were excluded.  
18  
19

20  
21 Patients who were not registered in the regional health assistance file at time of  
22 discharge from hospital were excluded (note that healthcare assistance in Italy is offered  
23 to all resident citizens without restrictions). Finally, patients who had an individual  
24 follow-up shorter than 30 days were excluded, to give all patients the chance to achieve  
25 clinical stability and to guarantee a minimum observation period of one month for  
26 consistently estimate adherence to poly-therapy.  
27  
28  
29  
30

### 31 32 **Patient and Public Involvement**

33  
34  
35 No patient involved.  
36

### 37 38 **Patient characteristics**

39  
40 Patients were characterized according to socio-demographic factors (age, gender),  
41 comorbidities that might contraindicate prescription of specific ATC group drugs,  
42 previous use of E-B drugs, previous use of other (non-E-B) medications, previous  
43 hospitalization with a diagnosis of mental disorders (ICD-9-CM codes: 290-319),  
44 hospital discharge ward and ST-elevation myocardial infarction (STEMI) as indicator of  
45 severity of disease. STEMI patients were identified using ICD-9-CM diagnosis codes  
46 410.xx, excluding 410.7x (non-ST-elevation AMI) and 410.9x (acute AMI, not  
47 otherwise specified) in any diagnostic position. The following diseases were assessed  
48 by health ticket exemption or during hospitalization or emergency department visit for  
49 index admission as well as in the 2 years preceding the beginning of follow-up: asthma  
50 (ICD-9-CM diagnosis code 493), renal disease (ICD-9-CM diagnosis codes: 582-588,  
51 V42.0, V45.1, V56, ICD-9-CM procedure codes: 38.95, 39.95, 54.98, 55.6), sinoatrial  
52 bradycardia (ICD-9-CM diagnosis code 427.8). These clinical conditions might  
53  
54  
55  
56  
57  
58  
59  
60

1  
2  
3 contraindicate drug prescription of specific ATC groups due to potential adverse effects  
4 (e.g.  $\beta$ -blockers in patients suffering from asthma).  
5  
6

7 We used the number of distinct, non-E-B drugs, prescribed in the 6 months preceding  
8 the beginning of follow-up as a crude measure of ongoing concomitant treatments.  
9 Medications with the same first five digits of the ATC code were considered as a group  
10 [19].  
11  
12  
13

14 Moreover, to better define patients' clinical profile, during the 6 months preceding  
15 follow-up initiation, information was also collected on the use of all E-B drugs:  
16 antithrombotic agents,  $\beta$ -blockers, ACEIs, ARBs and statins.  
17  
18  
19

### 20 21 **Follow-up**

22 We evaluated medication use 'immediately' after the acute event, by analyzing  
23 prescription patterns during the 6 months following discharge from the index admission.  
24 Follow-up started the same date of hospital discharge of the index episode of AMI. The  
25 end of follow-up coincided either with the end of 6-month follow-up, the date of death  
26 or with the date of all-cause hospitalization whichever came first. The last 'censoring'  
27 criterion allows one to measure the net impact of the hospital that has discharged the  
28 patient on medication adherence without the potential interference of subsequent  
29 hospitalizations.  
30  
31  
32  
33  
34  
35  
36

### 37 38 **Definition of exposure and outcome.**

39 AMI were classified as IH-AMI or OH-AMI according to "present-on-admission" codes  
40 retrieved using the Regional Admission and Discharge Information System (RAD)  
41 which provides information regarding diagnostic codes (present or absent) at the time of  
42 hospital presentation.  
43  
44  
45  
46  
47

48 The main outcome of the study was adherence to chronic poly-therapy at 6-month  
49 follow-up. All drugs in this study were included in the patients' health care plans and  
50 were equally available to all residents, in accordance with the universal health care  
51 coverage provided to residents of Italy. Information about prescriptions of  
52 antithrombotics (ATC: B01AC06, B01AC04, B01AC05, B01AC22, B01AC24,  
53 B01AF01, B01AF02, B01AF03, B01AA03, B01AA07, B01AE07),  $\beta$ -blockers (ATC:  
54 C07), ACEI/ARBs (ATC: C09), and statins (ATC: C10AA) were retrieved for all  
55 patients. Adherence to medication was measured through the medication possession  
56  
57  
58  
59  
60

1  
2  
3 ratio (MPR), calculated as the number of days of medication supplied during the follow-  
4 up on the basis of defined daily doses (DDDs) divided by the number of calendar days  
5 in the follow-up. Adherence to individual medications was defined as a  $MPR \geq 0.75$ .  
6  
7 Adherence to chronic poly-therapy was defined as a  $MPR \geq 0.75$  for at least three of the  
8 four evidence-based drugs [13,14].  
9  
10  
11  
12  
13  
14

### 15 **Statistical analysis**

16  
17 Data are presented as frequencies and percentages for categorical variables and mean  
18 value  $\pm$  standard deviation for continuous variables. Considering the hierarchical data  
19 structure (patients are nested within hospitals), logistic multilevel models were  
20 performed to take into account potential intra-class correlation. The variance  
21 components were expressed in terms of Median Odds Ratio (MOR), a measure that  
22 quantifies the variability between clusters, in this case between different hospitals of  
23 discharge. The MOR quantifies the variation between clusters by comparing two  
24 persons from two randomly chosen different clusters. Consider two persons with the  
25 same covariates, chosen randomly from two different clusters. MOR is the median odds  
26 ratio between the person of higher propensity and the person of lower propensity. This  
27 measure is always greater than or equal to 1. MOR equal to 1 indicates no variability  
28 between clusters, as the variability between group increases MOR value increases [20].  
29 In a first step, MOR was estimated using an intercept-only model. In a second step,  
30 MOR was estimated controlling for patient characteristics, to ensure that of the  
31 heterogeneity of patients within groups (in terms of age, comorbidities, or severity of  
32 AMI) did not influence the estimates of variance.  
33  
34  
35  
36  
37  
38  
39  
40  
41  
42  
43  
44  
45

46 Logistic multilevel models were also applied to identify determinants of adherence to  
47 evidence-based drugs, considering the correlation within clusters. Determinants of  
48 adherence were selected based on a priori knowledge [21-22]: gender and age,  
49 discharge ward, ST-elevation AMI, use of evidence-based drugs (i.e., antithrombotics,  
50  $\beta$ -blockers, ACEI/ARBs, statins) during the 6 months prior to the index admission  
51 (defined as at least one prescription), ongoing concomitant treatments (i.e., number of  
52 distinct non-evidence-based drugs) and relevant comorbidities retrieved from the  
53 hospital records for both the index admission and the two previous years.  
54  
55  
56  
57  
58  
59  
60

Results were expressed as odds ratios (OR), 95% confidence intervals (95% CI) and p-values. Statistical analyses were carried out using Stata software, version 15 (StataCorp.2015. Stata Statistical Software: Release 15. College Station, TX: StataCorp LP).

## RESULTS

### The study cohort

The flow chart in figure 1 shows the selection process of the study cohort. Of the 34 854 patients discharged from hospital with a first diagnosis of AMI between January 1<sup>st</sup> 2012 and December 31<sup>th</sup> 2016, 25 779 (74%) met the inclusion criteria and were enrolled in the present study. Mean age was 68 years, 17 138 (66%) were male (Table 1). Overall, 11 108 (43%) of patients suffered an AMI with ST segment elevation and the largest number of patients 20 207 (78%) was discharged from cardiology wards. More than 65% of patients had at least a prescription of E-B medications ( $\beta$ -blockers, anti-thrombotics, ACEI/ARBs or statins) during the 6 months prior to the index admission. Overall, more than two thirds of patients were receiving concomitant treatments at the time of AMI and the prevalence of these treatments showed a parallel increase with age.

Among the entire cohort, 1 044 (4.0%) patients suffered an IH-AMI. They were older, had more comorbidities (e.g. renal disease, asthma, and mental disorders) and less frequently had a diagnosis of ST-elevation AMI (31% vs. 44%) compared with patients experiencing an OH-AMI. In addition, the use of at least one E-B medication before hospitalisation was greater amongst patients suffering an IH-AMI compared with OH-AMI (78% vs. 66%). Patients suffering IH-AMI also showed a higher prevalence of ongoing concomitant treatments (number of distinct non-E-B drugs prescribed in the 6 months preceding the beginning of follow-up) and less likely were discharged from cardiology wards (48% vs. 80%).

### Post-AMI adherence to evidence-based medications

The adherence to E-B medications by gender and age group is reported in table 2. Statins were characterised by the highest adherence (78%), followed by antithrombotics (69%), ACEI/ARBs (63%) and  $\beta$ -blockers (50%). Lower adherence was observed



1  
2  
3 among women, most notably for statins and antithrombotics (14 and 12 percentage  
4 points lower than men, respectively). This gender difference was attenuated as age  
5 increased. Older age groups showed lower adherence to all medications. The adherence  
6 to each of the recommended drugs decreased markedly, for both males and females,  
7 moving from the age group '75-84' to the group '85+' years.  
8  
9

10  
11  
12 Overall, 15 440 (60%) patients were adherent to chronic poly-therapy (as per protocol  
13 definition) following an AMI. However, only 6 463 (25%) patients were adherent to the  
14 full combination of E-B treatments considered in this study. Women were less likely to  
15 be treated with a combination of E-B drugs compared with males (51% vs. 64%). This  
16 gender difference was less pronounced as age increased (Table 3).  
17  
18  
19  
20  
21

22 A strong variability in adherence to chronic poly-therapy between different hospitals of  
23 discharge was observed, even after controlling for patients' characteristics. As reported  
24 in table 4 and 5, a higher and statistically significant (p-value: 0.042) variability  
25 amongst discharge hospitals was observed for patients suffering IH-AMI (MOR: 1.57;  
26 95% CI: 1.33-2.06; p-value: 0.019) as compared with OH-AMI (MOR: 1.46; 95% CI:  
27 1.33-1.64; p-value: <0.001).  
28  
29  
30  
31  
32

33 Using logistic multilevel model, determinants of adherence to chronic poly-therapy  
34 were determined (table 6). A lower probability of adherence was observed in women  
35 (OR: 0.75; 95% CI: 0.71-0.79; p-value: <0.001) and elderly patients. With this regard,  
36 the effect of age was not completely linear: with respect to the reference category (age  
37 less than 55 years): the probability of adherence increased in the age group '55-64'  
38 years (OR: 1.12; 95% CI: 1.03-1.22; p-value: 0.007) but decreased, although not  
39 significantly, in the group '65-74' years (OR: 0.98; 95% CI: 0.90-1.07; p-value: 0.618).  
40 A significant drop in the probability of adherence was observed in older age groups  
41 ('75-84' years OR: 0.67; 95% CI: 0.61-0.73; p-value: <0.001,  $\geq 85$  years; OR: 0.40; 95%  
42 CI: 0.35-0.44; p-value: <0.001). A similar trend was observed for the ongoing  
43 concomitant treatments in the six months before index admission.  
44  
45  
46  
47  
48  
49  
50  
51  
52

53 In addition, lower adherence to chronic poly-therapy was observed among patients with  
54 comorbidities. In contrast, a significantly higher adherence to poly-therapy was  
55 observed amongst patients already taking E-B drugs in the 6 months prior index  
56 admission (OR: 1.57; 95% CI: 1.47-1.67; p-value: <0.001) and amongst patients  
57 suffering from an ST-elevation AMI (OR: 1.48; 95% CI: 1.40-1.56; p-value: <0.001).  
58  
59  
60

1  
2  
3 Finally, a lower probability of adherence was observed in patients discharged from  
4 unspecialized hospital wards as compared with those who discharged from cardiology  
5 ward (OR: 0.58; 95% CI: 0.54-0.63; p-value: <0.001).  
6  
7

8  
9 After adjustment for potential confounders (including age, gender, renal disease,  
10 sinoatrial bradycardia, asthma, mental disorders, ST-elevation AMI, ongoing  
11 concomitant treatments and E-B drugs use during the 6 months prior to hospitalization)  
12 patients suffering IH-AMI were 46% less likely to be adherent to poly-therapy as  
13 compared with OH-AMI patients (OR: 0.54; 95% CI: 0.47-0.62; p-value: <0.001).  
14 As summarized in table 7, IH-AMI patients showed significantly lower adherence levels  
15 for three of four E-B drugs, i.e., statins, antithrombotics and ACEI/ARBs. This “gap”  
16 was less significant for Beta-blockers.  
17  
18  
19  
20  
21  
22  
23  
24  
25

## 26 DISCUSSION

### 27 **Prevalence and clinical characteristics of patients with an IH-AMI.**

28  
29 Acute myocardial infarction occurring in patients who have already been admitted to the  
30 hospital for other clinical conditions is an entity that has been poorly investigated so far.  
31 In this study, amongst all the patients experiencing an AMI between January 1<sup>st</sup> 2012  
32 and December 31<sup>th</sup> 2016 in Lazio region (see cohort selection in figure 1), the  
33 proportion of patients with IH-AMI of all patients with AMI was 4.0%. Our study has  
34 several key findings. First, compared with OH-AMI patients, those suffering an IH-  
35 AMI were more often female, older, and less likely to be discharged from cardiology  
36 wards, possibly reflecting a higher burden of comorbidities. Indeed, IH-AMI patients  
37 had more often a history of renal disease, asthma, mental disorders and more frequently  
38 were treated with beta-blockers, antithrombotic agents, ACE-Is/ARBs or statins in the 6  
39 months prior the index event Interestingly, IH-AMI patients less frequently suffered  
40 from a ST-elevation AMI. Much of these findings are concordant with the observations  
41 from a previous study by Zahn et al. [23]. In addition, Maynard et al. [3] reported that  
42 patients who had a AMI while hospitalized for other medical conditions were older,  
43 more likely to have atypical symptoms, and had higher rates of renal disease,  
44 cerebrovascular disease, congestive heart failure, diabetes mellitus, chronic obstructive  
45 pulmonary disease, dementia, and cancer than patients who presented as OH-AMI to the  
46 Department of Veterans Affairs Health System.  
47  
48  
49  
50  
51  
52  
53  
54  
55  
56  
57  
58  
59  
60



1  
2  
3 Second, and possibly even more important, we observed that patients experiencing an  
4 IH-AMI were less likely to be adherent to E-B medications for secondary prevention of  
5 AMI during 6-month follow-up. Moreover IH-AMI patients were more likely to be  
6 discharged from non-cardiological wards and this may have negatively impacted on the  
7 quality of care after the acute event.  
8  
9

### 10 11 12 **Adherence to chronic poly-therapy.** 13

14  
15 Concerning the whole study period, we found that after a hospital discharge for AMI,  
16 only 60% of patients were deemed adherent to poly-therapy in the following 6 months.  
17 Treatments with proven benefit in secondary prevention following an AMI were  
18 underused in this study. This result is alarming if we consider that our definition of  
19 adherence was not very restrictive (i.e. adherence defined as  $MPR \geq 75\%$  for at least  
20 three of the four predefined E-B drugs) and that adherence was evaluated only for the  
21 first 6 months after AMI (adherence should be greater in the initial stages of care and  
22 may decrease over time) [24]. Our findings are consistent with the results of other  
23 investigations, which reported unsatisfactory prescribing rates of E-B therapies after  
24 AMI during different time frames [15] and in different countries [21,22,25].  
25  
26  
27  
28  
29  
30  
31

32  
33 To the best of our knowledge our study was the first to assess, whether adherence  
34 differed between patients who had an IH-AMI as compared with those who experienced  
35 an OH-AMI. Interestingly, the setting of AMI onset had a significant impact on poly-  
36 therapy adherence. In fact, patients who had an AMI during their hospital stay were less  
37 likely to be adherent to chronic poly-therapy compared with patients who had an AMI  
38 outside of the hospital. In crude logistic multilevel model, IH-AMI patients were 53%  
39 less likely to be adherent as compared with OH-AMI patients (OR: 0.47; 95% CI: 0.41-  
40 0.54; p-value: <0.001). After adjustment for potential confounders, this relationship was  
41 only slightly attenuated but remained strongly significant (OR: 0.54; 95% CI: 0.47-0.62;  
42 p-value: <0.001). Moreover, we observed a greater variability in terms of adherence to  
43 multiple recommended secondary prevention therapies for IH-AMI patients. This  
44 finding might reflect the lack of standardized and homogenous clinical care pathways  
45 within hospitals of discharge for patients who have suffered an AMI during  
46 hospitalization for other medical conditions. Of note, estimates were adjusted for all  
47 variables identified as determinants of adherence to poly-therapy such as age, gender,  
48 renal disease, sinoatrial bradycardia, asthma, mental disorders, ST-elevation AMI,  
49 ongoing concomitant treatments and E-B drugs use during the 6 months prior to  
50  
51  
52  
53  
54  
55  
56  
57  
58  
59  
60

1  
2  
3 hospitalisation. Although being discharge from a specialized hospital ward (e.g.,  
4 cardiology, cardiac surgery, coronary care units) was found to be associated with higher  
5 adherence rates, we decided not to adjust for discharge ward because we felt it could be  
6 a proxy for setting of AMI onset. IH-AMI patients were less likely discharged from  
7 cardiology wards (48% vs 80%) and this reflects a different care pathway for those  
8 compared to patients who had an OH-AMI. In this situation, an adjustment for  
9 discharge ward, could have introduced (rather than eliminated) a bias (overadjustment)  
10 [26].  
11  
12  
13  
14  
15  
16

17  
18 We also found that female gender, older age, mental disorders, renal disease, asthma,  
19 and ongoing concomitant treatments were significantly associated with non-adherence  
20 to chronic poly-therapy. Conversely, adherence was positively and significantly  
21 associated with patients who had a severe form of disease (ST-elevation AMI) and  
22 patients who have already begun E-B drugs in the 6 months before index admission.  
23  
24  
25  
26

27  
28 Our findings are consistent with the results of other investigations. It is notable that the  
29 current study demonstrates that women are receiving less optimal medical therapy in all  
30 age groups and all drug categories. The clinical relevance of gender differences varies  
31 by age and type of medication. For example, small differences are observed in the use  
32 of beta-blockers, larger differences are observed in the use of statins. Smolina et al. [27]  
33 confirmed these gender differences and showed that treatment was less often initiated in  
34 women. Older age was also found to be associated with lower adherence in several  
35 previous studies [15,17,18]. A higher prevalence of cognitive disorders, memory  
36 impairment, and limited ability to absorb new information in the elderly population  
37 have been associated with lower adherence [28]. Tuppin et al. [18] reported that  
38 adherence to E-B treatment was decreased significantly by an age greater than 74 years,  
39 confirming our findings. The prescription of complex regimens including multiple drugs  
40 has been widely acknowledged as a barrier to patient adherence [29]: the longer the list  
41 of drugs prescribed, the lower the adherence of patients. Chronic conditions like asthma,  
42 sinoatrial bradycardia and renal disease reduce drug prescription of specific ATC  
43 groups due to adverse effects and contraindications increasing the probability of poor  
44 adherence to chronic poly-therapy. A previous hospitalization with a diagnosis of  
45 mental disorders decreased the odds of adherence: the mechanisms by which mental  
46 disorders can affect adherence may include poor motivation, pessimism about treatment  
47 effectiveness, diminished attention, memory and cognition, decreased self-care, and  
48  
49  
50  
51  
52  
53  
54  
55  
56  
57  
58  
59  
60

1  
2  
3 even intentional self-harm [30]. Moreover, patients suffering from a ST-elevation AMI  
4 or those who had already begun E-B drugs before index AMI were more likely to be  
5 adherent to chronic poly-therapy. The former have had a more severe form of the  
6 disease and were probably more carefully monitored and made aware of the long-term  
7 benefits generated by a continuous and persistent drug treatment. The latter were  
8 already used to the chronic and continuous intake of those drugs that are recommended  
9 for the secondary prevention of AMI, as a sort of “inertial effect”.

### 16 **Strengths and limitations of the study.**

17  
18 The population-based design, many patients involved and the opportunity to integrate  
19 many sources of data to define and analyse the patient’s care pathway are the main  
20 strengths of this study. Moreover, to our knowledge, this is the first study to evaluate  
21 the adherence to E-B medications, considering the setting of AMI onset.

22  
23 However, the results come from a single region in Italy and may not be generalizable to  
24 the other Italian regions due to possible differences in the organization of regional  
25 health care services. This notwithstanding, our results are in line with results of similar  
26 studies carried out in Italy [31]. Moreover, our pharmaceutical database does not  
27 contain information on the prescribed daily doses and adherence to drug treatment was  
28 estimated on the basis of the DDDs [32]. Using DDDs to calculate drug coverage, we  
29 run the risk of not accounting for the real-life dosing of a drug when it is used for other  
30 than its principal indication [33]. Therefore, misclassification of drug utilization may  
31 have occurred because the dosage instructions were not known, and the defined daily  
32 doses were used as the dosage assumption. However, in our study, we tried to overcome  
33 this limitation by considering DDDs of betablockers reviewed by a panel of physicians,  
34 seeing that in secondary prevention post AMI, DDDs are prescribed at lower dosages  
35 than the main therapeutic indication.

36  
37 In addition, MPR method does not depend on whether patients take their medication as  
38 prescribed but depends on the prescription given by physicians. Although we cannot be  
39 sure that patients actually took the drug, collecting their medications from the pharmacy  
40 is a reasonable indication of an intention to continue with therapy: nevertheless, the  
41 results of adherence based on claims data may be overestimated.

42  
43 Finally, although all available potential confounders were included in the models to  
44 adjust for differences in patients’ characteristics, we cannot exclude that the lack of

1  
2  
3 more detailed clinical data might have caused unmeasured confounding. We tried to  
4 counteract this limit by applying several restrictions to obtain a cohort with patients that  
5 were as homogeneous as possible.  
6  
7

## 8 9 **Conclusions.**

10  
11 The availability of information systems offers the opportunity to monitor the quality of  
12 care and identify weaknesses in public health-care systems. Although most attention has  
13 been paid to patients with AMI admitted via the community emergency medical system  
14 or through the emergency department, AMI occurring during hospitalization for other  
15 medical problems is an important clinical problem.  
16  
17

18  
19 The results of our study show that, in clinical practice, pharmacotherapy for secondary  
20 prevention of AMI is not fully consistent with recommended clinical guidelines,  
21 especially for IH-AMI patients. Moreover, a strong association between the setting of  
22 AMI onset and adherence to multiple E-B drugs was observed. Our findings provide  
23 evidence on a previously unidentified groups of patients at risk for poor adherence, who  
24 might benefit from greater medical attention and dedicated health-care interventions.  
25 The data strongly support the need for continued efforts to improve adherence to  
26 chronic poly-therapy post AMI. These findings could also stimulate efforts to  
27 implement hospital strategies to give the same “attention” to IH-AMI patients as OH-  
28 AMI patients. In light of the impressive and highly significant impact of the type of  
29 discharge ward on the adherence to chronic poly-therapy, it is feasible that much of the  
30 “disadvantage” of IH-AMI patients is attributable to the discharge processes, in  
31 particular through how far they support effective transitions in and continuity of care. A  
32 range of policy tools could be appropriate to reduce this gap, for example by planning  
33 differentiated health care transition interventions according to the setting of AMI onset.  
34 However, further studies are needed to confirm this association.  
35  
36  
37  
38  
39  
40  
41  
42  
43  
44  
45  
46  
47  
48  
49  
50  
51  
52  
53  
54  
55  
56  
57  
58  
59  
60

**Figure 1. Cohort selection. Exclusion criteria flow chart**

For peer review only

1  
2  
3  
4  
5  
6  
7  
8  
9  
10  
11  
12  
13  
14  
15  
16  
17  
18  
19  
20  
21  
22  
23  
24  
25  
26  
27  
28  
29  
30  
31  
32  
33  
34  
35  
36  
37  
38  
39  
40  
41  
42  
43  
44  
45  
46  
47  
48  
49  
50  
51  
52  
53  
54  
55  
56  
57  
58  
59  
60

**Table 1. Baseline characteristics of the study cohort**

|                                                            | <b>Total cohort</b>  | <b>IH-AMI</b>       | <b>OH-AMI</b>         |
|------------------------------------------------------------|----------------------|---------------------|-----------------------|
|                                                            | <b>25.779 (100%)</b> | <b>1.044 (4.0%)</b> | <b>24.735 (96.0%)</b> |
|                                                            | <b>N (%)</b>         | <b>N (%)</b>        | <b>N (%)</b>          |
| Age group (years)                                          |                      |                     |                       |
| 18-54                                                      | 4702 (18.24)         | 101 (9.67)          | 4601 (18.6)           |
| 55-64                                                      | 5886 (22.83)         | 149 (14.27)         | 5737 (23.19)          |
| 65-74                                                      | 6387 (24.78)         | 243 (23.28)         | 6144 (24.84)          |
| 75-84                                                      | 6122 (23.75)         | 360 (34.48)         | 5762 (23.29)          |
| 85 +                                                       | 2682 (10.4)          | 191 (18.3)          | 2491 (10.07)          |
| Age, mean(std), years                                      | 67.61 (13.20)        | 73.19 (12.52)       | 67.37 (13.18)         |
| Gender (men)                                               | 17138 (66.48)        | 590 (56.51)         | 16548 (66.9)          |
| ST-elevation AMI                                           | 11108 (43.09)        | 319 (30.56)         | 10789 (43.62)         |
| Renal disease                                              | 2335 (9.06)          | 166 (15.9)          | 2169 (8.77)           |
| Sinoatrial bradycardia                                     | 249 (0.97)           | 10 (0.96)           | 239 (0.97)            |
| Asthma                                                     | 188 (0.73)           | 12 (1.15)           | 176 (0.71)            |
| Mental disorders                                           | 1098 (4.26)          | 97 (9.29)           | 1001 (4.05)           |
| Ongoing concomitant treatments (distinct group of drugs) * |                      |                     |                       |
| 0-1                                                        | 7587 (29.43)         | 180 (17.24)         | 7407 (29.95)          |
| 2-4                                                        | 8507 (33)            | 293 (28.07)         | 8214 (33.21)          |
| 5-7                                                        | 5236 (20.31)         | 272 (26.05)         | 4964 (20.07)          |
| 8-10                                                       | 2688 (10.43)         | 161 (15.42)         | 2527 (10.22)          |
| >10                                                        | 1761 (6.83)          | 138 (13.22)         | 1623 (6.56)           |
| E-B drugs use (at least 1 prescription) *                  | 17083 (66.27)        | 811 (77.68)         | 16272 (65.79)         |
| Discharge ward (cardiology)                                | 20207 (78.39)        | 501 (47.99)         | 19706 (79.67)         |

\*, prescribed in the 6 months preceding the index admission; E-B, evidence-based

**Table 2. Adherence to evidence-based medications by gender and age group**

| Age group<br>(years) | $\beta$ -Blockers<br>(%) | ACEI/ARBs<br>(%) | Antithrombotics<br>(%) | Statins<br>(%) |
|----------------------|--------------------------|------------------|------------------------|----------------|
| <b>Males</b>         |                          |                  |                        |                |
| 18-54                | 55.20                    | 62.50            | 77.18                  | 87.74          |
| 55-64                | 54.41                    | 68.83            | 78.00                  | 88.37          |
| 65-74                | 51.44                    | 68.64            | 74.20                  | 83.74          |
| 75-84                | 45.18                    | 61.81            | 65.80                  | 73.83          |
| 85 +                 | 37.44                    | 50.25            | 54.99                  | 58.93          |
| <b>Total</b>         | <b>51.10</b>             | <b>64.94</b>     | <b>73.20</b>           | <b>82.59</b>   |
| <b>Females</b>       |                          |                  |                        |                |
| 18-54                | 48.95                    | 49.20            | 66.83                  | 76.33          |
| 55-64                | 51.67                    | 61.61            | 68.83                  | 78.97          |
| 65-74                | 52.00                    | 65.37            | 65.27                  | 76.24          |
| 75-84                | 48.92                    | 61.77            | 58.74                  | 67.44          |
| 85 +                 | 40.21                    | 53.99            | 51.69                  | 51.15          |
| <b>Total</b>         | <b>48.34</b>             | <b>59.90</b>     | <b>61.03</b>           | <b>68.81</b>   |
| <b>Whole cohort</b>  |                          |                  |                        |                |
| 18-54                | 54.13                    | 60.21            | 75.39                  | 85.77          |
| 55-64                | 53.84                    | 67.33            | 75.99                  | 86.41          |
| 65-74                | 51.62                    | 67.59            | 71.33                  | 81.34          |
| 75-84                | 46.93                    | 61.79            | 62.50                  | 70.84          |
| 85 +                 | 39.19                    | 52.61            | 52.91                  | 54.03          |
| <b>Total</b>         | <b>50.18</b>             | <b>63.25</b>     | <b>69.12</b>           | <b>77.97</b>   |

ACEI/ARBs, angiotensin-converting enzyme inhibitors/angiotensin receptor blockers

**Table 3. Adherence to chronic poly-therapy by gender and age group**

| Age group<br>(years) | Adherence (%)<br>(MPR $\geq$ 75% at least 3 of 4 E-B drugs) | Adherence (%)<br>(MPR $\geq$ 75% for all 4 E-B drugs) |
|----------------------|-------------------------------------------------------------|-------------------------------------------------------|
| <b>Males</b>         |                                                             |                                                       |
| 18-54                | 67.95                                                       | 32.20                                                 |
| 55-64                | 70.53                                                       | 32.47                                                 |
| 65-74                | 67.12                                                       | 27.72                                                 |
| 75-84                | 54.05                                                       | 20.12                                                 |
| 85 +                 | 39.15                                                       | 11.81                                                 |
| <b>Total</b>         | <b>64.13</b>                                                | <b>27.66</b>                                          |
| <b>Females</b>       |                                                             |                                                       |
| 18-54                | 51.91                                                       | 23.55                                                 |
| 55-64                | 60.64                                                       | 25.67                                                 |
| 65-74                | 58.88                                                       | 24.59                                                 |
| 75-84                | 51.08                                                       | 18.06                                                 |
| 85 +                 | 36.37                                                       | 11.53                                                 |
| <b>Total</b>         | <b>51.49</b>                                                | <b>19.93</b>                                          |
| <b>Whole cohort</b>  |                                                             |                                                       |
| 18-54                | 65.19                                                       | 30.71                                                 |
| 55-64                | 68.47                                                       | 31.06                                                 |
| 65-74                | 64.47                                                       | 26.71                                                 |
| 75-84                | 52.66                                                       | 19.16                                                 |
| 85 +                 | 37.40                                                       | 11.63                                                 |
| <b>Total</b>         | <b>59.89</b>                                                | <b>25.07</b>                                          |



**Table 4. Variation between clusters for OH-AMI patients: the MORs**

| Multilevel model     | Level of analysis | Explanatory variables     | MOR (95% CI)       | p Value |
|----------------------|-------------------|---------------------------|--------------------|---------|
| Two-level regression | (Patients) - HoD  | Intercept only            | 1.71 (1.50 - 2.02) | <0.001  |
| Two-level regression | (Patients) - HoD  | Patient's characteristics | 1.46 (1.33 - 1.64) | <0.001  |

HoD, hospital of discharge; MOR, median odds ratio

**Table 5. Variation between clusters for IH-AMI patients: the MORs**

| Multilevel model     | Level of analysis | Explanatory variables     | MOR (95% CI)       | p Value |
|----------------------|-------------------|---------------------------|--------------------|---------|
| Two-level regression | (Patients) - HoD  | Intercept only            | 1.69 (1.43 - 2.16) | 0.005   |
| Two-level regression | (Patients) - HoD  | Patient's characteristics | 1.57 (1.33 - 2.06) | 0.019   |

HoD, hospital of discharge; MOR, median odds ratio

**Table 6. Association between adherence to chronic poly-therapy and symptom onset (IH-AMI VS. OH-AMI), socio-demographics and clinical characteristics.**

| Category                                                                                                  | Subcategory | OR   | 95% CI      | p Value |
|-----------------------------------------------------------------------------------------------------------|-------------|------|-------------|---------|
| Symptom onset of AMI                                                                                      | OH-AMI      | 1.00 | -           | -       |
|                                                                                                           | IH-AMI      | 0.54 | 0.47 - 0.62 | <0.001  |
| Gender of patient                                                                                         | Male        | 1.00 | -           | -       |
|                                                                                                           | Female      | 0.75 | 0.71 - 0.79 | <0.001  |
| Age group (years)                                                                                         | (18-54)     | 1.00 | -           | -       |
|                                                                                                           | (55-64)     | 1.12 | 1.03 - 1.22 | 0.007   |
|                                                                                                           | (65-74)     | 0.98 | 0.90 - 1.07 | 0.618   |
|                                                                                                           | (75-84)     | 0.67 | 0.61 - 0.73 | <0.001  |
|                                                                                                           | (85 +)      | 0.40 | 0.35 - 0.44 | <0.001  |
| Renal disease                                                                                             | No          | 1.00 | -           | -       |
|                                                                                                           | Yes         | 0.58 | 0.53 - 0.64 | <0.001  |
| Sinoatrial bradycardia                                                                                    | No          | 1.00 | -           | -       |
|                                                                                                           | Yes         | 0.83 | 0.64 - 1.08 | 0.171   |
| Asthma                                                                                                    | No          | 1.00 | -           | -       |
|                                                                                                           | Yes         | 0.51 | 0.37 - 0.69 | <0.001  |
| ST-elevation AMI                                                                                          | No          | 1.00 | -           | -       |
|                                                                                                           | Yes         | 1.48 | 1.40 - 1.56 | <0.001  |
| Ongoing concomitant treatments in the 6 months before index admission (number of distinct group of drugs) | (0-1)       | 1.00 | -           | -       |
|                                                                                                           | (2-4)       | 1.05 | 0.98 - 1.13 | 0.147   |
|                                                                                                           | (5-7)       | 0.92 | 0.84 - 1.00 | 0.055   |
|                                                                                                           | (8-10)      | 0.90 | 0.81 - 0.99 | 0.046   |
|                                                                                                           | (10 +)      | 0.73 | 0.64 - 0.82 | <0.001  |
| E-B drugs use in the 6 months before index admission (at least 1 prescription)                            | No          | 1.00 | -           | -       |
|                                                                                                           | Yes         | 1.57 | 1.47 - 1.67 | <0.001  |
| Mental disorders                                                                                          | No          | 1.00 | -           | -       |
|                                                                                                           | Yes         | 0.72 | 0.63 - 0.82 | <0.001  |

OR, odds ratio; CI, confidence interval; E-B, evidence-based

**Table 7. Adherence to evidence-based medications by the setting of AMI onset**

| Symptom onset of AMI | $\beta$ -Blockers (%) | ACEI/ARBs (%) | Antithrombotics (%) | Statins (%)  |
|----------------------|-----------------------|---------------|---------------------|--------------|
| <b>OH-AMI</b>        | 50.24                 | 63.85         | 69.88               | 78.78        |
| <b>IH-AMI</b>        | 48.66                 | 48.95         | 51.15               | 58.72        |
| <b>Whole cohort</b>  | <b>50.18</b>          | <b>63.25</b>  | <b>69.12</b>        | <b>77.97</b> |

ACEI/ARBs, angiotensin-converting enzyme inhibitors/angiotensin receptor blockers

For peer review only

## CONTRIBUTORSHIP STATEMENT

*Salvatore Soldati* contributed to the concept and design of the study, the acquisition of data from the Lazio regional health information systems, the analysis of data and the statistical methodology required for the analytic modelling, the interpretation of results, and the writing of the article.

*Mirko Di Martino* contributed to the design of the study, the statistical methodology required for the analytic modelling, the interpretation of results, and the writing of the article.

*Davide Castagno* contributed to the clinical interpretation of results, and the writing of the article.

*Marina Davoli* and *Daniilo Fusco* contributed to the design of the study, and the critical revision of the paper for important intellectual content, and they have given their final approval of the version submitted for publication.

All authors agree to be accountable for all aspects of the work and ensure that questions related to the accuracy or integrity of any part of the work were appropriately investigated and resolved.

## COMPETING INTERESTS

The authors declare that they have non-financial associations that may be relevant to the submitted manuscript.

## FUNDING STATEMENT

This research received no specific grant from any funding agency in the public, commercial or not-for-profit sectors.

## DATA SHARING STATEMENT

No additional data are available.

## PRIVACY LAWS

This study was carried out in full compliance with the current privacy laws. The Department of Epidemiology is legitimized by the Lazio Region Committee in

1  
2  
3 managing and analyzing data from the regional health information systems for  
4 epidemiological purposes.  
5  
6  
7  
8  
9  
10  
11  
12  
13  
14  
15  
16  
17  
18  
19  
20  
21  
22  
23  
24  
25  
26  
27  
28  
29  
30  
31  
32  
33  
34  
35  
36  
37  
38  
39  
40  
41  
42  
43  
44  
45  
46  
47  
48  
49  
50  
51  
52  
53  
54  
55  
56  
57  
58  
59  
60

For peer review only

## References

1. Peterson ED, Shah BR, Parsons L, et al. Trends in quality of care for patients with acute myocardial infarction in the National Registry of Myocardial Infarction from 1990 to 2006. *Am Heart J*. 2008; 156(6):1045-1055.
2. Yeh RW, Sidney S, ChandraM, Sorel M, Selby JV, Go AS. Population trends in the incidence and outcomes of acute myocardial infarction. *N Engl J Med*. 2010; 362(23): 2155-2165.
3. Maynard C, Lowy E, Rumsfeld J, et al. The prevalence and outcomes of in-hospital acute myocardial infarction in the Department of Veterans Affairs health system. *Arch Intern Med*. 2006; 166(13): 1410-1416.
4. Erne P, Bertel O, Urban P, Pedrazzini G, Lüscher TF, Radovanovic D; AMIS Plus Investigators. Inpatient versus outpatient onsets of acute myocardial infarction. *Eur J Intern Med*. 2015; 26(6): 414-419.
5. Bradley SM, Borgerding JA, Wood GB, Maynard C, Fihn SD. Incidence, Risk Factors, and Outcomes Associated With In-Hospital Acute Myocardial Infarction. *JAMA Netw Open*. 2019;2(1): e187348.
6. National Institute for Clinical Excellence. Secondary prevention in primary and secondary care for patients following a myocardial infarction. NICE guidelines [CG172]. Published date: November 2013.
7. Smith SC Jr, Benjamin EJ, Bonow RO, Braun LT, Creager MA, et al. AHA/ACCF secondary prevention and risk reduction therapy for patients with coronary and other atherosclerotic vascular disease: 2011 update: a guideline from the American Heart Association and American College of Cardiology Foundation endorsed by the World Heart Federation and the Preventive Cardiovascular Nurses Association. *J Am Coll Cardiol* 2011; 58:2432-46.
8. Choudhry NK, Glynn RJ, Avorn J, et al. Untangling the relationship between medication adherence and post-myocardial infarction outcomes: medication adherence and clinical outcomes. *Am Heart J*. 2014; 167:51–8. e5.
9. Mathews R, Wang W, Kaltenbach LA, Thomas L, Shah RU, Ali M, Peterson ED, Wang TY. Hospital Variation in Adherence Rates to Secondary Prevention

- 1  
2  
3 Medications and the Implications on Quality. *Circulation*. 2018 May  
4 15;137(20):2128-2138.  
5  
6  
7  
8 10. Hamood H, Hamood R, Green MS, Almog R. Effect of adherence to evidence-  
9 based therapy after acute myocardial infarction on all-cause mortality.  
10 *Pharmacoepidemiology Drug Saf*. 2015; 24:1093–104.  
11  
12  
13 11. Gislason GH, Rasmussen JN, Abildstrøm SZ, Gadsbøll N, Buch P, Friberg J,  
14 Rasmussen S, Køber L, Stender S, Madsen M, Torp-Pedersen C. Long-term  
15 compliance with beta-blockers, angiotensin-converting enzyme inhibitors, and  
16 statins after acute myocardial infarction. *Eur Heart J*. 2006 May;27(10):1153-8.  
17  
18  
19 12. Korhonen MJ, Robinson JG, Annis IE, Hickson RP, Bell JS, Hartikainen J, Fang  
20 G. Adherence Tradeoff to Multiple Preventive Therapies and All-Cause  
21 Mortality After Acute Myocardial Infarction. *J Am Coll Cardiol*. 2017. 70:1543-  
22 54  
23  
24  
25 13. Kirchmayer U, Di Martino M, Agabiti N, et al. Effect of evidence-based drug  
26 therapy on long-term outcomes in patients discharged after myocardial  
27 infarction: a nested case–control study in Italy. *Pharmacoepidemiol Drug Saf*  
28 2013; 22: 649–57.  
29  
30  
31 14. Di Martino M, Alagna M, Cappai G, et al. Adherence to evidence-based drug  
32 therapies after myocardial infarction: is geographic variation related to hospital  
33 of discharge or primary care providers? A cross-classified multilevel design.  
34 *BMJ Open*. 2016;6(4): e010926.  
35  
36  
37 15. Kirchmayer U, Agabiti N, Belleudi V, et al. Socio-demographic differences in  
38 adherence to evidence-based drug therapy after hospital discharge from acute  
39 myocardial infarction: a population-based cohort study in Rome, Italy. *J Clin*  
40 *Pharm Ther* 2012; 37: 37–44.  
41  
42  
43 16. Simpson E, Beck C, Richard H, Eisenberg MJ, Pilot L. Drug prescriptions after  
44 acute myocardial infarction: dosage, compliance, and persistence. *American*  
45 *Heart Journal*, 2003; 145(3): 438–444.  
46  
47  
48  
49  
50  
51  
52  
53  
54  
55  
56  
57  
58  
59  
60

- 1  
2  
3 17. Austin PC, Tu JV, Ko DT, Alter DA. Use of evidence-based therapies after  
4 discharge among elderly patients with acute myocardial infarction. *Canadian*  
5 *Medical Association Journal*, 2008; 179(9): 895–900.  
6  
7
- 8  
9 18. Tuppin P, Neumann A, Danchin N, Weill A, Ricordeau P, de Peretti C,  
10 Allemand H. Combined secondary prevention after hospitalization for  
11 myocardial infarction in France: analysis from a large administrative database.  
12 *Archives of Cardiovascular Diseases*, 2009; 102(4): 279–292.  
13  
14
- 15 19. Schneeweiss S, Seeger JD, Maclure M, et al. Performance of comorbidity scores  
16 to control for confounding in epidemiologic studies using claims data. *Am J*  
17 *Epidemiol* 2001; 154 (9): 854 – 864.  
18  
19
- 20 20. Larsen K, Merlo J. Appropriate assessment of neighborhood effects on  
21 individual health: integrating random and fixed effects in multilevel logistic  
22 regression. *American Journal of Epidemiology* 2005; 161: 81-88.  
23  
24
- 25 21. Ho PM, Bryson CL, Rumsfeld JS. Medication adherence: its importance in  
26 cardiovascular outcomes. *Circulation* 2009; 119:3028–35.  
27  
28
- 29 22. Mathews R, Wang TY, Honeycutt E, et al. TRANSLATE-ACS Study  
30 Investigators. Persistence with secondary prevention medications after acute  
31 myocardial infarction: insights from the TRANSLATE-ACS study. *Am Heart J*  
32 2015; 170:62–9.  
33  
34
- 35 23. Zahn R, Schiele R, Seidl K, et al; Maximal Individual Therapy in Acute  
36 Myocardial Infarction (MITRA) Study Group. Acute myocardial infarction  
37 occurring in versus out of the hospital: patient characteristics and clinical  
38 outcome. *J Am Coll Cardiol*. 2000; 35:1820–1826.  
39  
40
- 41 24. Di Martino M, Kirchmayer U, Agabiti N, et al. The impact of time-window bias  
42 on the assessment of the long-term effect of medication adherence: the case of  
43 secondary prevention after myocardial infarction. *BMJ OPEN*, 2015; 5(6):  
44 e007866.  
45  
46
- 47 25. Sanf elix-Gimeno G, Peir  S, Ferreros I, et al. Adherence to evidence-based  
48 therapies after acute coronary syndrome: a retrospective population-based cohort  
49  
50  
51  
52  
53  
54  
55  
56  
57  
58  
59  
60



- 1  
2  
3 study linking hospital, outpatient, and pharmacy health information systems in  
4 Valencia, Spain. *J Manag Care Pharm* 2013; 19:247–57.  
5  
6  
7  
8 26. VanderWeele, Tyler J. On the Relative Nature of Overadjustment and  
9 Unnecessary Adjustment. *Epidemiology* 2009; 20; 496-499.  
10  
11  
12 27. Smolina K, Ball L, Humphries KH, et al. Sex disparities in post-acute  
13 myocardial infarction pharmacologic treatment initiation and adherence:  
14 Problem for young women. *Circ Cardiovasc Qual Outcomes* 2015; 8: 586–592.  
15  
16  
17 28. Sattler ELP, Lee JS, Perri M., III Medication (re)fill adherence measures derived  
18 from pharmacy claims data in older Americans. A review of the literature. *Drugs*  
19 *Aging*. 2013; 30:383–399.  
20  
21  
22  
23 29. Vik SA, Maxwell CJ, Hogan DB. Measurement, correlates, and health outcomes  
24 of medication adherence among seniors. *Ann Pharmacother* 2004; 38:303–12  
25  
26  
27  
28 30. Wang PS, Bohn RL, Knight E, Glynn RJ, Mogun H, Avorn J. Noncompliance  
29 with antihypertensive medications: the impact of depressive symptoms and  
30 psychosocial factors. *J Gen Intern Med* 2002;17(7):504-11.  
31  
32  
33  
34 31. Filippi A, D'Ambrosio G, Giustini SE, et al. Pharmacological treatment after  
35 acute myocardial infarction from 2001 to 2006: a survey in Italian primary care.  
36 *J Cardiovasc Med* 2009; 10: 714–18.  
37  
38  
39  
40 32. World Health Organization, Collaborating Centre for Drug Statistics  
41 Methodology, *Guidelines for ATC classification and DDD assignment 2020*.  
42 Oslo, Norway, 2019.  
43  
44  
45  
46 33. Grimmsmann, T., Himmel, W. Discrepancies between prescribed and defined  
47 daily doses: a matter of patients or drug classes? *Eur J Clin Pharmacol* **67**, 847–  
48 854 (2011).  
49  
50  
51  
52  
53  
54  
55  
56  
57  
58  
59  
60

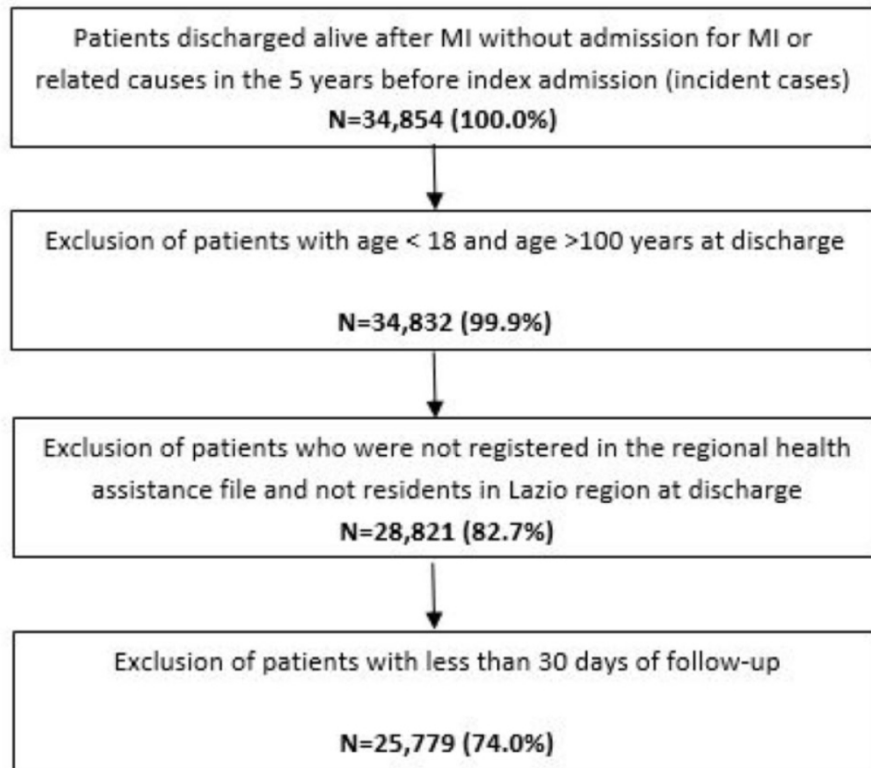

Figure1. Cohort selection. Exclusion criteria flow chart

111x92mm (300 x 300 DPI)

**STROBE 2007 (v4) checklist of items to be included in reports of observational studies in epidemiology\***  
**Checklist for cohort, case-control, and cross-sectional studies (combined)**

| Section/Topic             | Item # | Recommendation                                                                                                                                                                                                                                                                                                                                                                                                                                                         | Reported on page #                                          |
|---------------------------|--------|------------------------------------------------------------------------------------------------------------------------------------------------------------------------------------------------------------------------------------------------------------------------------------------------------------------------------------------------------------------------------------------------------------------------------------------------------------------------|-------------------------------------------------------------|
| Title and abstract        | 1      | (a) Indicate the study's design with a commonly used term in the title or the abstract                                                                                                                                                                                                                                                                                                                                                                                 | 1, 2                                                        |
|                           |        | (b) Provide in the abstract an informative and balanced summary of what was done and what was found                                                                                                                                                                                                                                                                                                                                                                    | 2, 3                                                        |
| <b>Introduction</b>       |        |                                                                                                                                                                                                                                                                                                                                                                                                                                                                        |                                                             |
| Background/rationale      | 2      | Explain the scientific background and rationale for the investigation being reported                                                                                                                                                                                                                                                                                                                                                                                   | 4                                                           |
| Objectives                | 3      | State specific objectives, including any pre-specified hypotheses                                                                                                                                                                                                                                                                                                                                                                                                      | 4, 5                                                        |
| <b>Methods</b>            |        |                                                                                                                                                                                                                                                                                                                                                                                                                                                                        |                                                             |
| Study design              | 4      | Present key elements of study design early in the paper                                                                                                                                                                                                                                                                                                                                                                                                                | 5, 6, 7                                                     |
| Setting                   | 5      | Describe the setting, locations, and relevant dates, including periods of recruitment, exposure, follow-up, and data collection                                                                                                                                                                                                                                                                                                                                        | 5, 6, 7, 8                                                  |
| Participants              | 6      | (a) <i>Cohort study</i> —Give the eligibility criteria, and the sources and methods of selection of participants. Describe methods of follow-up<br><i>Case-control study</i> —Give the eligibility criteria, and the sources and methods of case ascertainment and control selection. Give the rationale for the choice of cases and controls<br><i>Cross-sectional study</i> —Give the eligibility criteria, and the sources and methods of selection of participants | 5, 6, 7, 8                                                  |
|                           |        | (b) <i>Cohort study</i> —For matched studies, give matching criteria and number of exposed and unexposed<br><i>Case-control study</i> —For matched studies, give matching criteria and the number of controls per case                                                                                                                                                                                                                                                 | We used a multilevel approach. Matching was Not Applicable. |
| Variables                 | 7      | Clearly define all outcomes, exposures, predictors, potential confounders, and effect modifiers. Give diagnostic criteria, if applicable                                                                                                                                                                                                                                                                                                                               | 7, 8, 9                                                     |
| Data sources/ measurement | 8*     | For each variable of interest, give sources of data and details of methods of assessment (measurement). Describe comparability of assessment methods if there is more than one group                                                                                                                                                                                                                                                                                   | 5, 6, 7, 8, 9                                               |
| Bias                      | 9      | Describe any efforts to address potential sources of bias                                                                                                                                                                                                                                                                                                                                                                                                              | 7, 8, 9, 13                                                 |
| Study size                | 10     | Explain how the study size was arrived at                                                                                                                                                                                                                                                                                                                                                                                                                              | 6, 7, 10, 17                                                |
| Quantitative variables    | 11     | Explain how quantitative variables were handled in the analyses. If applicable, describe which groupings were chosen and why                                                                                                                                                                                                                                                                                                                                           | 7, 8, 9                                                     |
| Statistical methods       | 12     | (a) Describe all statistical methods, including those used to control for confounding                                                                                                                                                                                                                                                                                                                                                                                  | 9, 10                                                       |
|                           |        | (b) Describe any methods used to examine subgroups and interactions                                                                                                                                                                                                                                                                                                                                                                                                    | The quantitative analysis of the                            |

|                  |     |                                                                                                                                                                                                                                                                                                           |                                                                                                       |
|------------------|-----|-----------------------------------------------------------------------------------------------------------------------------------------------------------------------------------------------------------------------------------------------------------------------------------------------------------|-------------------------------------------------------------------------------------------------------|
|                  |     |                                                                                                                                                                                                                                                                                                           | interaction between the different levels of the healthcare system was described on pages 8 and 9.     |
|                  |     | (c) Explain how missing data were addressed                                                                                                                                                                                                                                                               | Not Applicable. We have no missing data.                                                              |
|                  |     | (d) <i>Cohort study</i> —If applicable, explain how loss to follow-up was addressed<br><i>Case-control study</i> —If applicable, explain how matching of cases and controls was addressed<br><i>Cross-sectional study</i> —If applicable, describe analytical methods taking account of sampling strategy | Not Applicable                                                                                        |
|                  |     | (e) Describe any sensitivity analyses                                                                                                                                                                                                                                                                     | Not Applicable                                                                                        |
| <b>Results</b>   |     |                                                                                                                                                                                                                                                                                                           |                                                                                                       |
| Participants     | 13* | (a) Report numbers of individuals at each stage of study—eg numbers potentially eligible, examined for eligibility, confirmed eligible, included in the study, completing follow-up, and analysed                                                                                                         | 10, 11, 12                                                                                            |
|                  |     | (b) Give reasons for non-participation at each stage                                                                                                                                                                                                                                                      | 10, 17                                                                                                |
|                  |     | (c) Consider use of a flow diagram                                                                                                                                                                                                                                                                        | 10, 17                                                                                                |
| Descriptive data | 14* | (a) Give characteristics of study participants (eg demographic, clinical, social) and information on exposures and potential confounders                                                                                                                                                                  | 10, 11, 12, 18, 19, 20, 21, 22, 23                                                                    |
|                  |     | (b) Indicate number of participants with missing data for each variable of interest                                                                                                                                                                                                                       | Not Applicable. We have no missing data.                                                              |
|                  |     | (c) <i>Cohort study</i> —Summarise follow-up time (eg, average and total amount)                                                                                                                                                                                                                          | Not Applicable                                                                                        |
| Outcome data     | 15* | <i>Cohort study</i> —Report numbers of outcome events or summary measures over time                                                                                                                                                                                                                       | 10, 11, 12, 21, 23                                                                                    |
|                  |     | <i>Case-control study</i> —Report numbers in each exposure category, or summary measures of exposure                                                                                                                                                                                                      | Not Applicable                                                                                        |
|                  |     | <i>Cross-sectional study</i> —Report numbers of outcome events or summary measures                                                                                                                                                                                                                        | Not Applicable                                                                                        |
| Main results     | 16  | (a) Give unadjusted estimates and, if applicable, confounder-adjusted estimates and their precision (eg, 95% confidence interval). Make clear which confounders were adjusted for and why they were included                                                                                              | 11, 12, 13, 22, 23                                                                                    |
|                  |     | (b) Report category boundaries when continuous variables were categorized                                                                                                                                                                                                                                 | 11, 12, 18, 23                                                                                        |
|                  |     | (c) If relevant, consider translating estimates of relative risk into absolute risk for a meaningful time period                                                                                                                                                                                          | This is a multilevel study on variation in adherence to clinical guidelines. Therefore the “reporting |

|                          |    |                                                                                                                                                                            |                                                                                                                          |
|--------------------------|----|----------------------------------------------------------------------------------------------------------------------------------------------------------------------------|--------------------------------------------------------------------------------------------------------------------------|
|                          |    |                                                                                                                                                                            | method” suggested by the checklist (i.e. absolute risk measures) might probably be misleading within this framework.     |
| Other analyses           | 17 | Report other analyses done—eg analyses of subgroups and interactions, and sensitivity analyses                                                                             | 11, 12, 19, 20, 22                                                                                                       |
| <b>Discussion</b>        |    |                                                                                                                                                                            |                                                                                                                          |
| Key results              | 18 | Summarise key results with reference to study objectives                                                                                                                   | 12, 13, 14, 15                                                                                                           |
| Limitations              | 19 | Discuss limitations of the study, taking into account sources of potential bias or imprecision. Discuss both direction and magnitude of any potential bias                 | 15, 16                                                                                                                   |
| Interpretation           | 20 | Give a cautious overall interpretation of results considering objectives, limitations, multiplicity of analyses, results from similar studies, and other relevant evidence | 12, 13, 14, 15, 16                                                                                                       |
| Generalisability         | 21 | Discuss the generalisability (external validity) of the study results                                                                                                      | 15                                                                                                                       |
| <b>Other information</b> |    |                                                                                                                                                                            |                                                                                                                          |
| Funding                  | 22 | Give the source of funding and the role of the funders for the present study and, if applicable, for the original study on which the present article is based              | 24 This research received no specific grant from any funding agency in the public, commercial or not-for-profit sectors. |

\*Give information separately for cases and controls in case-control studies and, if applicable, for exposed and unexposed groups in cohort and cross-sectional studies.

**Note:** An Explanation and Elaboration article discusses each checklist item and gives methodological background and published examples of transparent reporting. The STROBE checklist is best used in conjunction with this article (freely available on the Web sites of PLoS Medicine at <http://www.plosmedicine.org/>, Annals of Internal Medicine at <http://www.annals.org/>, and Epidemiology at <http://www.epidem.com/>). Information on the STROBE Initiative is available at [www.strobe-statement.org](http://www.strobe-statement.org).

# BMJ Open

## In-hospital myocardial infarction and adherence to evidence-based drug therapies: a real-world evaluation

|                                 |                                                                                                                                                                                                                                                                                                                                                                                                                                              |
|---------------------------------|----------------------------------------------------------------------------------------------------------------------------------------------------------------------------------------------------------------------------------------------------------------------------------------------------------------------------------------------------------------------------------------------------------------------------------------------|
| Journal:                        | <i>BMJ Open</i>                                                                                                                                                                                                                                                                                                                                                                                                                              |
| Manuscript ID                   | bmjopen-2020-042878.R2                                                                                                                                                                                                                                                                                                                                                                                                                       |
| Article Type:                   | Original research                                                                                                                                                                                                                                                                                                                                                                                                                            |
| Date Submitted by the Author:   | 08-Dec-2020                                                                                                                                                                                                                                                                                                                                                                                                                                  |
| Complete List of Authors:       | Soldati, Salvatore ; Department of Epidemiology, Lazio Regional Health Service<br>Di Martino, Mirko; Department of Epidemiology of the Regional Health Service Lazio<br>Castagno, Davide; Division of Cardiology, Department of Medical Sciences, University of Turin, Turin, Italy<br>Davoli, Marina; Department of Epidemiology, Lazio Regional Health Service<br>Fusco, Danilo; Department of Epidemiology, Lazio Regional Health Service |
| <b>Primary Subject Heading</b>: | Epidemiology                                                                                                                                                                                                                                                                                                                                                                                                                                 |
| Secondary Subject Heading:      | Cardiovascular medicine, Evidence based practice, Health services research, Public health                                                                                                                                                                                                                                                                                                                                                    |
| Keywords:                       | Myocardial infarction < CARDIOLOGY, EPIDEMIOLOGY, Quality in health care < HEALTH SERVICES ADMINISTRATION & MANAGEMENT                                                                                                                                                                                                                                                                                                                       |
|                                 |                                                                                                                                                                                                                                                                                                                                                                                                                                              |

SCHOLARONE™  
Manuscripts



I, the Submitting Author has the right to grant and does grant on behalf of all authors of the Work (as defined in the below author licence), an exclusive licence and/or a non-exclusive licence for contributions from authors who are: i) UK Crown employees; ii) where BMJ has agreed a CC-BY licence shall apply, and/or iii) in accordance with the terms applicable for US Federal Government officers or employees acting as part of their official duties; on a worldwide, perpetual, irrevocable, royalty-free basis to BMJ Publishing Group Ltd ("BMJ") its licensees and where the relevant Journal is co-owned by BMJ to the co-owners of the Journal, to publish the Work in this journal and any other BMJ products and to exploit all rights, as set out in our [licence](#).

The Submitting Author accepts and understands that any supply made under these terms is made by BMJ to the Submitting Author unless you are acting as an employee on behalf of your employer or a postgraduate student of an affiliated institution which is paying any applicable article publishing charge ("APC") for Open Access articles. Where the Submitting Author wishes to make the Work available on an Open Access basis (and intends to pay the relevant APC), the terms of reuse of such Open Access shall be governed by a Creative Commons licence – details of these licences and which [Creative Commons](#) licence will apply to this Work are set out in our licence referred to above.

Other than as permitted in any relevant BMJ Author's Self Archiving Policies, I confirm this Work has not been accepted for publication elsewhere, is not being considered for publication elsewhere and does not duplicate material already published. I confirm all authors consent to publication of this Work and authorise the granting of this licence.

## **In-hospital myocardial infarction and adherence to evidence-based drug therapies: a real-world evaluation**

Salvatore Soldati<sup>1</sup>, Mirko Di Martino<sup>1</sup>, Davide Castagno<sup>2</sup>, Marina Davoli<sup>1</sup>, Danilo Fusco<sup>1</sup>.

(1) Department of Epidemiology, Lazio Regional Health Service, Rome, Italy.

(2) Division of Cardiology, Department of Medical Sciences, University of Turin, Turin, Italy.

*Key Words:* acute myocardial infarction; in-hospital AMI; out-of-hospital AMI; secondary prevention; adherence to poly-therapy.

*Corresponding author:* Mirko Di Martino

Department of Epidemiology, Lazio Regional Health Service, Rome, Italy

E-mail: [m.dimartino@deplazio.it](mailto:m.dimartino@deplazio.it)



## ABSTRACT

**Objectives** This study aimed to measure adherence to chronic poly-therapy following an acute myocardial infarction (AMI) and to find out associations between adherence and the setting of AMI onset (In versus Out of hospital) as well as other determinants.

**Design** Retrospective follow-up study.

**Setting** Population living in the Lazio Region, Italy.

**Participants** This study included 25 779 hospitalized patients with a first diagnosis of AMI in 2012-2016, after the exclusion of those with hospital admission for AMI or related causes in the previous five years.

**Primary and secondary outcome measures** Patients were classified as IH-AMI or OH-AMI according to present-on-admission codes. Adherence was measured based on prescription claims during a 6-month follow-up after hospital discharge, using medication possession ratio (MPR). Adherence to chronic poly-therapy was defined as  $MPR \geq 75\%$  to at least 3 of the following medications: antithrombotics, betablockers, ACE inhibitors/angiotensin receptor blockers (ARB) and statins.

**Results** Among the entire cohort, 1 044 (4%) patients suffered IH-AMI. Overall, 15 440 (60%) patients were deemed adherent to chronic poly-therapy. Female gender, older age, mental disorders, renal disease, asthma, and ongoing concomitant treatments were factors associated with poor adherence. By contrast, patients with more severe AMI and those already taking evidence-based (E-B) drugs were more likely to be adherent. A strong association between the setting of AMI onset and adherence was observed: IH-AMI patients were 46% less likely to be adherent to E-B medications during their 6-month follow-up as compared to OH-AMI patients (OR=0.54; 95%CI: 0.47-0.62; p-value: <0.001).

**Conclusion** Pharmacotherapy is not consistent with clinical guidelines, especially for IH-AMI patients. Our findings provide evidence on a previously unidentified groups of patients at risk for poor adherence, who might benefit from greater medical attention and dedicated health-care interventions.

## STRENGTHS AND LIMITATIONS OF THIS STUDY

- The population-based design, many patients involved and the integration of health information systems to define and analyse the patient's care pathway.
- This is the first study evaluating the adherence to chronic poly-therapy post AMI, taking into account, the setting of AMI onset (In versus Out of hospital).
- This study uses multilevel modelling techniques to control for any variability on medication adherence attributable to hospitals of discharge.
- Misclassification of drug utilization may have occurred because the dosage instructions were not known, and the defined daily doses were used as the dosage assumption.
- Although all available potential confounders were considered to adjust for differences in patients' characteristics, the possibility of unmeasured confounding remains.

## INTRODUCTION

Most studies investigating acute myocardial infarction (AMI) epidemiology have target patients with AMI admitted via the community emergency medical system or through the emergency department (OH-AMI). Findings from these observational studies have informed risk factors and optimal treatment of AMI, contributing to a progressive reduction in overall mortality and risk of recurrent AMI worldwide [1-2]. It is increasingly recognized, however, that there are patients whose symptoms onset of AMI begin after being hospitalized for other medical conditions [3-4]. Little is known, in literature, about patients experiencing in-hospital AMI (IH-AMI). One such recent study focused on the incidence, risk factors and mortality-outcomes related to IH-AMI [5].

Regardless of the setting of onset of AMI, evidence-based secondary prevention strategies are based on changes in lifestyle and evidence-based drug therapy. With this regard, international guidelines recommend the combined use of drugs belonging to different anatomical therapeutic chemical (ATC) groups including antithrombotic agents,  $\beta$ -blockers, angiotensin-converting enzyme inhibitors (ACEIs), angiotensin receptor blockers (ARBs) and statins [6-7].

Poor medication adherence after AMI is a world-spread problem, which compromises patient outcomes and increases patient mortality. Post-AMI survival benefit deriving from long-term adherence to guidelines recommended poly-therapy has been clearly shown in literature [8-14]. However, observational studies highlighted suboptimal use and poor compliance in the general post-AMI population and in specific subset of affected individuals [11, 14-15].

Moreover, the transition of care from hospital to the community-based setting might also represents an important aspect to be taken into account when assessing medication adherence: patients discharged from a specialized hospital ward (e.g., cardiology, cardiac surgery, coronary care units) were found to be associated with higher adherence rates [14, 16-18]. Typically, the hospital takes care of patients in the “first phase” of follow-up period. After this period, patients are definitively managed by cardiologists in the community-based setting. However, different hospitals have different follow-up protocols, according to the length of follow-up period and frequency of evaluation. These differences in health care delivery generate heterogeneity in the population and raise equity issues in terms of quality and effectiveness of the transition care from the

1  
2  
3 acute setting to the outpatient setting. For these reasons, our research hypothesis is that  
4 the setting in which AMI develops may significantly impact on the probability of being  
5 discharge by specialized hospital wards and, consequently, on the recommended  
6 therapeutic strategies and adherence to them.  
7  
8  
9

10  
11 Therefore, the main objectives of this study were: 1) to measure, in a real-world  
12 scenario, the adherence to chronic poly-therapy following an AMI; 2) to identify  
13 determinants of adherence to E-B drugs specifically focusing on the potential  
14 association between setting of onset of AMI (i.e., IH-AMI vs. OHAMI).  
15  
16  
17  
18  
19  
20

## 21 **METHODS**

### 22 **Data sources**

23  
24 Our Department has access to health information systems of the Lazio region of Italy  
25 that contain mortality, hospital admission and drug claims data. We collected data from  
26 the Regional Hospital Information Systems (HIS), the Regional Admission and  
27 Discharge Information System (RAD), the Regional Healthcare Emergency Information  
28 System (HEIS), the Mortality Information System and the Regional Drug Dispense  
29 Registry (PHARMA).  
30  
31  
32  
33  
34  
35  
36

37 The HIS is an integrated information system designed to collect clinical and  
38 administrative information regarding hospital admissions for each patient discharged  
39 from public and private hospitals of the Lazio region. The HIS includes patients'  
40 characteristics (single anonymous identifier, gender, date and place of birth, and place  
41 of residence); admission and discharge dates; discharge diagnoses (up to 6); procedure  
42 codes (up to 6) according to the International Classification of Disease, Ninth Revision,  
43 Clinical Modification (ICD-9-CM); hospital admission and discharge ward and a  
44 regional code that corresponds to the admitting facility.  
45  
46  
47  
48  
49  
50  
51

52 Since July 2008 tracking of additional information about hospital discharge record has  
53 been activated in the Lazio region thanks to RAD Information System (corporate  
54 decision nr. D4118). The ministerial directive of December 2010 establishes "the  
55 integration of the HIS with additional mandatory sections for the collection of  
56 additional information about hospital discharge data". RAD collects additional  
57 information on comorbidities (e.g., time to surgery, the presence of AMI diagnosis code  
58  
59  
60

1  
2  
3 at hospital admission time). This information is useful to characterize the severity of  
4 patient's condition at the time of hospitalization or surgery. These additional data are  
5 inserted into the RAD forms at the time of patient's hospital discharge, when the  
6 diagnostic and therapeutic care pathways are clearly defined.  
7  
8  
9

10  
11 The HEIS includes all visits occurred in emergency departments of the Lazio region and  
12 collects patient demographic characteristics, admission information, visit and discharge  
13 dates and hours, ICD-9-CM diagnosis at discharge, reported symptoms on arrival, status  
14 at discharge (e.g., dead, hospitalized, or discharged at home) and triage score.  
15  
16  
17

18  
19 Information on drugs reimbursed by the national healthcare system and dispensed by  
20 public and private pharmacies or by hospital pharmacies at discharge is available from  
21 the Regional Drug Dispense Registry. The data available on each prescription includes  
22 patient's identification number, prescribing physician's number, Anatomical-  
23 Therapeutic-Chemical (ATC) code of the drug purchased, number of packs, number of  
24 units per pack, dosage, unit cost per pack and prescription date.  
25  
26  
27  
28

29  
30 Any date of death was obtained from the Mortality Information System (MIS).  
31

32  
33 Data from different information systems have been integrated using a deterministic  
34 record linkage procedure based on unique and anonymous subject identifier. In this  
35 way, we created a chronological, demographical, residential, clinical, healthcare-related  
36 patient profile.  
37  
38  
39

#### 40 **Setting and study cohort**

41  
42 The present observational study was based on the population living in the Lazio region,  
43 Italy. Using data from the regional HIS, the study included a cohort of all patients  
44 discharged from hospitals between 1 January 2012 and 31 December 2016 with a  
45 diagnosis of AMI. AMI was defined according to International Classification of  
46 Diseases Ninth Revision Clinical Modification (ICD-9-CM) codes 410.xx (first or  
47 second diagnosis position). In case of multiple hospital admissions, the first admission  
48 during the study period was defined as the index admission. Subsequent hospitalizations  
49 for any reason were recorded, and repeated admissions within 2 days of discharge were  
50 regarded as one single 'episode of care'.  
51  
52  
53  
54  
55  
56  
57  
58

59  
60 Classification as to whether AMI occurred in-hospital was based on present-on-  
admission codes from RAD Information System, which provides information regarding

1  
2  
3 diagnostic codes (present, absent, presence cannot be deduced from clinical  
4 documentation, not applicable) at the time of hospital presentation. AMI patients with  
5 admission code diagnosis (present) were classified as OH-AMI, patients without  
6 admission code diagnosis (absent) were classified as IH-AMI. Admission code  
7 diagnosis (present or absent) was available in more than 98% of AMI patients. To  
8 improve identification of unambiguously IH-onset AMI, we excluded patients with  
9 unclear admission code diagnosis (“presence cannot be deduced from clinical  
10 documentation” or “not applicable”). In such manner, we should be able to reduce the  
11 possible misclassification of exposure due to critical situations, in which patients may  
12 have ambiguous diagnosis at the time of hospital admission.  
13  
14  
15  
16  
17  
18  
19

20  
21 Patients aged 18–100 years at discharge were screened for inclusion in the study. Only  
22 incident cases of AMI were included: patients with hospital admission for AMI or  
23 related causes (i.e., percutaneous coronary intervention, bypass or surgery of the heart  
24 and great vessels) in the 5 years before index admission were excluded.  
25  
26  
27  
28

29 Patients who were not registered in the regional health assistance file at time of  
30 discharge from hospital were excluded (note that healthcare assistance in Italy is offered  
31 to all resident citizens without restrictions). Finally, patients who had an individual  
32 follow-up shorter than 30 days were excluded, to give all patients the chance to achieve  
33 clinical stability and to guarantee a minimum observation period of one month for  
34 consistently estimate adherence to poly-therapy.  
35  
36  
37  
38  
39

#### 40 **Patient and Public Involvement**

41  
42 No patient involved.  
43  
44

#### 45 **Patient characteristics**

46  
47 Patients were characterized according to socio-demographic factors (age, gender),  
48 comorbidities that might contraindicate prescription of specific ATC group drugs,  
49 previous use of E-B drugs, previous use of other (non-E-B) medications, previous  
50 hospitalization with a diagnosis of mental disorders (ICD-9-CM codes: 290-319),  
51 hospital discharge ward and ST-elevation myocardial infarction (STEMI) as indicator of  
52 severity of disease. STEMI patients were identified using ICD-9-CM diagnosis codes  
53 410.xx, excluding 410.7x (non-ST-elevation AMI) and 410.9x (acute AMI, not  
54 otherwise specified) in any diagnostic position. The following diseases were assessed  
55  
56  
57  
58  
59  
60

1  
2  
3 by health ticket exemption or during hospitalization or emergency department visit for  
4 index admission as well as in the 2 years preceding the beginning of follow-up: asthma  
5 (ICD-9-CM diagnosis code 493), renal disease (ICD-9-CM diagnosis codes: 582-588,  
6 V42.0, V45.1, V56, ICD-9-CM procedure codes: 38.95, 39.95, 54.98, 55.6), sinoatrial  
7 bradycardia (ICD-9-CM diagnosis code 427.8). These clinical conditions might  
8 contraindicate drug prescription of specific ATC groups due to potential adverse effects  
9 (e.g.,  $\beta$ -blockers in patients suffering from asthma).

10  
11 We used the number of distinct, non-E-B drugs, prescribed in the 6 months preceding  
12 the beginning of follow-up as a crude measure of ongoing concomitant treatments.  
13 Medications with the same first five digits of the ATC code were considered as a group  
14 [19].

15  
16 Moreover, to better define patients' clinical profile, during the 6 months preceding  
17 follow-up initiation, information was also collected on the use of all E-B drugs:  
18 antithrombotic agents,  $\beta$ -blockers, ACEIs, ARBs and statins.

### 19 20 21 22 23 24 25 26 27 28 29 30 31 **Follow-up**

32 We evaluated medication use 'immediately' after the acute event, by analyzing  
33 prescription patterns during the 6 months following discharge from the index admission.  
34 Follow-up started the same date of hospital discharge of the index episode of AMI. The  
35 end of follow-up coincided either with the end of 6-month follow-up, the date of death  
36 or with the date of all-cause hospitalization whichever came first. The last 'censoring'  
37 criterion allows one to measure the net impact of the hospital that has discharged the  
38 patient on medication adherence without the potential interference of subsequent  
39 hospitalizations.

### 40 41 42 43 44 45 46 47 48 49 50 51 52 53 54 55 56 57 58 59 60 **Definition of exposure and outcome.**

AMI were classified as IH-AMI or OH-AMI according to "present-on-admission" codes  
retrieved using the Regional Admission and Discharge Information System (RAD)  
which provides information regarding diagnostic codes (present or absent) at the time of  
hospital presentation.

The main outcome of the study was adherence to chronic poly-therapy at 6-month  
follow-up. All drugs in this study were included in the patients' health care plans and  
were equally available to all residents, in accordance with the universal health care



1  
2  
3 coverage provided to residents of Italy. Information about prescriptions of  
4 antithrombotics (ATC: B01AC06, B01AC04, B01AC05, B01AC22, B01AC24,  
5 B01AF01, B01AF02, B01AF03, B01AA03, B01AA07, B01AE07),  $\beta$ -blockers (ATC:  
6 C07), ACEI/ARBs (ATC: C09), and statins (ATC: C10AA) were retrieved for all  
7 patients. Adherence to medication was measured through the medication possession  
8 ratio (MPR), calculated as the number of days of medication supplied during the follow-  
9 up on the basis of defined daily doses (DDDs) divided by the number of calendar days  
10 in the follow-up. Adherence to individual medications was defined as a  $MPR \geq 0.75$ .  
11 Adherence to chronic poly-therapy was defined as a  $MPR \geq 0.75$  for at least three of the  
12 four evidence-based drugs [13,14].  
13  
14  
15  
16  
17  
18  
19  
20  
21  
22  
23

### 24 **Statistical analysis**

25  
26 Data are presented as frequencies and percentages for categorical variables and mean  
27 value  $\pm$  standard deviation for continuous variables. Considering the hierarchical data  
28 structure (patients are nested within hospitals), logistic multilevel models were  
29 performed to take into account potential intra-class correlation. The variance  
30 components were expressed in terms of Median Odds Ratio (MOR), a measure that  
31 quantifies the variability between clusters, in this case between different hospitals of  
32 discharge. The MOR quantifies the variation between clusters by comparing two  
33 persons from two randomly chosen different clusters. Consider two persons with the  
34 same covariates, chosen randomly from two different clusters. MOR is the median odds  
35 ratio between the person of higher propensity and the person of lower propensity. This  
36 measure is always greater than or equal to 1. MOR equal to 1 indicates no variability  
37 between clusters, as the variability between group increases MOR value increases [20].  
38 In a first step, MOR was estimated using an intercept-only model. In a second step,  
39 MOR was estimated controlling for patient characteristics, to ensure that of the  
40 heterogeneity of patients within groups (in terms of age, comorbidities, or severity of  
41 AMI) did not influence the estimates of variance.  
42  
43  
44  
45  
46  
47  
48  
49  
50  
51  
52  
53

54  
55 Logistic multilevel models were also applied to identify determinants of adherence to  
56 evidence-based drugs, considering the correlation within clusters. Determinants of  
57 adherence were selected based on a priori knowledge [21-22]: gender and age,  
58 discharge ward, ST-elevation AMI, use of evidence-based drugs (i.e., antithrombotics,  
59  
60



1  
2  
3  $\beta$ -blockers, ACEI/ARBs, statins) during the 6 months prior to the index admission  
4 (defined as at least one prescription), ongoing concomitant treatments (i.e., number of  
5 distinct non-evidence-based drugs) and relevant comorbidities retrieved from the  
6 hospital records for both the index admission and the two previous years.  
7  
8  
9

10  
11 Results were expressed as odds ratios (OR), 95% confidence intervals (95% CI) and p-  
12 values. Statistical analyses were carried out using Stata software, version 15  
13 (StataCorp.2015. Stata Statistical Software: Release 15. College Station, TX: StataCorp  
14 LP).  
15  
16  
17  
18  
19  
20

## 21 RESULTS

### 22 The study cohort

23  
24  
25  
26 The flow chart in Figure 1 shows the selection process of the study cohort. Of the 34  
27 854 patients discharged from hospital with a first diagnosis of AMI between January 1<sup>st</sup>  
28 2012 and December 31<sup>th</sup> 2016, 25 779 (74%) met the inclusion criteria and were  
29 enrolled in the present study. Mean age was 68 years, 17 138 (66%) were male (Table  
30 1). Overall, 11 108 (43%) of patients suffered an AMI with ST segment elevation and  
31 the largest number of patients 20 207 (78%) was discharged from cardiology wards.  
32 More than 65% of patients had at least a prescription of E-B medications ( $\beta$ -blockers,  
33 anti-thrombotics, ACEI/ARBs or statins) during the 6 months prior to the index  
34 admission. Overall, more than two thirds of patients were receiving concomitant  
35 treatments at the time of AMI and the prevalence of these treatments showed a parallel  
36 increase with age.  
37  
38  
39  
40  
41  
42  
43  
44  
45

46 Among the entire cohort, 1 044 (4.0%) patients suffered an IH-AMI. They were older,  
47 had more comorbidities (e.g., renal disease, asthma, and mental disorders) and less  
48 frequently had a diagnosis of ST-elevation AMI (31% vs. 44%) compared with patients  
49 experiencing an OH-AMI. In addition, the use of at least one E-B medication before  
50 hospitalisation was greater amongst patients suffering an IH-AMI compared with OH-  
51 AMI (78% vs. 66%). Patients suffering IH-AMI also showed a higher prevalence of  
52 ongoing concomitant treatments (number of distinct non-E-B drugs prescribed in the 6  
53 months preceding the beginning of follow-up) and less likely were discharged from  
54 cardiology wards (48% vs. 80%).  
55  
56  
57  
58  
59  
60

### Post-AMI adherence to evidence-based medications

The adherence to E-B medications by gender and age group is reported in Table 2. Statins were characterised by the highest adherence (78%), followed by antithrombotics (69%), ACEI/ARBs (63%) and  $\beta$ -blockers (50%). Lower adherence was observed among women, most notably for statins and antithrombotics (14 and 12 percentage points lower than men, respectively). This gender difference was attenuated as age increased. Older age groups showed lower adherence to all medications. The adherence to each of the recommended drugs decreased markedly, for both males and females, moving from the age group '75-84' to the group '85+' years.

Overall, 15 440 (60%) patients were adherent to chronic poly-therapy (as per protocol definition) following an AMI. However, only 6 463 (25%) patients were adherent to the full combination of E-B treatments considered in this study. Women were less likely to be treated with a combination of E-B drugs compared with males (51% vs. 64%). This gender difference was less pronounced as age increased (Table 3).

A strong variability in adherence to chronic poly-therapy between different hospitals of discharge was observed, even after controlling for patients' characteristics. As reported in Table 4 and 5, a higher and statistically significant (p-value: 0.042) variability amongst discharge hospitals was observed for patients suffering IH-AMI (MOR: 1.57; 95% CI: 1.33-2.06; p-value: 0.019) as compared with OH-AMI (MOR: 1.46; 95% CI: 1.33-1.64; p-value: <0.001).

Using logistic multilevel model, determinants of adherence to chronic poly-therapy were determined (table 6). A lower probability of adherence was observed in women (OR: 0.75; 95% CI: 0.71-0.79; p-value: <0.001) and elderly patients. With this regard, the effect of age was not completely linear: with respect to the reference category (age less than 55 years): the probability of adherence increased in the age group '55-64' years (OR: 1.12; 95% CI: 1.03-1.22; p-value: 0.007) but decreased, although not significantly, in the group '65-74' years (OR: 0.98; 95% CI: 0.90-1.07; p-value: 0.618). A significant drop in the probability of adherence was observed in older age groups ('75-84' years OR: 0.67; 95% CI: 0.61-0.73; p-value: <0.001,  $\geq 85$  years; OR: 0.40; 95% CI: 0.35-0.44; p-value: <0.001). A similar trend was observed for the ongoing concomitant treatments in the six months before index admission.

1  
2  
3 In addition, lower adherence to chronic poly-therapy was observed among patients with  
4 comorbidities. In contrast, a significantly higher adherence to poly-therapy was  
5 observed amongst patients already taking E-B drugs in the 6 months prior index  
6 admission (OR: 1.57; 95% CI: 1.47-1.67; p-value: <0.001) and amongst patients  
7 suffering from an ST-elevation AMI (OR: 1.48; 95% CI: 1.40-1.56; p-value: <0.001).  
8 Finally, a lower probability of adherence was observed in patients discharged from  
9 unspecialized hospital wards as compared with those who discharged from cardiology  
10 ward (OR: 0.58; 95% CI: 0.54-0.63; p-value: <0.001).  
11  
12  
13  
14  
15  
16

17 After adjustment for potential confounders (including age, gender, renal disease,  
18 sinoatrial bradycardia, asthma, mental disorders, ST-elevation AMI, ongoing  
19 concomitant treatments, and E-B drugs use during the 6 months prior to hospitalization)  
20 patients suffering IH-AMI were 46% less likely to be adherent to poly-therapy as  
21 compared with OH-AMI patients (OR: 0.54; 95% CI: 0.47-0.62; p-value: <0.001).  
22 As summarized in table 7, IH-AMI patients showed significantly lower adherence levels  
23 for three of four E-B drugs, i.e., statins, antithrombotics and ACEI/ARBs. This “gap”  
24 was less significant for Beta-blockers.  
25  
26  
27  
28  
29  
30  
31  
32  
33  
34

## 35 DISCUSSION

### 36 Prevalence and clinical characteristics of IH-AMI patients.

37 Acute myocardial infarction occurring in patients who have already been admitted to the  
38 hospital for other clinical conditions is an entity that has been poorly investigated so far.  
39 In this study, amongst all the patients experiencing AMI between January 1<sup>st</sup> 2012 and  
40 December 31<sup>th</sup> 2016 in Lazio region (see cohort selection in figure 1), the proportion of  
41 patients with IH-AMI of all patients with AMI was 4.0%. Our study has several key  
42 findings. First, compared with OH-AMI patients, those suffering IH-AMI were more  
43 often female, older, and less likely to be discharged from cardiology wards, possibly  
44 reflecting a higher burden of comorbidities. Indeed, IH-AMI patients had more often a  
45 history of renal disease, asthma, mental disorders and more frequently were treated with  
46 beta-blockers, antithrombotic agents, ACE-Is/ARBs or statins in the 6 months prior the  
47 index event Interestingly, IH-AMI patients less frequently suffered from ST-elevation  
48 AMI. Much of these findings are concordant with the observations from a previous  
49 study by Zahn et al. [23]. In addition, Maynard et al. [3] reported that patients who had  
50  
51  
52  
53  
54  
55  
56  
57  
58  
59  
60

1  
2  
3 AMI while hospitalized for other medical conditions were older, more likely to have  
4 atypical symptoms, and had higher rates of renal disease, cerebrovascular disease,  
5 congestive heart failure, diabetes mellitus, chronic obstructive pulmonary disease,  
6 dementia, and cancer than patients who presented as OH-AMI to the Department of  
7 Veterans Affairs Health System.  
8  
9  
10  
11

12 Second, and possibly even more important, we observed that patients experiencing IH-  
13 AMI were less likely to be adherent to E-B medications for secondary prevention of  
14 AMI during 6-month follow-up. Moreover IH-AMI patients were more likely to be  
15 discharged from non-cardiological wards and this may have negatively impacted on the  
16 quality of care after the acute event.  
17  
18  
19  
20  
21

### 22 **Adherence to chronic poly-therapy.**

23  
24 Concerning the whole study period, we found that after a hospital discharge for AMI,  
25 only 60% of patients were deemed adherent to poly-therapy in the following 6 months.  
26 Treatments with proven benefit in secondary prevention following AMI were underused  
27 in this study. This result is alarming if we consider that our definition of adherence was  
28 not very restrictive (i.e., adherence defined as MPR  $\geq$  75% for at least three of the four  
29 predefined E-B drugs) and that adherence was evaluated only for the first 6 months after  
30 AMI (adherence should be greater in the initial stages of care and may decrease over  
31 time) [24]. Our findings are consistent with the results of other investigations, which  
32 reported unsatisfactory prescribing rates of E-B therapies after AMI during different  
33 time frames [15] and in different countries [21,22,25].  
34  
35  
36  
37  
38  
39  
40  
41  
42

43 To the best of our knowledge our study was the first to assess, whether adherence  
44 differed between patients who had IH-AMI as compared with those who experienced  
45 OH-AMI. Interestingly, the setting of AMI onset had a significant impact on poly-  
46 therapy adherence. In fact, patients who had AMI during their hospital stay were less  
47 likely to be adherent to chronic poly-therapy compared with patients who had AMI  
48 outside of the hospital. In crude logistic multilevel model, IH-AMI patients were 53%  
49 less likely to be adherent as compared with OH-AMI patients (OR: 0.47; 95% CI: 0.41-  
50 0.54; p-value: <0.001). After adjustment for potential confounders, this relationship was  
51 only slightly attenuated but remained strongly significant (OR: 0.54; 95% CI: 0.47-0.62;  
52 p-value: <0.001). Moreover, we observed a greater variability in terms of adherence to  
53 multiple recommended secondary prevention therapies for IH-AMI patients. This  
54  
55  
56  
57  
58  
59  
60

1  
2  
3 finding might reflect the lack of standardized and homogenous clinical care pathways  
4 within hospitals of discharge for patients who have suffered AMI during hospitalization  
5 for other medical conditions. Of note, estimates were adjusted for all variables identified  
6 as determinants of adherence to poly-therapy such as age, gender, renal disease,  
7 sinoatrial bradycardia, asthma, mental disorders, ST-elevation AMI, ongoing  
8 concomitant treatments, and E-B drugs use during the 6 months prior to hospitalisation.  
9 Although being discharge from a specialized hospital ward (e.g., cardiology, cardiac  
10 surgery, coronary care units) was found to be associated with higher adherence rates, we  
11 decided not to adjust for discharge ward because we felt it could be a proxy for setting  
12 of AMI onset. IH-AMI patients were less likely discharged from cardiology wards (48%  
13 vs 80%) and this reflects a different care pathway for those compared to patients who  
14 had OH-AMI. In this situation, an adjustment for discharge ward, could have introduced  
15 (rather than eliminated) a bias (overadjustment) [26].  
16  
17  
18  
19  
20  
21  
22  
23  
24  
25

26 We also found that female gender, older age, mental disorders, renal disease, asthma,  
27 and ongoing concomitant treatments were significantly associated with non-adherence  
28 to chronic poly-therapy. Conversely, adherence was positively and significantly  
29 associated with patients who had a severe form of disease (ST-elevation AMI) and  
30 patients who have already begun E-B drugs in the 6 months before index admission.  
31  
32  
33  
34  
35

36 Our findings are consistent with the results of other investigations. It is notable that the  
37 current study demonstrates that women are receiving less optimal medical therapy in all  
38 age groups and all drug categories. The clinical relevance of gender differences varies  
39 by age and type of medication. For example, small differences are observed in the use  
40 of beta-blockers, larger differences are observed in the use of statins. Smolina et al. [27]  
41 confirmed these gender differences and showed that treatment was less often initiated in  
42 women. Older age was also found to be associated with lower adherence in several  
43 previous studies [15,17,18]. A higher prevalence of cognitive disorders, memory  
44 impairment, and limited ability to absorb new information in the elderly population  
45 have been associated with lower adherence [28]. Tuppin et al. [18] reported that  
46 adherence to E-B treatment was decreased significantly by an age greater than 74 years,  
47 confirming our findings. The prescription of complex regimens including multiple drugs  
48 has been widely acknowledged as a barrier to patient adherence [29]: the longer the list  
49 of drugs prescribed, the lower the adherence of patients. Chronic conditions like asthma,  
50 sinoatrial bradycardia and renal disease reduce drug prescription of specific ATC  
51  
52  
53  
54  
55  
56  
57  
58  
59  
60

1  
2  
3 groups due to adverse effects and contraindications increasing the probability of poor  
4 adherence to chronic poly-therapy. A previous hospitalization with a diagnosis of  
5 mental disorders decreased the odds of adherence: the mechanisms by which mental  
6 disorders can affect adherence may include poor motivation, pessimism about treatment  
7 effectiveness, diminished attention, memory and cognition, decreased self-care, and  
8 even intentional self-harm [30]. Moreover, patients suffering from ST-elevation AMI or  
9 those who had already begun E-B drugs before index AMI were more likely to be  
10 adherent to chronic poly-therapy. The former have had a more severe form of the  
11 disease and were probably more carefully monitored and made aware of the long-term  
12 benefits generated by a continuous and persistent drug treatment. The latter were  
13 already used to the chronic and continuous intake of those drugs that are recommended  
14 for the secondary prevention of AMI, as a sort of “inertial effect”.

### 24 **Strengths and limitations of the study.**

25  
26  
27 The population-based design, many patients involved and the opportunity to integrate  
28 many sources of data to define and analyse the patient’s care pathway are the main  
29 strengths of this study. Moreover, to our knowledge, this is the first study to evaluate  
30 the adherence to E-B medications, considering the setting of AMI onset.

31  
32  
33 However, the results come from a single region in Italy and may not be generalizable to  
34 the other Italian regions due to possible differences in the organization of regional  
35 health care services. This notwithstanding, our results are in line with results of similar  
36 studies carried out in Italy [31]. Moreover, our pharmaceutical database does not  
37 contain information on the prescribed daily doses and adherence to drug treatment was  
38 estimated on the basis of the DDDs [32]. Using DDDs to calculate drug coverage, we  
39 run the risk of not accounting for the real-life dosing of a drug when it is used for other  
40 than its principal indication [33]. Therefore, misclassification of drug utilization may  
41 have occurred because the dosage instructions were not known, and the defined daily  
42 doses were used as the dosage assumption. However, in our study, we tried to overcome  
43 this limitation by considering DDDs of betablockers reviewed by a panel of physicians,  
44 seeing that in secondary prevention post AMI, DDDs are prescribed at lower dosages  
45 than the main therapeutic indication.

46  
47  
48 In addition, MPR method does not depend on whether patients take their medication as  
49 prescribed but depends on the prescription given by physicians. Although we cannot be  
50  
51  
52  
53  
54  
55  
56  
57  
58  
59  
60



1  
2  
3 sure that patients actually took the drug, collecting their medications from the pharmacy  
4 is a reasonable indication of an intention to continue with therapy: nevertheless, the  
5 results of adherence based on claims data may be overestimated.  
6  
7

8  
9 Finally, although all available potential confounders were included in the models to  
10 adjust for differences in patients' characteristics, we cannot exclude that the lack of  
11 more detailed clinical data might have caused unmeasured confounding. We tried to  
12 counteract this limit by applying several restrictions to obtain a cohort with patients that  
13 were as homogeneous as possible.  
14  
15  
16

### 17 18 **Conclusions.**

19  
20  
21 The availability of information systems offers the opportunity to monitor the quality of  
22 care and identify weaknesses in public health-care systems. Although most attention has  
23 been paid to patients with AMI admitted via the community emergency medical system  
24 or through the emergency department, AMI occurring during hospitalization for other  
25 medical problems is an important clinical problem.  
26  
27  
28

29  
30 The results of our study show that, in clinical practice, pharmacotherapy for secondary  
31 prevention of AMI is not fully consistent with recommended clinical guidelines,  
32 especially for IH-AMI patients. Moreover, a strong association between the setting of  
33 AMI onset and adherence to multiple E-B drugs was observed. Our findings provide  
34 evidence on a previously unidentified groups of patients at risk for poor adherence, who  
35 might benefit from greater medical attention and dedicated health-care interventions.  
36 The data strongly support the need for continued efforts to improve adherence to  
37 chronic poly-therapy post AMI. These findings could also stimulate efforts to  
38 implement hospital strategies to give the same "attention" to IH-AMI patients as OH-  
39 AMI patients. In light of the impressive and highly significant impact of the type of  
40 discharge ward on the adherence to chronic poly-therapy, it is feasible that much of the  
41 "disadvantage" of IH-AMI patients is attributable to the discharge processes, in  
42 particular through how far they support effective transitions in and continuity of care. A  
43 range of policy tools could be appropriate to reduce this gap, for example by planning  
44 differentiated health care transition interventions according to the setting of AMI onset.  
45 However, further studies are needed to confirm this association.  
46  
47  
48  
49  
50  
51  
52  
53  
54  
55  
56  
57  
58  
59  
60

**Figure 1. Cohort selection. Exclusion criteria flow chart**

For peer review only

1  
2  
3  
4  
5  
6  
7  
8  
9  
10  
11  
12  
13  
14  
15  
16  
17  
18  
19  
20  
21  
22  
23  
24  
25  
26  
27  
28  
29  
30  
31  
32  
33  
34  
35  
36  
37  
38  
39  
40  
41  
42  
43  
44  
45  
46  
47  
48  
49  
50  
51  
52  
53  
54  
55  
56  
57  
58  
59  
60



**Table 1. Baseline characteristics of the study cohort**

|                                                            | <b>Total cohort</b><br><b>25.779 (100%)</b> | <b>IH-AMI</b><br><b>1.044 (4.0%)</b> | <b>OH-AMI</b><br><b>24.735 (96.0%)</b> |
|------------------------------------------------------------|---------------------------------------------|--------------------------------------|----------------------------------------|
|                                                            | <b>N (%)</b>                                | <b>N (%)</b>                         | <b>N (%)</b>                           |
| Age group (years)                                          |                                             |                                      |                                        |
| 18-54                                                      | 4702 (18.24)                                | 101 (9.67)                           | 4601 (18.6)                            |
| 55-64                                                      | 5886 (22.83)                                | 149 (14.27)                          | 5737 (23.19)                           |
| 65-74                                                      | 6387 (24.78)                                | 243 (23.28)                          | 6144 (24.84)                           |
| 75-84                                                      | 6122 (23.75)                                | 360 (34.48)                          | 5762 (23.29)                           |
| 85 +                                                       | 2682 (10.4)                                 | 191 (18.3)                           | 2491 (10.07)                           |
| Age, mean(std), years                                      | 67.61 (13.20)                               | 73.19 (12.52)                        | 67.37 (13.18)                          |
| Gender (men)                                               | 17138 (66.48)                               | 590 (56.51)                          | 16548 (66.9)                           |
| ST-elevation AMI                                           | 11108 (43.09)                               | 319 (30.56)                          | 10789 (43.62)                          |
| Renal disease                                              | 2335 (9.06)                                 | 166 (15.9)                           | 2169 (8.77)                            |
| Sinoatrial bradycardia                                     | 249 (0.97)                                  | 10 (0.96)                            | 239 (0.97)                             |
| Asthma                                                     | 188 (0.73)                                  | 12 (1.15)                            | 176 (0.71)                             |
| Mental disorders                                           | 1098 (4.26)                                 | 97 (9.29)                            | 1001 (4.05)                            |
| Ongoing concomitant treatments (distinct group of drugs) * |                                             |                                      |                                        |
| 0-1                                                        | 7587 (29.43)                                | 180 (17.24)                          | 7407 (29.95)                           |
| 2-4                                                        | 8507 (33)                                   | 293 (28.07)                          | 8214 (33.21)                           |
| 5-7                                                        | 5236 (20.31)                                | 272 (26.05)                          | 4964 (20.07)                           |
| 8-10                                                       | 2688 (10.43)                                | 161 (15.42)                          | 2527 (10.22)                           |
| >10                                                        | 1761 (6.83)                                 | 138 (13.22)                          | 1623 (6.56)                            |
| E-B drugs use (at least 1 prescription) *                  | 17083 (66.27)                               | 811 (77.68)                          | 16272 (65.79)                          |
| Discharge ward (cardiology)                                | 20207 (78.39)                               | 501 (47.99)                          | 19706 (79.67)                          |

\*, prescribed in the 6 months preceding the index admission; E-B, evidence-based

**Table 2. Adherence to evidence-based medications by gender and age group**

| Age group<br>(years) | $\beta$ -Blockers<br>(%) | ACEI/ARBs<br>(%) | Antithrombotics<br>(%) | Statins<br>(%) |
|----------------------|--------------------------|------------------|------------------------|----------------|
| <b>Males</b>         |                          |                  |                        |                |
| 18-54                | 55.20                    | 62.50            | 77.18                  | 87.74          |
| 55-64                | 54.41                    | 68.83            | 78.00                  | 88.37          |
| 65-74                | 51.44                    | 68.64            | 74.20                  | 83.74          |
| 75-84                | 45.18                    | 61.81            | 65.80                  | 73.83          |
| 85 +                 | 37.44                    | 50.25            | 54.99                  | 58.93          |
| <b>Total</b>         | <b>51.10</b>             | <b>64.94</b>     | <b>73.20</b>           | <b>82.59</b>   |
| <b>Females</b>       |                          |                  |                        |                |
| 18-54                | 48.95                    | 49.20            | 66.83                  | 76.33          |
| 55-64                | 51.67                    | 61.61            | 68.83                  | 78.97          |
| 65-74                | 52.00                    | 65.37            | 65.27                  | 76.24          |
| 75-84                | 48.92                    | 61.77            | 58.74                  | 67.44          |
| 85 +                 | 40.21                    | 53.99            | 51.69                  | 51.15          |
| <b>Total</b>         | <b>48.34</b>             | <b>59.90</b>     | <b>61.03</b>           | <b>68.81</b>   |
| <b>Whole cohort</b>  |                          |                  |                        |                |
| 18-54                | 54.13                    | 60.21            | 75.39                  | 85.77          |
| 55-64                | 53.84                    | 67.33            | 75.99                  | 86.41          |
| 65-74                | 51.62                    | 67.59            | 71.33                  | 81.34          |
| 75-84                | 46.93                    | 61.79            | 62.50                  | 70.84          |
| 85 +                 | 39.19                    | 52.61            | 52.91                  | 54.03          |
| <b>Total</b>         | <b>50.18</b>             | <b>63.25</b>     | <b>69.12</b>           | <b>77.97</b>   |

ACEI/ARBs, angiotensin-converting enzyme inhibitors/angiotensin receptor blockers

**Table 3. Adherence to chronic poly-therapy by gender and age group**

| Age group<br>(years) | Adherence (%)<br>(MPR $\geq$ 75% at least 3 of 4 E-B drugs) | Adherence (%)<br>(MPR $\geq$ 75% for all 4 E-B drugs) |
|----------------------|-------------------------------------------------------------|-------------------------------------------------------|
| <b>Males</b>         |                                                             |                                                       |
| 18-54                | 67.95                                                       | 32.20                                                 |
| 55-64                | 70.53                                                       | 32.47                                                 |
| 65-74                | 67.12                                                       | 27.72                                                 |
| 75-84                | 54.05                                                       | 20.12                                                 |
| 85 +                 | 39.15                                                       | 11.81                                                 |
| <b>Total</b>         | <b>64.13</b>                                                | <b>27.66</b>                                          |
| <b>Females</b>       |                                                             |                                                       |
| 18-54                | 51.91                                                       | 23.55                                                 |
| 55-64                | 60.64                                                       | 25.67                                                 |
| 65-74                | 58.88                                                       | 24.59                                                 |
| 75-84                | 51.08                                                       | 18.06                                                 |
| 85 +                 | 36.37                                                       | 11.53                                                 |
| <b>Total</b>         | <b>51.49</b>                                                | <b>19.93</b>                                          |
| <b>Whole cohort</b>  |                                                             |                                                       |
| 18-54                | 65.19                                                       | 30.71                                                 |
| 55-64                | 68.47                                                       | 31.06                                                 |
| 65-74                | 64.47                                                       | 26.71                                                 |
| 75-84                | 52.66                                                       | 19.16                                                 |
| 85 +                 | 37.40                                                       | 11.63                                                 |
| <b>Total</b>         | <b>59.89</b>                                                | <b>25.07</b>                                          |

**Table 4. Variation between clusters for OH-AMI patients: the MORs**

| Multilevel model     | Level of analysis | Explanatory variables     | MOR (95% CI)       | p Value |
|----------------------|-------------------|---------------------------|--------------------|---------|
| Two-level regression | (Patients) - HoD  | Intercept only            | 1.71 (1.50 - 2.02) | <0.001  |
| Two-level regression | (Patients) - HoD  | Patient's characteristics | 1.46 (1.33 - 1.64) | <0.001  |

HoD, hospital of discharge; MOR, median odds ratio

**Table 5. Variation between clusters for IH-AMI patients: the MORs**

| Multilevel model     | Level of analysis | Explanatory variables     | MOR (95% CI)       | p Value |
|----------------------|-------------------|---------------------------|--------------------|---------|
| Two-level regression | (Patients) - HoD  | Intercept only            | 1.69 (1.43 - 2.16) | 0.005   |
| Two-level regression | (Patients) - HoD  | Patient's characteristics | 1.57 (1.33 - 2.06) | 0.019   |

HoD, hospital of discharge; MOR, median odds ratio

**Table 6. Association between adherence to chronic poly-therapy and symptom onset (IH-AMI VS. OH-AMI), socio-demographics and clinical characteristics.**

| Category                                                                                                  | Subcategory | OR   | 95% CI      | p Value |
|-----------------------------------------------------------------------------------------------------------|-------------|------|-------------|---------|
| Symptom onset of AMI                                                                                      | OH-AMI      | 1.00 | -           | -       |
|                                                                                                           | IH-AMI      | 0.54 | 0.47 - 0.62 | <0.001  |
| Gender of patient                                                                                         | Male        | 1.00 | -           | -       |
|                                                                                                           | Female      | 0.75 | 0.71 - 0.79 | <0.001  |
| Age group (years)                                                                                         | (18-54)     | 1.00 | -           | -       |
|                                                                                                           | (55-64)     | 1.12 | 1.03 - 1.22 | 0.007   |
|                                                                                                           | (65-74)     | 0.98 | 0.90 - 1.07 | 0.618   |
|                                                                                                           | (75-84)     | 0.67 | 0.61 - 0.73 | <0.001  |
|                                                                                                           | (85 +)      | 0.40 | 0.35 - 0.44 | <0.001  |
| Renal disease                                                                                             | No          | 1.00 | -           | -       |
|                                                                                                           | Yes         | 0.58 | 0.53 - 0.64 | <0.001  |
| Sinoatrial bradycardia                                                                                    | No          | 1.00 | -           | -       |
|                                                                                                           | Yes         | 0.83 | 0.64 - 1.08 | 0.171   |
| Asthma                                                                                                    | No          | 1.00 | -           | -       |
|                                                                                                           | Yes         | 0.51 | 0.37 - 0.69 | <0.001  |
| ST-elevation AMI                                                                                          | No          | 1.00 | -           | -       |
|                                                                                                           | Yes         | 1.48 | 1.40 - 1.56 | <0.001  |
| Ongoing concomitant treatments in the 6 months before index admission (number of distinct group of drugs) | (0-1)       | 1.00 | -           | -       |
|                                                                                                           | (2-4)       | 1.05 | 0.98 - 1.13 | 0.147   |
|                                                                                                           | (5-7)       | 0.92 | 0.84 - 1.00 | 0.055   |
|                                                                                                           | (8-10)      | 0.90 | 0.81 - 0.99 | 0.046   |
|                                                                                                           | (10 +)      | 0.73 | 0.64 - 0.82 | <0.001  |
| E-B drugs use in the 6 months before index admission (at least 1 prescription)                            | No          | 1.00 | -           | -       |
|                                                                                                           | Yes         | 1.57 | 1.47 - 1.67 | <0.001  |
| Mental disorders                                                                                          | No          | 1.00 | -           | -       |
|                                                                                                           | Yes         | 0.72 | 0.63 - 0.82 | <0.001  |

OR, odds ratio; CI, confidence interval; E-B, evidence-based

**Table 7. Adherence to evidence-based medications by the setting of AMI onset**

| Symptom onset of AMI | $\beta$ -Blockers (%) | ACEI/ARBs (%) | Antithrombotics (%) | Statins (%)  |
|----------------------|-----------------------|---------------|---------------------|--------------|
| <b>OH-AMI</b>        | 50.24                 | 63.85         | 69.88               | 78.78        |
| <b>IH-AMI</b>        | 48.66                 | 48.95         | 51.15               | 58.72        |
| <b>Whole cohort</b>  | <b>50.18</b>          | <b>63.25</b>  | <b>69.12</b>        | <b>77.97</b> |

ACEI/ARBs, angiotensin-converting enzyme inhibitors/angiotensin receptor blockers

For peer review only

## CONTRIBUTORSHIP STATEMENT

*Salvatore Soldati* contributed to the concept and design of the study, the acquisition of data from the Lazio regional health information systems, the analysis of data and the statistical methodology required for the analytic modelling, the interpretation of results, and the writing of the article.

*Mirko Di Martino* contributed to the design of the study, the statistical methodology required for the analytic modelling, the interpretation of results, and the writing of the article.

*Davide Castagno* contributed to the clinical interpretation of results, and the writing of the article.

*Marina Davoli* and *Daniilo Fusco* contributed to the design of the study, and the critical revision of the paper for important intellectual content, and they have given their final approval of the version submitted for publication.

All authors agree to be accountable for all aspects of the work and ensure that questions related to the accuracy or integrity of any part of the work were appropriately investigated and resolved.

## COMPETING INTERESTS

The authors declare that they have non-financial associations that may be relevant to the submitted manuscript.

## FUNDING STATEMENT

This research received no specific grant from any funding agency in the public, commercial or not-for-profit sectors.

## DATA SHARING STATEMENT

No additional data are available.

## PRIVACY LAWS

This study was carried out in full compliance with the current privacy laws. The Department of Epidemiology is legitimized by the Lazio Region Committee in

1  
2  
3 managing and analyzing data from the regional health information systems for  
4 epidemiological purposes.  
5  
6  
7  
8  
9  
10  
11  
12  
13  
14  
15  
16  
17  
18  
19  
20  
21  
22  
23  
24  
25  
26  
27  
28  
29  
30  
31  
32  
33  
34  
35  
36  
37  
38  
39  
40  
41  
42  
43  
44  
45  
46  
47  
48  
49  
50  
51  
52  
53  
54  
55  
56  
57  
58  
59  
60

For peer review only



## References

1. Peterson ED, Shah BR, Parsons L, et al. Trends in quality of care for patients with acute myocardial infarction in the National Registry of Myocardial Infarction from 1990 to 2006. *Am Heart J*. 2008; 156(6):1045-1055.
2. Yeh RW, Sidney S, ChandraM, Sorel M, Selby JV, Go AS. Population trends in the incidence and outcomes of acute myocardial infarction. *N Engl J Med*. 2010; 362(23): 2155-2165.
3. Maynard C, Lowy E, Rumsfeld J, et al. The prevalence and outcomes of in-hospital acute myocardial infarction in the Department of Veterans Affairs health system. *Arch Intern Med*. 2006; 166(13): 1410-1416.
4. Erne P, Bertel O, Urban P, Pedrazzini G, Lüscher TF, Radovanovic D; AMIS Plus Investigators. Inpatient versus outpatient onsets of acute myocardial infarction. *Eur J Intern Med*. 2015; 26(6): 414-419.
5. Bradley SM, Borgerding JA, Wood GB, Maynard C, Fihn SD. Incidence, Risk Factors, and Outcomes Associated With In-Hospital Acute Myocardial Infarction. *JAMA Netw Open*. 2019;2(1): e187348.
6. National Institute for Clinical Excellence. Secondary prevention in primary and secondary care for patients following a myocardial infarction. NICE guidelines [CG172]. Published date: November 2013.
7. Smith SC Jr, Benjamin EJ, Bonow RO, Braun LT, Creager MA, et al. AHA/ACCF secondary prevention and risk reduction therapy for patients with coronary and other atherosclerotic vascular disease: 2011 update: a guideline from the American Heart Association and American College of Cardiology Foundation endorsed by the World Heart Federation and the Preventive Cardiovascular Nurses Association. *J Am Coll Cardiol* 2011; 58:2432-46.
8. Choudhry NK, Glynn RJ, Avorn J, et al. Untangling the relationship between medication adherence and post-myocardial infarction outcomes: medication adherence and clinical outcomes. *Am Heart J*. 2014; 167:51–8. e5.
9. Mathews R, Wang W, Kaltenbach LA, Thomas L, Shah RU, Ali M, Peterson ED, Wang TY. Hospital Variation in Adherence Rates to Secondary Prevention

- 1  
2  
3 Medications and the Implications on Quality. *Circulation*. 2018 May  
4 15;137(20):2128-2138.  
5  
6  
7  
8 10. Hamood H, Hamood R, Green MS, Almog R. Effect of adherence to evidence-  
9 based therapy after acute myocardial infarction on all-cause mortality.  
10 *Pharmacoepidemiology Drug Saf*. 2015; 24:1093–104.  
11  
12  
13 11. Gislason GH, Rasmussen JN, Abildstrøm SZ, Gadsbøll N, Buch P, Friberg J,  
14 Rasmussen S, Køber L, Stender S, Madsen M, Torp-Pedersen C. Long-term  
15 compliance with beta-blockers, angiotensin-converting enzyme inhibitors, and  
16 statins after acute myocardial infarction. *Eur Heart J*. 2006 May;27(10):1153-8.  
17  
18  
19 12. Korhonen MJ, Robinson JG, Annis IE, Hickson RP, Bell JS, Hartikainen J, Fang  
20 G. Adherence Tradeoff to Multiple Preventive Therapies and All-Cause  
21 Mortality After Acute Myocardial Infarction. *J Am Coll Cardiol*. 2017. 70:1543-  
22 54  
23  
24  
25 13. Kirchmayer U, Di Martino M, Agabiti N, et al. Effect of evidence-based drug  
26 therapy on long-term outcomes in patients discharged after myocardial  
27 infarction: a nested case–control study in Italy. *Pharmacoepidemiol Drug Saf*  
28 2013; 22: 649–57.  
29  
30  
31 14. Di Martino M, Alagna M, Cappai G, et al. Adherence to evidence-based drug  
32 therapies after myocardial infarction: is geographic variation related to hospital  
33 of discharge or primary care providers? A cross-classified multilevel design.  
34 *BMJ Open*. 2016;6(4): e010926.  
35  
36  
37 15. Kirchmayer U, Agabiti N, Belleudi V, et al. Socio-demographic differences in  
38 adherence to evidence-based drug therapy after hospital discharge from acute  
39 myocardial infarction: a population-based cohort study in Rome, Italy. *J Clin  
40 Pharm Ther* 2012; 37: 37–44.  
41  
42  
43 16. Simpson E, Beck C, Richard H, Eisenberg MJ, Pilot L. Drug prescriptions after  
44 acute myocardial infarction: dosage, compliance, and persistence. *American  
45 Heart Journal*, 2003; 145(3): 438–444.  
46  
47  
48  
49  
50  
51  
52  
53  
54  
55  
56  
57  
58  
59  
60

- 1  
2  
3 17. Austin PC, Tu JV, Ko DT, Alter DA. Use of evidence-based therapies after  
4 discharge among elderly patients with acute myocardial infarction. *Canadian*  
5 *Medical Association Journal*, 2008; 179(9): 895–900.  
6  
7
- 8  
9 18. Tuppin P, Neumann A, Danchin N, Weill A, Ricordeau P, de Peretti C,  
10 Allemand H. Combined secondary prevention after hospitalization for  
11 myocardial infarction in France: analysis from a large administrative database.  
12 *Archives of Cardiovascular Diseases*, 2009; 102(4): 279–292.  
13  
14
- 15 19. Schneeweiss S, Seeger JD, Maclure M, et al. Performance of comorbidity scores  
16 to control for confounding in epidemiologic studies using claims data. *Am J*  
17 *Epidemiol* 2001; 154 (9): 854 – 864.  
18  
19
- 20 20. Larsen K, Merlo J. Appropriate assessment of neighborhood effects on  
21 individual health: integrating random and fixed effects in multilevel logistic  
22 regression. *American Journal of Epidemiology* 2005; 161: 81-88.  
23  
24
- 25 21. Ho PM, Bryson CL, Rumsfeld JS. Medication adherence: its importance in  
26 cardiovascular outcomes. *Circulation* 2009; 119:3028–35.  
27  
28
- 29 22. Mathews R, Wang TY, Honeycutt E, et al. TRANSLATE-ACS Study  
30 Investigators. Persistence with secondary prevention medications after acute  
31 myocardial infarction: insights from the TRANSLATE-ACS study. *Am Heart J*  
32 2015; 170:62–9.  
33  
34
- 35 23. Zahn R, Schiele R, Seidl K, et al; Maximal Individual Therapy in Acute  
36 Myocardial Infarction (MITRA) Study Group. Acute myocardial infarction  
37 occurring in versus out of the hospital: patient characteristics and clinical  
38 outcome. *J Am Coll Cardiol*. 2000; 35:1820–1826.  
39  
40
- 41 24. Di Martino M, Kirchmayer U, Agabiti N, et al. The impact of time-window bias  
42 on the assessment of the long-term effect of medication adherence: the case of  
43 secondary prevention after myocardial infarction. *BMJ OPEN*, 2015; 5(6):  
44 e007866.  
45  
46
- 47 25. Sanf elix-Gimeno G, Peir  S, Ferreros I, et al. Adherence to evidence-based  
48 therapies after acute coronary syndrome: a retrospective population-based cohort  
49  
50  
51  
52  
53  
54  
55  
56  
57  
58  
59  
60

- 1  
2  
3 study linking hospital, outpatient, and pharmacy health information systems in  
4 Valencia, Spain. *J Manag Care Pharm* 2013; 19:247–57.  
5  
6  
7  
8 26. VanderWeele, Tyler J. On the Relative Nature of Overadjustment and  
9 Unnecessary Adjustment. *Epidemiology* 2009; 20; 496-499.  
10  
11  
12 27. Smolina K, Ball L, Humphries KH, et al. Sex disparities in post-acute  
13 myocardial infarction pharmacologic treatment initiation and adherence:  
14 Problem for young women. *Circ Cardiovasc Qual Outcomes* 2015; 8: 586–592.  
15  
16  
17 28. Sattler ELP, Lee JS, Perri M., III Medication (re)fill adherence measures derived  
18 from pharmacy claims data in older Americans. A review of the literature. *Drugs*  
19 *Aging*. 2013; 30:383–399.  
20  
21  
22  
23 29. Vik SA, Maxwell CJ, Hogan DB. Measurement, correlates, and health outcomes  
24 of medication adherence among seniors. *Ann Pharmacother* 2004; 38:303–12  
25  
26  
27  
28 30. Wang PS, Bohn RL, Knight E, Glynn RJ, Mogun H, Avorn J. Noncompliance  
29 with antihypertensive medications: the impact of depressive symptoms and  
30 psychosocial factors. *J Gen Intern Med* 2002;17(7):504-11.  
31  
32  
33  
34 31. Filippi A, D'Ambrosio G, Giustini SE, et al. Pharmacological treatment after  
35 acute myocardial infarction from 2001 to 2006: a survey in Italian primary care.  
36 *J Cardiovasc Med* 2009; 10: 714–18.  
37  
38  
39  
40 32. World Health Organization, Collaborating Centre for Drug Statistics  
41 Methodology, *Guidelines for ATC classification and DDD assignment 2020*.  
42 Oslo, Norway, 2019.  
43  
44  
45  
46 33. Grimmsmann, T., Himmel, W. Discrepancies between prescribed and defined  
47 daily doses: a matter of patients or drug classes? *Eur J Clin Pharmacol* **67**, 847–  
48 854 (2011).  
49  
50  
51  
52  
53  
54  
55  
56  
57  
58  
59  
60

1  
2  
3  
4  
5  
6  
7  
8  
9  
10  
11  
12  
13  
14  
15  
16  
17  
18  
19  
20  
21  
22  
23  
24  
25  
26  
27  
28  
29  
30  
31  
32  
33  
34  
35  
36  
37  
38  
39  
40  
41  
42  
43  
44  
45  
46  
47  
48  
49  
50  
51  
52  
53  
54  
55  
56  
57  
58  
59  
60

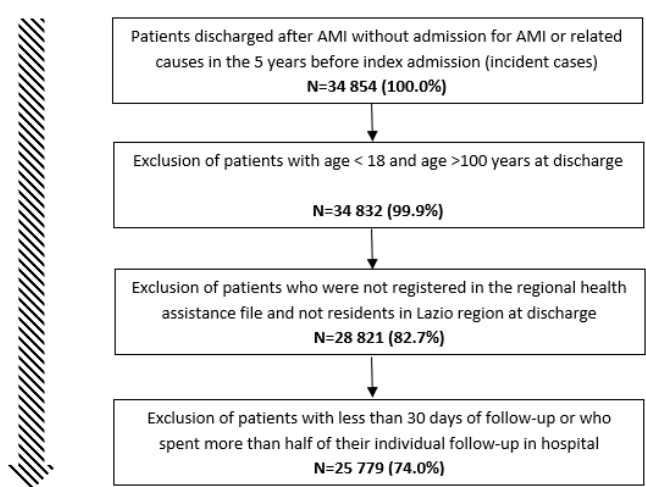

Figure 1. Cohort selection. Exclusion criteria flowchart

**STROBE 2007 (v4) checklist of items to be included in reports of observational studies in epidemiology\***  
**Checklist for cohort, case-control, and cross-sectional studies (combined)**

| Section/Topic             | Item # | Recommendation                                                                                                                                                                                                                                                                                                                                                                                                                                                         | Reported on page #                                          |
|---------------------------|--------|------------------------------------------------------------------------------------------------------------------------------------------------------------------------------------------------------------------------------------------------------------------------------------------------------------------------------------------------------------------------------------------------------------------------------------------------------------------------|-------------------------------------------------------------|
| Title and abstract        | 1      | (a) Indicate the study's design with a commonly used term in the title or the abstract                                                                                                                                                                                                                                                                                                                                                                                 | 1, 2                                                        |
|                           |        | (b) Provide in the abstract an informative and balanced summary of what was done and what was found                                                                                                                                                                                                                                                                                                                                                                    | 2, 3                                                        |
| <b>Introduction</b>       |        |                                                                                                                                                                                                                                                                                                                                                                                                                                                                        |                                                             |
| Background/rationale      | 2      | Explain the scientific background and rationale for the investigation being reported                                                                                                                                                                                                                                                                                                                                                                                   | 4                                                           |
| Objectives                | 3      | State specific objectives, including any pre-specified hypotheses                                                                                                                                                                                                                                                                                                                                                                                                      | 4, 5                                                        |
| <b>Methods</b>            |        |                                                                                                                                                                                                                                                                                                                                                                                                                                                                        |                                                             |
| Study design              | 4      | Present key elements of study design early in the paper                                                                                                                                                                                                                                                                                                                                                                                                                | 5, 6, 7                                                     |
| Setting                   | 5      | Describe the setting, locations, and relevant dates, including periods of recruitment, exposure, follow-up, and data collection                                                                                                                                                                                                                                                                                                                                        | 5, 6, 7, 8                                                  |
| Participants              | 6      | (a) <i>Cohort study</i> —Give the eligibility criteria, and the sources and methods of selection of participants. Describe methods of follow-up<br><i>Case-control study</i> —Give the eligibility criteria, and the sources and methods of case ascertainment and control selection. Give the rationale for the choice of cases and controls<br><i>Cross-sectional study</i> —Give the eligibility criteria, and the sources and methods of selection of participants | 5, 6, 7, 8                                                  |
|                           |        | (b) <i>Cohort study</i> —For matched studies, give matching criteria and number of exposed and unexposed<br><i>Case-control study</i> —For matched studies, give matching criteria and the number of controls per case                                                                                                                                                                                                                                                 | We used a multilevel approach. Matching was Not Applicable. |
| Variables                 | 7      | Clearly define all outcomes, exposures, predictors, potential confounders, and effect modifiers. Give diagnostic criteria, if applicable                                                                                                                                                                                                                                                                                                                               | 7, 8, 9                                                     |
| Data sources/ measurement | 8*     | For each variable of interest, give sources of data and details of methods of assessment (measurement). Describe comparability of assessment methods if there is more than one group                                                                                                                                                                                                                                                                                   | 5, 6, 7, 8, 9                                               |
| Bias                      | 9      | Describe any efforts to address potential sources of bias                                                                                                                                                                                                                                                                                                                                                                                                              | 7, 8, 9, 13                                                 |
| Study size                | 10     | Explain how the study size was arrived at                                                                                                                                                                                                                                                                                                                                                                                                                              | 6, 7, 10, 17                                                |
| Quantitative variables    | 11     | Explain how quantitative variables were handled in the analyses. If applicable, describe which groupings were chosen and why                                                                                                                                                                                                                                                                                                                                           | 7, 8, 9                                                     |
| Statistical methods       | 12     | (a) Describe all statistical methods, including those used to control for confounding                                                                                                                                                                                                                                                                                                                                                                                  | 9, 10                                                       |
|                           |        | (b) Describe any methods used to examine subgroups and interactions                                                                                                                                                                                                                                                                                                                                                                                                    | The quantitative analysis of the                            |

|                  |     |                                                                                                                                                                                                                                                                                                           |                                                                                                       |
|------------------|-----|-----------------------------------------------------------------------------------------------------------------------------------------------------------------------------------------------------------------------------------------------------------------------------------------------------------|-------------------------------------------------------------------------------------------------------|
|                  |     |                                                                                                                                                                                                                                                                                                           | interaction between the different levels of the healthcare system was described on pages 8 and 9.     |
|                  |     | (c) Explain how missing data were addressed                                                                                                                                                                                                                                                               | Not Applicable. We have no missing data.                                                              |
|                  |     | (d) <i>Cohort study</i> —If applicable, explain how loss to follow-up was addressed<br><i>Case-control study</i> —If applicable, explain how matching of cases and controls was addressed<br><i>Cross-sectional study</i> —If applicable, describe analytical methods taking account of sampling strategy | Not Applicable                                                                                        |
|                  |     | (e) Describe any sensitivity analyses                                                                                                                                                                                                                                                                     | Not Applicable                                                                                        |
| <b>Results</b>   |     |                                                                                                                                                                                                                                                                                                           |                                                                                                       |
| Participants     | 13* | (a) Report numbers of individuals at each stage of study—eg numbers potentially eligible, examined for eligibility, confirmed eligible, included in the study, completing follow-up, and analysed                                                                                                         | 10, 11, 12                                                                                            |
|                  |     | (b) Give reasons for non-participation at each stage                                                                                                                                                                                                                                                      | 10, 17                                                                                                |
|                  |     | (c) Consider use of a flow diagram                                                                                                                                                                                                                                                                        | 10, 17                                                                                                |
| Descriptive data | 14* | (a) Give characteristics of study participants (eg demographic, clinical, social) and information on exposures and potential confounders                                                                                                                                                                  | 10, 11, 12, 18, 19, 20, 21, 22, 23                                                                    |
|                  |     | (b) Indicate number of participants with missing data for each variable of interest                                                                                                                                                                                                                       | Not Applicable. We have no missing data.                                                              |
|                  |     | (c) <i>Cohort study</i> —Summarise follow-up time (eg, average and total amount)                                                                                                                                                                                                                          | Not Applicable                                                                                        |
| Outcome data     | 15* | <i>Cohort study</i> —Report numbers of outcome events or summary measures over time                                                                                                                                                                                                                       | 10, 11, 12, 21, 23                                                                                    |
|                  |     | <i>Case-control study</i> —Report numbers in each exposure category, or summary measures of exposure                                                                                                                                                                                                      | Not Applicable                                                                                        |
|                  |     | <i>Cross-sectional study</i> —Report numbers of outcome events or summary measures                                                                                                                                                                                                                        | Not Applicable                                                                                        |
| Main results     | 16  | (a) Give unadjusted estimates and, if applicable, confounder-adjusted estimates and their precision (eg, 95% confidence interval). Make clear which confounders were adjusted for and why they were included                                                                                              | 11, 12, 13, 22, 23                                                                                    |
|                  |     | (b) Report category boundaries when continuous variables were categorized                                                                                                                                                                                                                                 | 11, 12, 18, 23                                                                                        |
|                  |     | (c) If relevant, consider translating estimates of relative risk into absolute risk for a meaningful time period                                                                                                                                                                                          | This is a multilevel study on variation in adherence to clinical guidelines. Therefore the “reporting |

|                          |    |                                                                                                                                                                            |                                                                                                                          |
|--------------------------|----|----------------------------------------------------------------------------------------------------------------------------------------------------------------------------|--------------------------------------------------------------------------------------------------------------------------|
|                          |    |                                                                                                                                                                            | method” suggested by the checklist (i.e. absolute risk measures) might probably be misleading within this framework.     |
| Other analyses           | 17 | Report other analyses done—eg analyses of subgroups and interactions, and sensitivity analyses                                                                             | 11, 12, 19, 20, 22                                                                                                       |
| <b>Discussion</b>        |    |                                                                                                                                                                            |                                                                                                                          |
| Key results              | 18 | Summarise key results with reference to study objectives                                                                                                                   | 12, 13, 14, 15                                                                                                           |
| Limitations              | 19 | Discuss limitations of the study, taking into account sources of potential bias or imprecision. Discuss both direction and magnitude of any potential bias                 | 15, 16                                                                                                                   |
| Interpretation           | 20 | Give a cautious overall interpretation of results considering objectives, limitations, multiplicity of analyses, results from similar studies, and other relevant evidence | 12, 13, 14, 15, 16                                                                                                       |
| Generalisability         | 21 | Discuss the generalisability (external validity) of the study results                                                                                                      | 15                                                                                                                       |
| <b>Other information</b> |    |                                                                                                                                                                            |                                                                                                                          |
| Funding                  | 22 | Give the source of funding and the role of the funders for the present study and, if applicable, for the original study on which the present article is based              | 24 This research received no specific grant from any funding agency in the public, commercial or not-for-profit sectors. |

\*Give information separately for cases and controls in case-control studies and, if applicable, for exposed and unexposed groups in cohort and cross-sectional studies.

**Note:** An Explanation and Elaboration article discusses each checklist item and gives methodological background and published examples of transparent reporting. The STROBE checklist is best used in conjunction with this article (freely available on the Web sites of PLoS Medicine at <http://www.plosmedicine.org/>, Annals of Internal Medicine at <http://www.annals.org/>, and Epidemiology at <http://www.epidem.com/>). Information on the STROBE Initiative is available at [www.strobe-statement.org](http://www.strobe-statement.org).
